# Supplementary material for: The origin for highly enantioselective induction of 1-naphthol to isatin-derived N-Boc ketimines catalyzed by quinine thiourea catalyst: an experimental and computational study
Source: Royal Society of Chemistry journal article supplement (doi:10.1039/c5ra12795e), 2015-01-01
Supplement: c5ra12795e1.pdf [file c5ra12795e1.pdf]

# The origin for highly enantioselective induction of 1-naphthol to isatin -derived N-Boc ketimines catalyzed by quinine thiourea catalyst: An Experimental and Computational Study

Prathibha kumari,<sup>a,b</sup> Sunirmal Barik,<sup>b,c</sup> Noorul H. Khan,<sup>\*a,b</sup> Bishwajit Ganguly,<sup>\*b,c</sup> Rukhsana I. Kureshy,<sup>a,b</sup> Sayed H. R. Abdi <sup>a,b</sup> and H. C. Bajaj <sup>a,b</sup>

---

<sup>a</sup>Discipline of Inorganic Materials and Catalysis, CSIR-Central Salt and Marine Chemicals Research Institute (CSIR-CSMCRI), Council of Scientific & Industrial Research (CSIR), G. B. Marg, Bhavnagar, 364002, Gujarat, India. <sup>b</sup>Academy of Scientific and Innovative Research (AcSIR), CSIR-Central Salt and Marine Chemicals Research Institute (CSIR-CSMCRI), Council of Scientific & Industrial Research (CSIR), G. B. Marg, Bhavnagar, 364002, Gujarat, India. <sup>c</sup>Analytical Discipline and Centralised Instrumental Facility, CSIR, Central Salt and Marine Chemicals Research Institute (CSMCRI), G. B. Marg, Bhavnagar 364 021, Gujarat, India. E-mail: ganguly@csmcri.org

Tel: +91-0278-2567760, Fax: +91-0278-2566970; E-mail: [khan251293@yahoo.in](mailto:khan251293@yahoo.in)

## Table of Contents

|    |                                                                                           |       |
|----|-------------------------------------------------------------------------------------------|-------|
| 1. | General procedure for the enantioselective Friedel-Crafts reaction using 1-naphthol ..... | 2     |
| 2. | Characterization data for products.....                                                   | 2-8   |
| 3. | <sup>1</sup> H NMR and <sup>13</sup> C NMR spectra of products.....                       | 9-21  |
| 4. | HPLC chromatogram of racemic and chiral compounds.....                                    | 22-35 |
| 5. | Computational study.....                                                                  | 36-65 |
| 6. | References.....                                                                           | 66    |

## 1. General procedure for the enantioselective Friedel-Crafts reaction of 1-naphthol with ketamine:

To a solution of quinine thiourea **5b** (5 mol%) in 2ml of dichloromethane 1-naphthol or 2-naphthol (3 mmol), ketimine (2 mmol) and 50mg of 4Å MS were added under N<sub>2</sub> atm. The reactions was monitored by TLC until the consumption of ketimine and after the completion of the reaction, solvent was removed under reduced pressure and it was subjected to column chromatography using hexane: ethyl acetate (9.5:5) as eluent to afford desired product **8a-8n** in pure form.

## 2. Characterization data for products

(+)-*tert*-butyl (*R*)-(1-benzyl-3-(1-hydroxynaphthalen-2-yl)-2-oxoindolin-3-yl) carbamate<sup>1</sup> (**8a**)

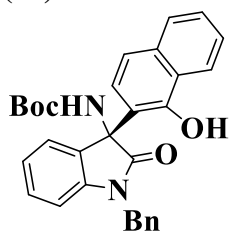

Enantiomeric excess (99%) was determined by chiral HPLC (Chiralpak IA), hexane-*i*PrOH 80:20, 0.75 mL/min, major enantiomer *t*<sub>r</sub> = 40.02 min, minor enantiomer *t*<sub>r</sub> = 11.00 min.

mp 104-105 °C; [ $\alpha$ ]<sub>D</sub><sup>20</sup> +358.5 (*c* 0.44, CHCl<sub>3</sub>) (99% *ee*); <sup>1</sup>H NMR (500 MHz, CDCl<sub>3</sub>)  $\delta$  10.62 (s, 1H), 8.51-8.42 (m, 1H), 7.75-7.66 (m, 1H), 7.56-7.46 (m, 2H), 7.42 (m, 1H), 7.30 (m 1H), 7.27-7.15 (m, 7H), 6.81 (d, *J* = 8.8 Hz, 1H), 6.77 (d, *J* = 7.0 Hz, 1H), 5.81 (s, 1H), 5.06 (d, *J* = 15.9 Hz, 1H), 4.83 (d, *J* = 14.4 Hz, 1H), 1.34 (s, 9H).; <sup>13</sup>C NMR (125 MHz, CDCl<sub>3</sub>)  $\delta$  179.8, 154.1, 153.75, 142.6, 134.9, 134.8, 129.4, 128.8, 127.6, 127.4, 127.0, 126.9, 125.6, 125.3, 125.0, 123.5, 123.1, 119.5, 114.6, 110.2, 80.7, 66.1, 44.4, 28.1.

(+)-*tert*-butyl (*R*)-(3-(1-hydroxynaphthalen-2-yl)-1-methyl-2-oxoindolin-3-yl)carbamate<sup>1</sup> (**8b**)

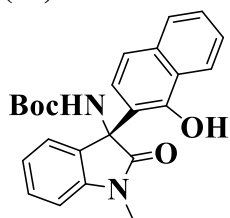

Enantiomeric excess (95%) was determined by chiral HPLC (Chiralpak IA), hexane-*i*PrOH 85:15, 0.75 mL/min, major enantiomer *t*<sub>r</sub> = 12.269 min, minor enantiomer *t*<sub>r</sub> = 13.779 min.

mp 95-99 °C;  $[\alpha]_D^{20} +390.6$  (*c* 0.42, CHCl<sub>3</sub>) (95% *ee*); <sup>1</sup>H NMR (500 MHz, CDCl<sub>3</sub>) δ 10.86 (s, 1H), 8.45-8.43 (m, 1H), 7.50-7.48 (m, 2H), 7.45-7.41 (m, 2H), 7.29-7.25 (m, 1H), 7.16 (d, *J* = 8.5, 0.9 Hz, 1H), 6.95 (d, *J* = 7.5 Hz, 1H), 6.80 (d, *J* = 9 Hz, 1H), 5.69 (s, 1H), 3.24 (s, 3H), 1.28 (s, 9H); <sup>13</sup>C NMR (125 MHz, CDCl<sub>3</sub>) δ 179.5 , 154.2 , 153.8 , 143.4 , 134.8 , 129.5, 129.25, 127.4 , 126.9 , 125.6 , 125.3 , 125.1 , 123.4 , 123.2 , 119.4 , 114.2 , 109.2 , 80.7, 66.1, 28.0 , 26.8.

**(+) *tert*-butyl (R)-(3-(1-hydroxynaphthalen-2-yl)-1-phenyl-2-oxindolin-3-yl)carbamate (8c)**

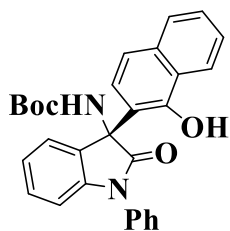

Enantiomeric excess (95%) was determined by chiral HPLC (Chiralpak IA), hexane-*i*PrOH 70:30, 0.7 mL/min, major enantiomer *t*<sub>r</sub> = 30.5 min, minor enantiomer *t*<sub>r</sub> = 13.6 min.

mp 115-117 °C;  $[\alpha]_D^{20} +381.2$  (*c* 0.45, CHCl<sub>3</sub>) (95% *ee*); <sup>1</sup>H NMR (500 MHz, CDCl<sub>3</sub>) δ 10.6 (s, 1H), 8.46-8.41 (m, 1H), 7.79-7.70 (m, 1H), 7.52-7.43 (m, 8H), 7.37-7.30 (m, 3H), 7.21 (s, 1H), 6.94 (s, 1H), 6.91-6.88 (m, 1H), 6.81 (d, *J* = 18, 1H), 5.8 (s, 1H), 1.34(s, 9H).; <sup>13</sup>C NMR (125 MHz, CDCl<sub>3</sub>) δ 168.2, 155.9, 152.6, 144.5, 129.6, 128.5, 127.4, 127.0, 127.2, 126.4, 127.2, 125.8, 125.7, 125.8, 118.0, 111.8, 78.5, 55.5, 51.5, 28.4.

**(+) *tert*-butyl (R)-(3-(1-hydroxynaphthalen-2-yl)-2-oxindolin-3-yl) carbamate (8d)**

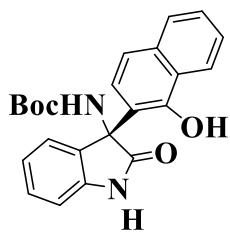

Enantiomeric excess (63%) was determined by chiral HPLC (Chiralpak IA), hexane-*i*PrOH 80:20, 0.7 mL/min, major enantiomer *t*<sub>r</sub> = 20.7 min, minor enantiomer *t*<sub>r</sub> = 9.40 min.

mp 103-106 °C;  $[\alpha]_D^{20} +341.0$  (*c* 0.45, CHCl<sub>3</sub>) (63% *ee*); <sup>1</sup>H NMR (200 MHz, CDCl<sub>3</sub>) 8.46-8.41 (m, 1H), 7.73-7.68 (m, 1H), 7.52-7.47 (m, 2H), 7.41-7.35 (m, 2H), 7.31-7.17 (m, 3H), 6.91-6.80

(m, 2H), 5.78 (s, 1H), 1.34 (s, 9H);  $^{13}\text{C}$  NMR (75.5 MHz,  $\text{CDCl}_3$ )  $\delta$  179.5, 155.5, 152.6, 143.3, 127.8, 127.4, 127.2, 126.4, 125.7, 125.6, 125.0, 124.8, 120.2, 118.0, 78.2, 50.8, 28.

**(+)-*tert*-butyl (*R*)-(1-benzyl-5-fluoro-3-(1-hydroxynaphthalen-2-yl)-2-oxoindolin-3-yl) carbamate (8e)**

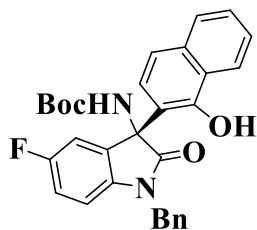

Enantiomeric excess (99%) was determined by chiral HPLC (Chiralpak IA), hexane-*i*PrOH 85:15, 0.7 mL/min, major enantiomer  $t_r$  = 45.71 min, minor enantiomer  $t_r$  = 16.09 min.

mp 155-157 °C;  $[\alpha]_D^{20}$  +382.2 (*c* 0.42,  $\text{CHCl}_3$ ) (96% *ee*);  $^1\text{H}$  NMR (500 MHz,  $\text{CDCl}_3$ )  $\delta$  10.7 (s, 1H), 8.46-8.44 (m, 1H), 7.79-7.70 (m, 1H), 7.52-7.50 (m, 2H), 7.46-7.44 (m, 1H), 7.25-7.16 (m, 6H), 6.98-6.95 (m, 1H), 6.77 (d, *J* = 9 Hz, 1H), 6.66-6.64 (m, 1H), 5.92 (d, *J* = 20 Hz, 1H), 5.00 (d, *J* = 15 Hz, 1H), 4.81 (s, 1H), 1.36 (s, 9H);  $^{13}\text{C}$  NMR (125 MHz,  $\text{CDCl}_3$ )  $\delta$  179.6, 160.7, 158.7, 154.1, 151.7, 138.4, 134.9, 128.8, 127.7, 127.6, 127.1, 127.0, 120.3, 119.9, 115.9, 115.8, 114.0, 113.5, 113.3, 111.2, 111.1, 108.5, 81.1, 66.3, 44.5, 28.2.

**(+)-*tert*-butyl (*R*)-(1-benzyl-7-fluoro-3-(1-hydroxynaphthalen-2-yl)-2-oxoindolin-3-yl) carbamate<sup>1</sup> (8f)**

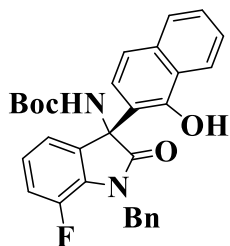

Enantiomeric excess (99%) was determined by chiral HPLC (Chiralpak IA), hexane-*i*PrOH 60:40, 07 mL/min, major enantiomer  $t_r$  = 21.67 min, minor enantiomer  $t_r$  = 9.12 min.

$[\alpha]_D^{20}$  +405 (*c* 0.35,  $\text{CHCl}_3$ ) (99% *ee*);  $^1\text{H}$  NMR (500 MHz,  $\text{CDCl}_3$ )  $\delta$  10.6 (s, 1H), 8.46-8.44 (m, 1H), 7.79-7.77 (m, 2H), 7.70-7.69 (m, 1H), 7.51-7.49 (m, 2H), 7.46-7.44 (m, 1H), 7.40-7.38 (m, 1H), 7.23-7.16 (m, 8H), 7.07-7.03 (m, 1H), 6.74-6.73 (s, 1H), 6.71-6.69 (s, 1H), 6.02-5.90 (d, 1H), 5.14-5.11 (d, 1H), 4.99-4.96 (d, 1H), 1.33 (s, 9H). 1.35;  $^{13}\text{C}$  NMR (125 MHz,  $\text{CDCl}_3$ )  $\delta$  178.5,

153.08, 153.0, 150.7, 148.1, 146.1, 135.0, 133.9, 127.5, 126.5, 126.0, 125.3, 124.8, 124.7, 124.0, 123.7, 123.3, 123.2, 122.2, 120.7, 120.1, 119.2, 118.8, 116.8, 113.0, 107.4, 80.1, 65.3, 45.1, 27.1.

**(+)-*tert*-butyl (*R*)-(1-benzyl-6-chloro-3-(1-hydroxynaphthalen-2-yl)-2-oxoindolin-3-yl)carbamate<sup>1</sup> (8g)**

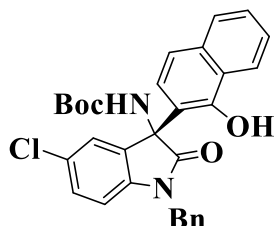

Enantiomeric excess (99%) was determined by chiral HPLC (Chiralpak IA), hexane-*i*PrOH 60:40, 0.7 mL/min, major enantiomer  $t_r = 33.065$  min, minor enantiomer  $t_r = 13.619$  min.

mp 115-118 °C;  $[\alpha]_D^{20} +412.8$  ( $c$  0.35, CHCl<sub>3</sub>) (99% *ee*); <sup>1</sup>H NMR (500 MHz, CDCl<sub>3</sub>)  $\delta$  10.68 (s, 1H), 8.45-8.43 (m, 1H), 7.70-7.69 (m, 1H), 7.51-7.49 (m, 2H), 7.33 (s, 1H), 7.25-7.17 (m, 7H), 6.76 (d,  $J = 8.5$ , Hz, 1H), 6.65 (d,  $J = 8.5$ , 1H), 5.91 (s, 1H), 4.93 (d, 1H), 1.36 (s, 9H). <sup>13</sup>C NMR (125 MHz, CDCl<sub>3</sub>)  $\delta$  178.4, 153.07, 152.94, 140.09, 133.4, 128.4, 128.0, 127.8, 126.6, 126.1, 126.0, 124.8, 124.6, 122.2, 118.9, 112.8, 110.4, 80.11, 65.14, 43.5, 27.20.

**(+)-*tert*-butyl (*R*)-(1-benzyl-3-(1-hydroxynaphthalen-2-yl)-5-nitro-2-oxoindolin-3-yl)carbamate<sup>1</sup> (8h)**

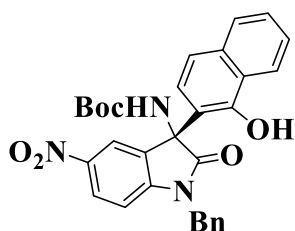

Enantiomeric excess (99%) was determined by chiral HPLC (Chiralpak IA), hexane-*i*PrOH 70:30, 1 mL/min, major enantiomer  $t_r = 15.879$  min, minor enantiomer  $t_r = 10.205$  min.

mp 145-147 °C;  $[\alpha]_D^{20} +499.1$  ( $c$  0.25, CHCl<sub>3</sub>) (99% *ee*); <sup>1</sup>H NMR (500 MHz, CDCl<sub>3</sub>)  $\delta$  10.35 (s, 1H), 8.45-8.43 (m, 1H), 8.31 (d,  $J = 5$  Hz, 1H), 8.25 (m, 1H), 7.71-7.69 (m, 1H), 7.55-7.50 (m, 2H), 7.18 (d,  $J = 10$ , 1H), 6.83 (d,  $J = 8.5$ , 1H), 6.65 (d,  $J = 9$ ), 6.08 (s, 1H), 4.99 (s, 1H), 1.39 (s, 9H); <sup>13</sup>C NMR (125 MHz, CDCl<sub>3</sub>)  $\delta$  179.2, 152.9, 147.0, 143.1, 133.9, 132.7, 129.4, 128.0,

127.08, 126.8, 126.1, 126.0, 125.4, 125.02, 123.13, 122.11, 119.9, 119.3, 111.8, 109.18, 80.49, 64.7, 43.8, 30.5, 27.18, 21.6.

**(+)-tert-butyl (R)-(1-benzyl-5-bromo-3-(1-hydroxynaphthalen-2-yl)-2-oxoindolin-3-yl) carbamate<sup>1</sup> (8i)**

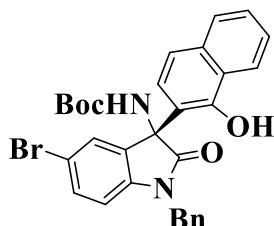

Enantiomeric excess (97%) was determined by chiral HPLC (Chiralpak IA), hexane-*i*PrOH 85:15, 0.75 mL/min, major enantiomer  $t_r = 34.53$  min, minor enantiomer  $t_r = 13.66$  min. mp 117-120 °C;  $[\alpha]_D^{20} +419.2$  ( $c$  0.27, CHCl<sub>3</sub>) (97% *ee*); <sup>1</sup>H NMR (500 MHz, CDCl<sub>3</sub>)  $\delta$  10.65 (s, 1H), 8.46-8.45 (m, 1H), 7.75-7.73 (m, 1H), 7.53-7.52 (m, 4H), 7.42-7.40 (m, 1H), 7.23-7.22(m, 8H), 6.79(d,  $J = 9$ , 1H), 6.63 (d,  $J = 8$ , 1H), 5.82 (s, 1H), 4.98 (d,  $J = 12.5$ , 1H), 1.37 (s, 9H). <sup>13</sup>C NMR (125 MHz, CDCl<sub>3</sub>)  $\delta$  178.3 , 153.0 , 140.5, 133.3, 131.3, 127.8, 127.4, 126.7, 126.0, 125.9, 124.7, 123.6, 122.19, 118.9, 115.3, 112.8, 110.8, 107.6, 80.1, 65.07, 43.5, 27.17.

**(+)-tert-butyl (R)-(1-benzyl-6-bromo-3-(1-hydroxynaphthalen-2-yl)-2-oxoindolin-3-yl) carbamate<sup>1</sup> (8j)**

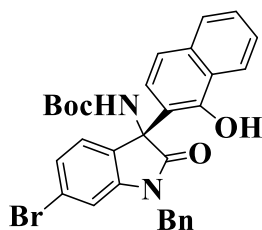

Enantiomeric excess (97%) was determined by chiral HPLC (Chiralpak IA), hexane-*i*PrOH 60:40, 0.7 mL/min, major enantiomer  $t_r = 18.43$  min, minor enantiomer  $t_r = 11.52$  min. mp 115-120 °C;  $[\alpha]_D^{20} +390$  ( $c$  0.27, CHCl<sub>3</sub>) (97% *ee*); <sup>1</sup>H NMR (500 MHz, CDCl<sub>3</sub>)  $\delta$  10.6 (s, 1H), 8.46-8.44 (m, 1H), 8.18-8.16 (s, 1H), 7.80-7.78 (m, 1H), 7.72-7.71(m, 1H), 7.52-7.50 (m, 2H), 7.48-7.46(m, 1H), 7.40 (d,  $J = 10$ , 1H), 7.38-7.36 (m, 1H), 7.29-7.21 (m, 2H), 7.24-7.17 (m, 6H), 6.88 (s, 1H), 6.76 (s, 1H), 6.75(d, 1H), 5.02 (d,  $J = 15$  Hz, 1H), 4.75 (s, 1H), 1.35 (s, 9H).; <sup>13</sup>C NMR (125 MHz, CDCl<sub>3</sub>)  $\delta$  178.7, 153.04, 152.9, 150.5, 142.8, 133.9, 133.7, 133.2, 127.9, 126.8, 126.6, 126.0,

125.9, 125.5, 125.4, 125.3, 124.8, 124.8, 124.14, 123.7, 122.1, 122.0, 120.6, 119.4, 118.9, 112.8, 112.7, 107.5, 80.2, 64.8, 43.5, 27.1.

**(+)-*tert*-butyl (*R*)-(1-benzyl-3-(1-hydroxynaphthalen-2-yl)-5-methoxy-2-oxindolin-3-yl) carbamate<sup>1</sup> (8k)**

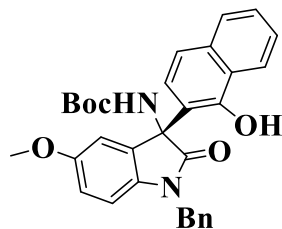

Enantiomeric excess (97%) was determined by chiral HPLC (Chiralpak IA), hexane-*i*PrOH 70:30, 0.7 mL/min, major enantiomer  $t_r$  = 19.94 min, minor enantiomer  $t_r$  = 14.53 min.

mp 100-103 °C;  $[\alpha]_D^{20}$  +385.9 ( $c$  0.325, CHCl<sub>3</sub>) (97% *ee*); <sup>1</sup>H NMR (500 MHz, CDCl<sub>3</sub>)  $\delta$  10.9 (s, 1H), 8.46-8.45 (m, 1H), 7.71-7.70 (m, 1H), 7.51-7.49 (m, 2H), 7.24-7.18 (m, 7H), 7.02 (d,  $J$  = 2.5 Hz, 1H), 6.85 (d,  $J$  = 9 Hz, 1H), 6.81-6.78 (dd, 1H), 6.65 (d,  $J$  = 8.5 Hz, 1H), 5.83 (s, 1H), 5.02 (d,  $J$  = 15.8 Hz, 1H), 4.85 (d,  $J$  = 14.1 Hz, 1H), 3.81 (s, 3H), 1.34 (s, 9H); <sup>13</sup>C NMR (125 MHz, CDCl<sub>3</sub>)  $\delta$  179.4, 156.6, 154.1, 135.8, 134.9, 130.6, 128.7, 127.6, 127.4, 127.0, 125.6, 125.0, 123.2, 119.6, 114.6, 113.6, 112.7, 110.8, 80.7, 66.4, 55.8, 44.5, 28.2.

**(+)-*tert*-butyl (*R*)-(1-benzyl-3-(4-chloro-1-hydroxynaphthalen-2-yl)-2-oxindolin-3-yl) carbamate<sup>1</sup> (8l)**

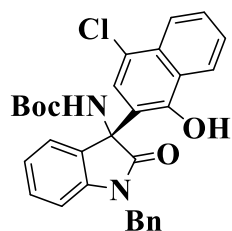

Enantiomeric excess (95%) was determined by chiral HPLC (Chiralpak IA), hexane-*i*PrOH 70:30, 1 mL/min, major enantiomer  $t_r$  = 13.38 min, minor enantiomer  $t_r$  = 7.66 min.

mp 116-117 °C;  $[\alpha]_D^{20}$  +331.1 ( $c$  0.35, CHCl<sub>3</sub>) (95% *ee*); <sup>1</sup>H NMR (500 MHz, CDCl<sub>3</sub>)  $\delta$  11.00 (s, 1H), 8.43 (d,  $J$  = 8.5, 1H), 8.19-8.16 (m, 1H), 8.05 (d,  $J$  = 13 Hz, 1H), 7.62-7.57 (m, 2H), 7.53-7.50 (m, 1H), 7.43 (d,  $J$  = 7, 1H), 7.31-7.18 (m, 8H), 6.89 (s, 1H), 6.76 (d,  $J$  = 7.5, 1H), 6.56 (d,  $J$  = 5, 1H), 6.02 (s, 1H), 5.04 (d,  $J$  = 10, 1H), 4.8 (s, 1H), 1.32 (s, 9H); <sup>13</sup>C NMR (125 MHz, CDCl<sub>3</sub>)  $\delta$  178.5, 153.07, 152.2, 150.1, 141.5, 133.6, 130.7, 130.4, 128.8, 127.8, 127.5, 126.9, 126.7, 126.3,

126.0, 125.4, 124.8, 124.6, 124.2, 123.8, 123.2, 122.9, 122.6, 121.8, 121.6, 121.4, 113.6, 109.6, 107, 80.1, 64.8, 43.5, 27.7.

**(+)-*tert*-butyl (*R*)-(1-benzyl-3-(4-methoxy-1-hydroxynaphthalen-2-yl)-2-oxoindolin-3-yl) carbamate (8m)**

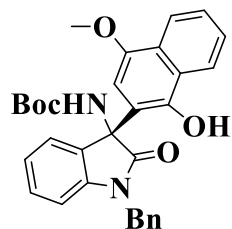

Enantiomeric excess (97%) was determined by chiral HPLC (Chiralpak IA), hexane-*i*PrOH 70:30, 0.7 mL/min, major enantiomer  $t_r$  = 18.29 min, minor enantiomer  $t_r$  = 13.203 min.

$[\alpha]_D^{20} +301.1$  ( $c$  0.35,  $\text{CHCl}_3$ ) (97% *ee*);  $^1\text{H NMR}$  (500 MHz,  $\text{CDCl}_3$ )  $\delta$  10.34 (s, 1H), 8.42-8.41 (m, 1H), 8.21-8.10 (m, 1H), 7.55-7.50 (m, 2H), 7.44 (d,  $J$  = 7 Hz, 1H), 7.24-7.20 (m, 7H), 6.78 (d,  $J$  = 7.5, 1H), 6.14 (s, 1H), 5.03 (d,  $J$  = 15 Hz, 1H), 4.8 (s, 1H), 3.6 (s, 3H), 1.33 (s, 9H). ;  $^{13}\text{C NMR}$  (125 MHz,  $\text{CDCl}_3$ )  $\delta$  179.6, 153.9, 148.9, 147.7, 142.6, 134.9, 129.5, 128.7, 127.8, 127.6, 127.0, 126.8, 126.6, 126.3, 125.0, 123.2, 123.0, 121.3, 113.7, 110.4, 103.5, 80.7, 66.2, 55.4, 44.4, 28.1.

**(-)-*tert*-butyl (*R*)-(1-benzyl-3-(2-hydroxynaphthalen-1-yl)-2-oxoindolin-3-yl)carbamate<sup>1</sup> (8n)**

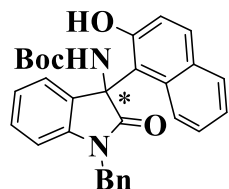

Enantiomeric excess (92%) was determined by chiral HPLC (Chiralpak IA), hexane-*i*PrOH 80:20, 1 mL/min, major enantiomer  $t_r$  = 26.062 min, minor enantiomer  $t_r$  = 16.269 min.

mp 140-142 °C;  $[\alpha]_D^{20} -15$  ( $c$  0.28,  $\text{CHCl}_3$ ) (92% *ee*);  $^1\text{H NMR}$  (500 MHz,  $\text{CDCl}_3$ )  $\delta$  9.7 (s, 1H), 7.66 (m, 1H), 7.50 (d,  $J$  = 8.5, 1H), 7.35-7.33 (m, 3H), 7.24-7.19 (m, 5H), 7.06 (d,  $J$  = 8.5, 1H), 7.00-6.97 (m, 1H), 6.75 (d,  $J$  = 7.5, 1H), 5.89 (s, 1H), 5.08 (d,  $J$  = 15, 1H), 4.88-4.84 (m, 1H), 1.30 (s, 9H).;  $^{13}\text{C NMR}$  (125 MHz,  $\text{CDCl}_3$ )  $\delta$  178.6, 153.9, 152.9, 142.06, 134.2, 130.8, 129.2, 128.3, 127.9, 127.7, 126.5, 126.2, 124.6, 124.1, 123.4, 122.3, 121.3, 119.8, 113.7, 108.9, 79.6, 64.2, 43.6, 27.1.



**<sup>1</sup>H NMR and <sup>13</sup>C NMR spectra of products:**

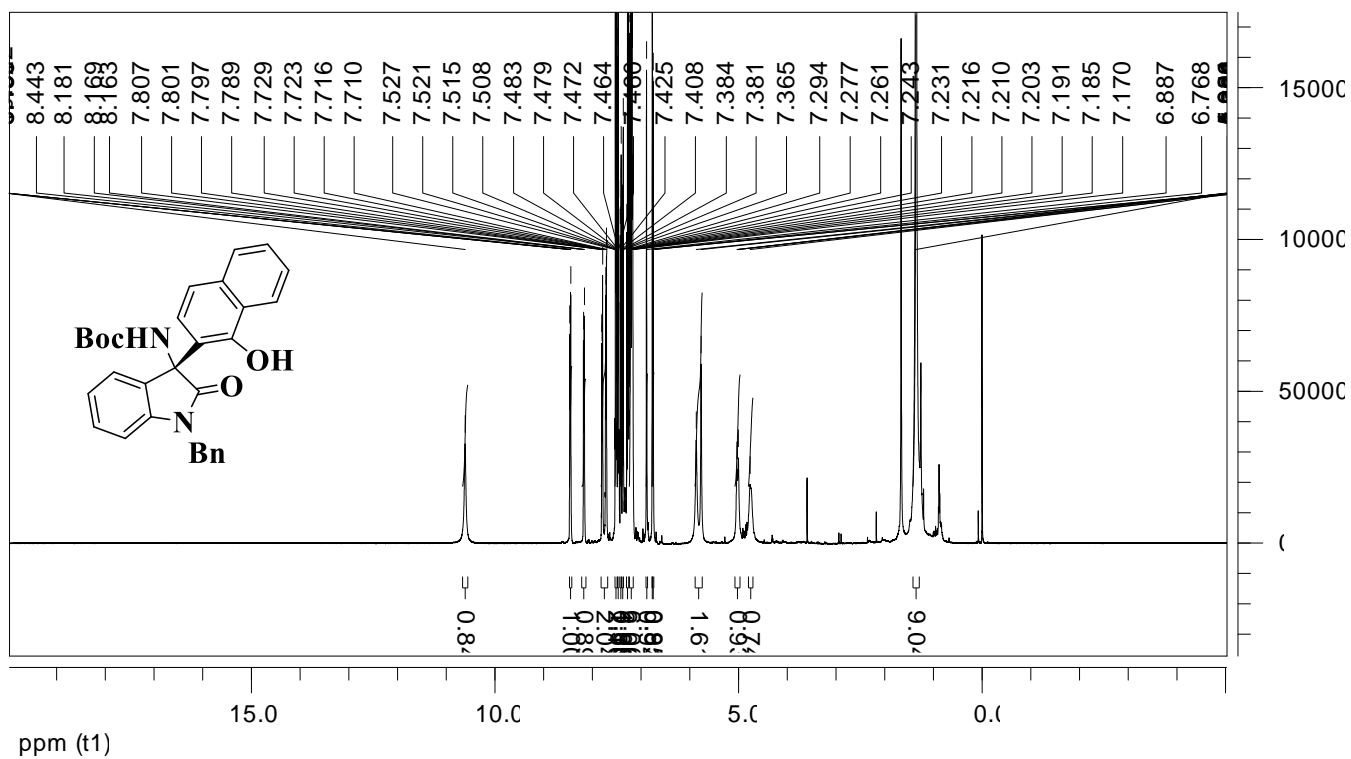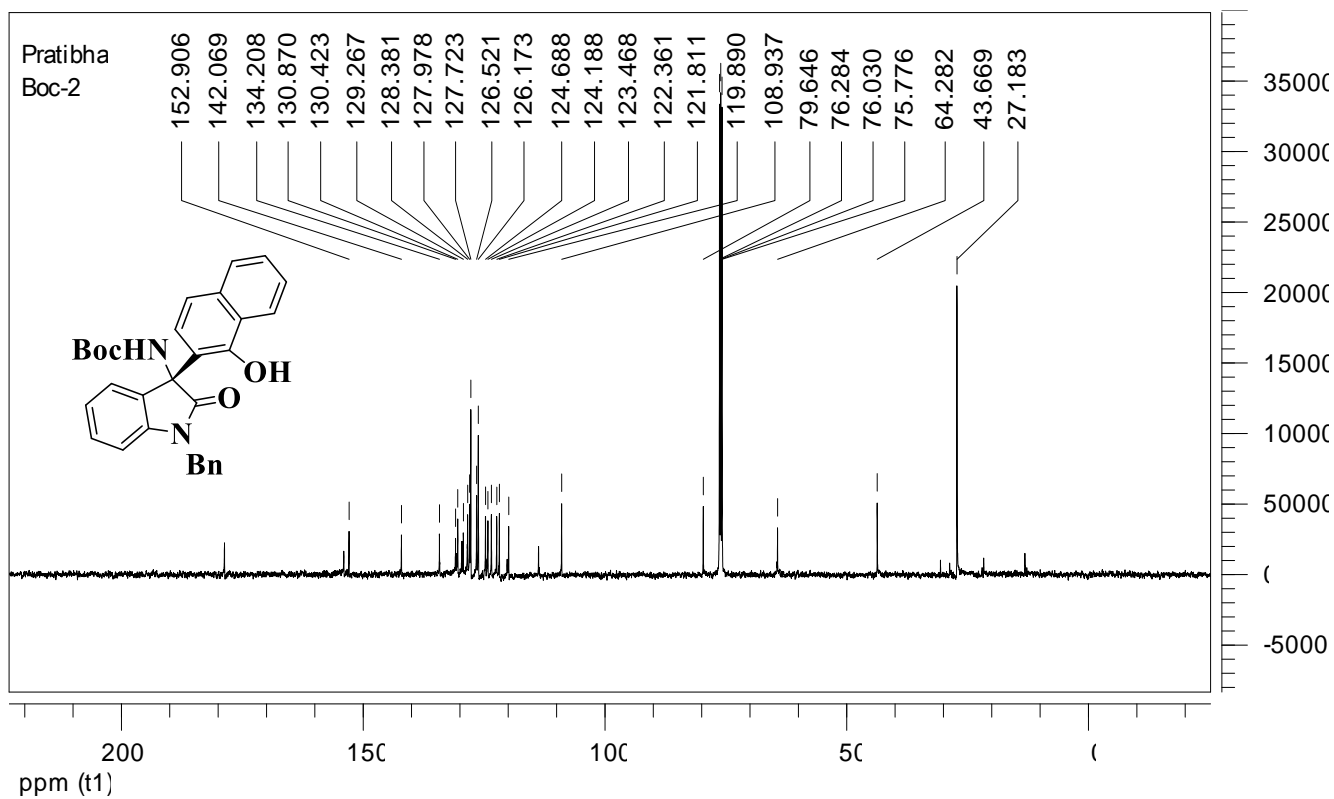

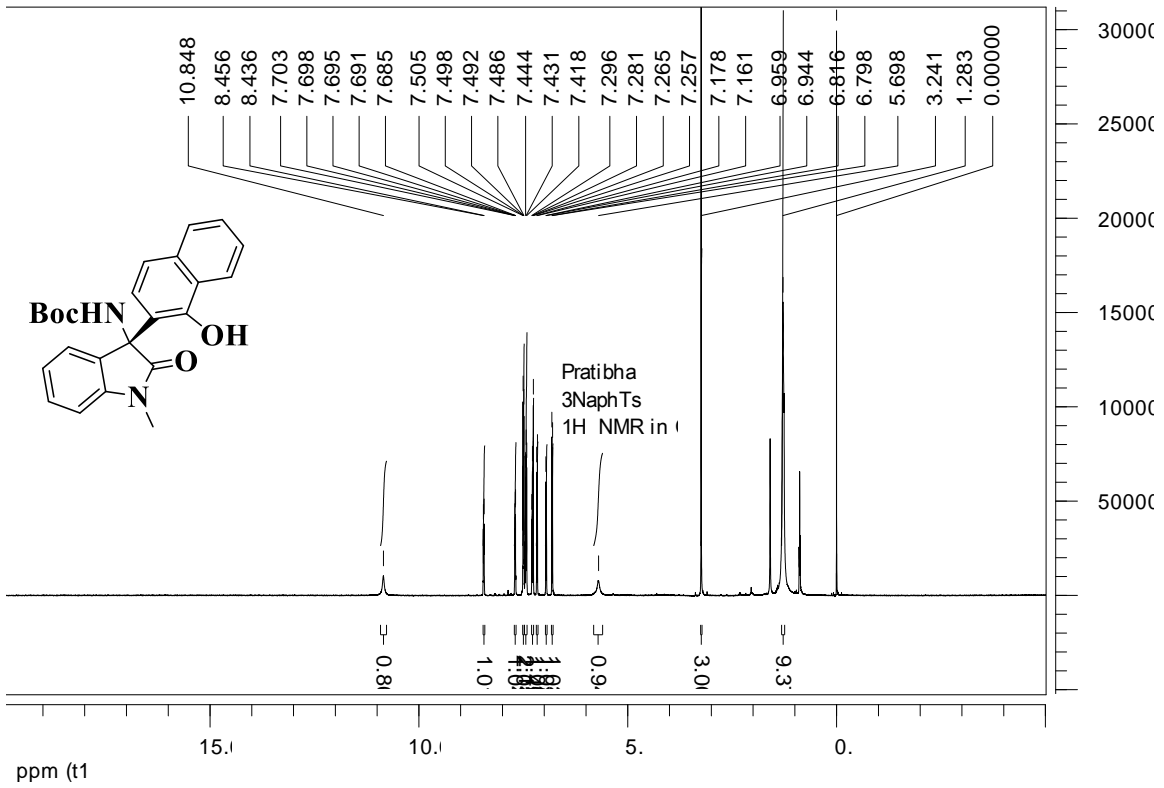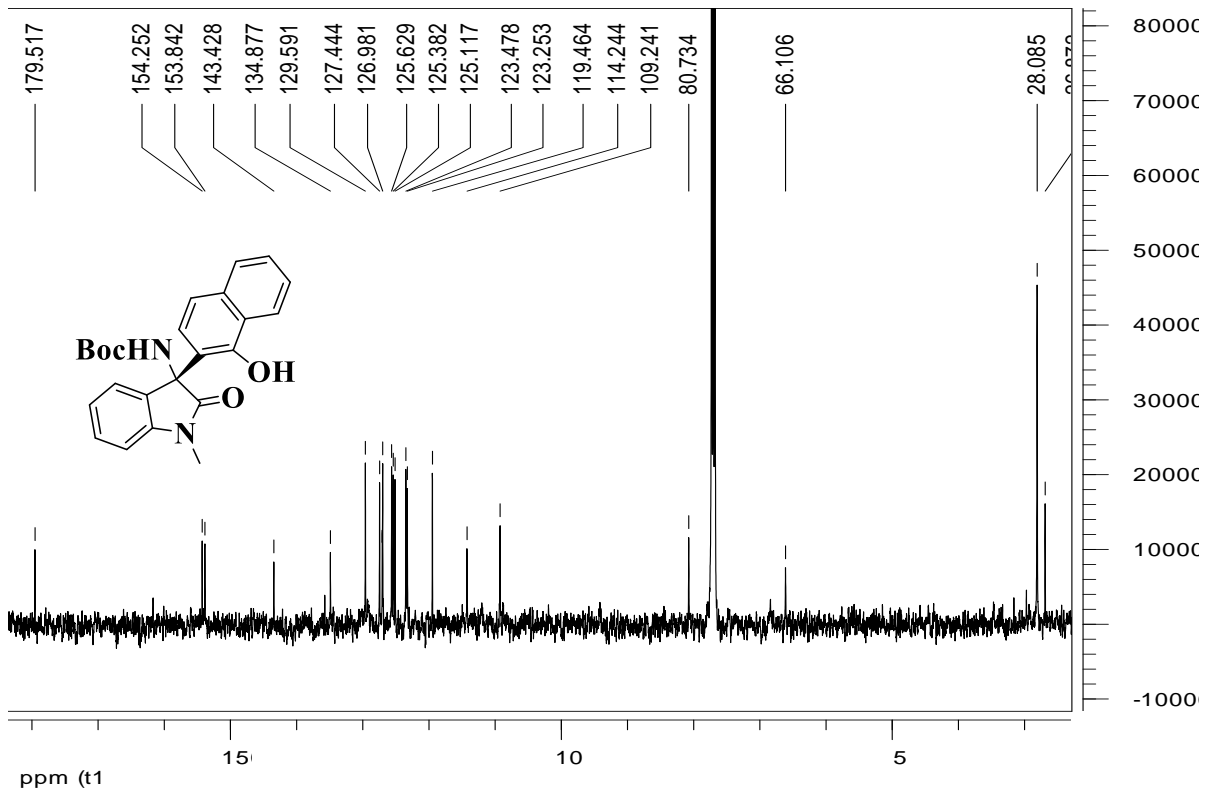

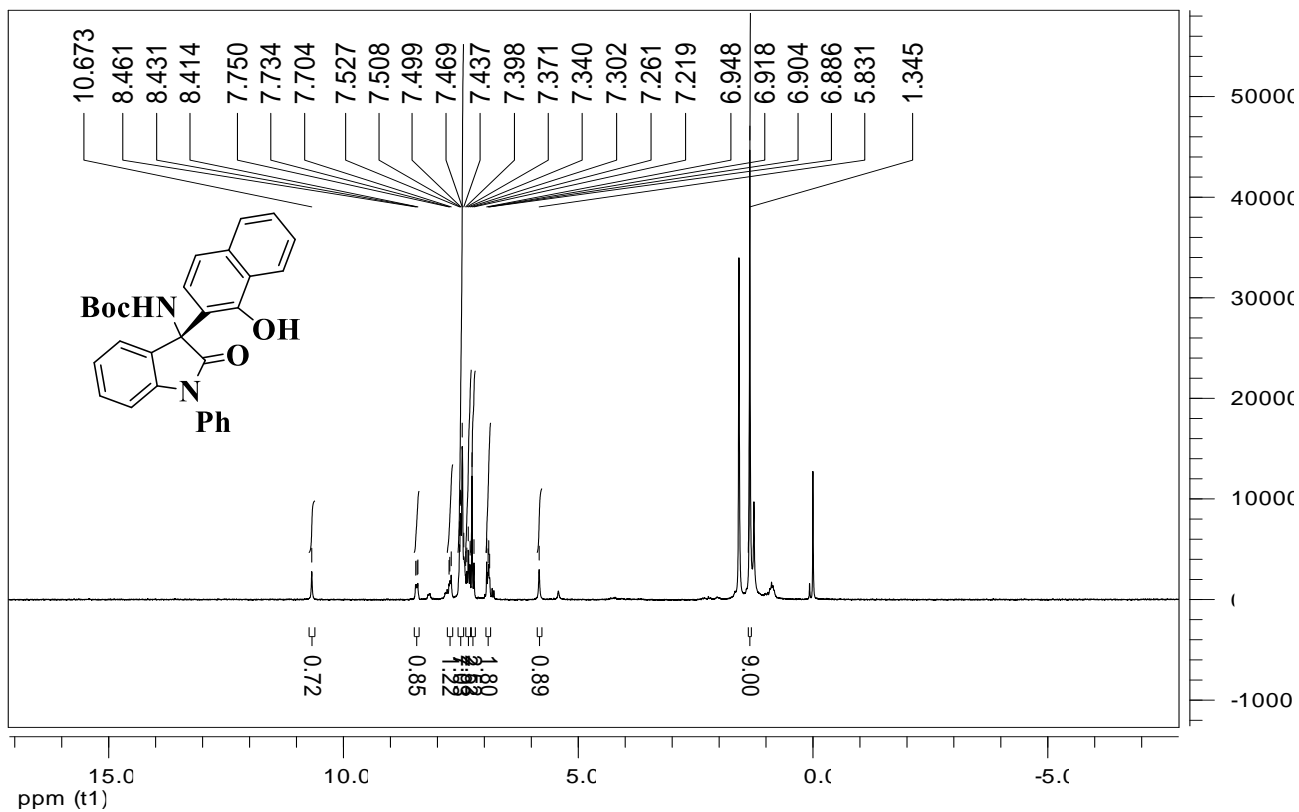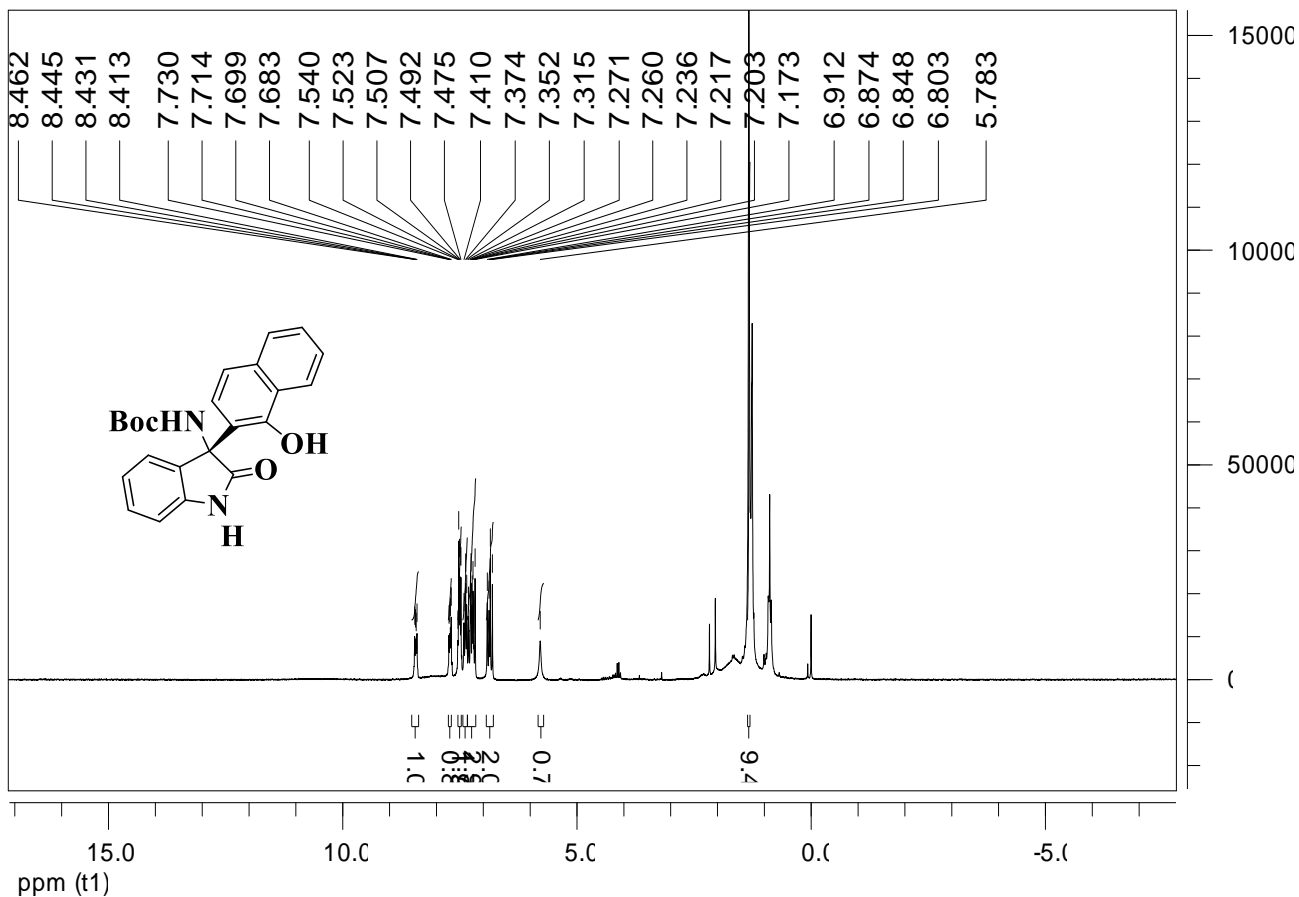

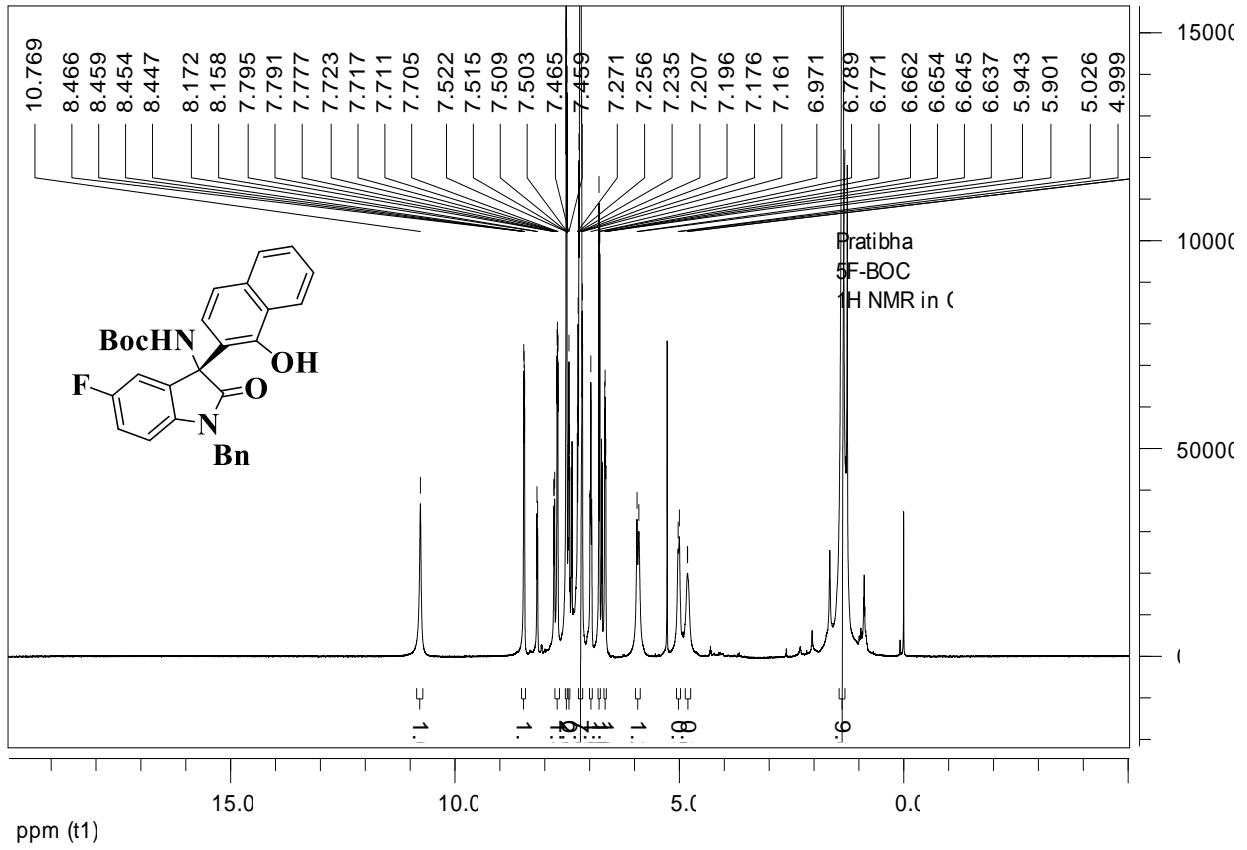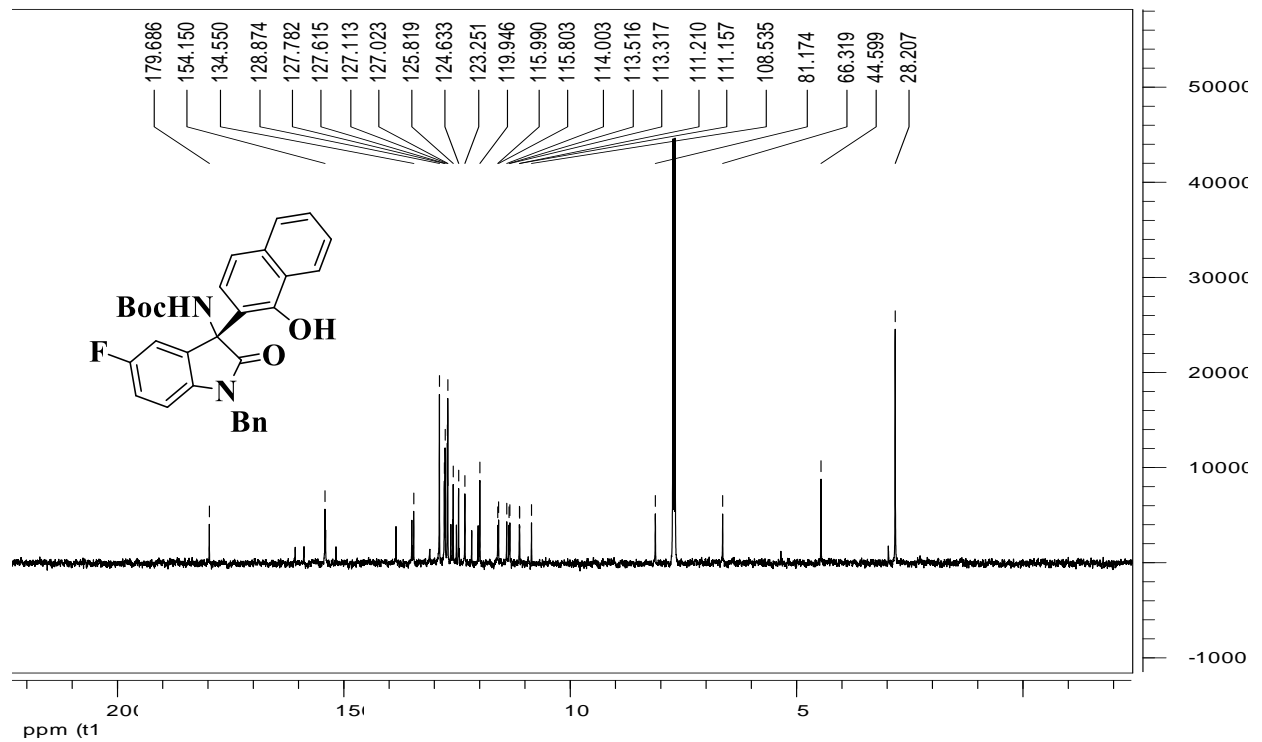

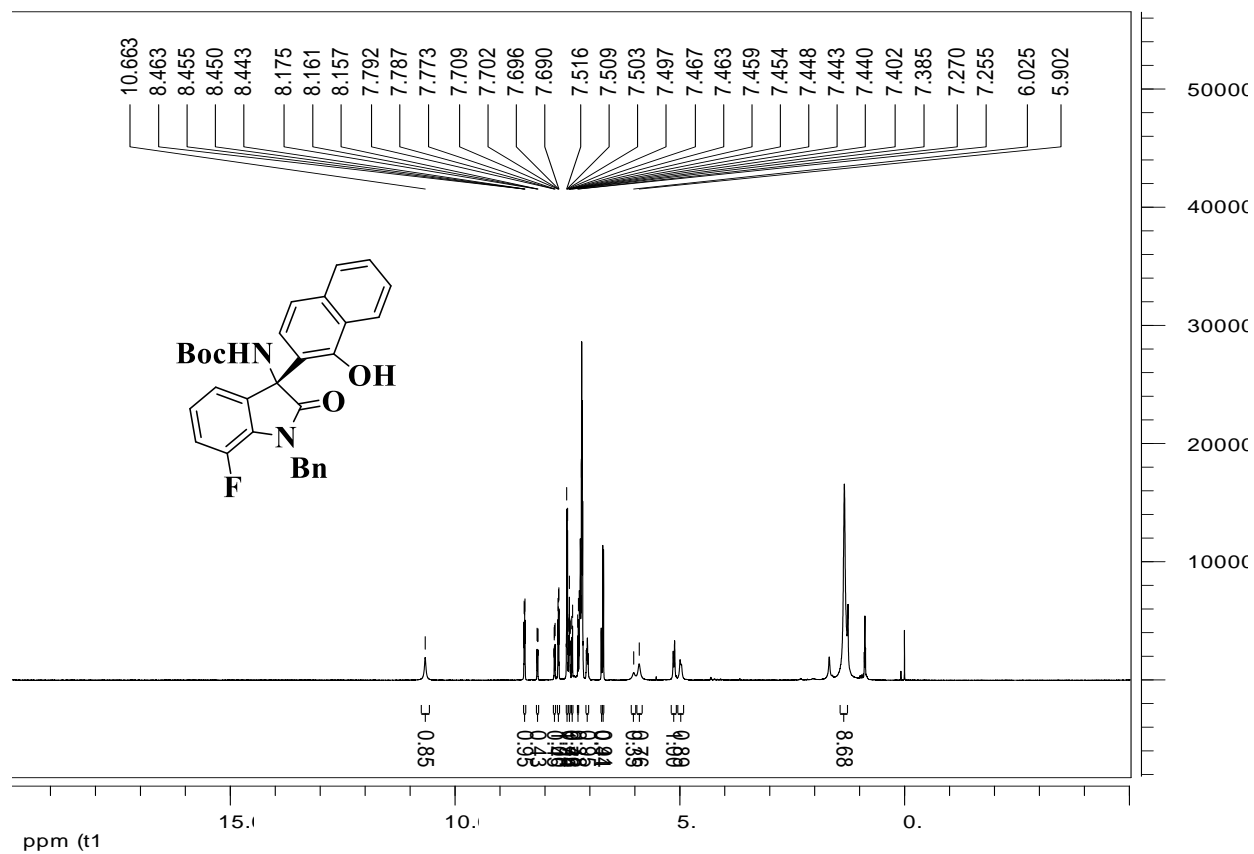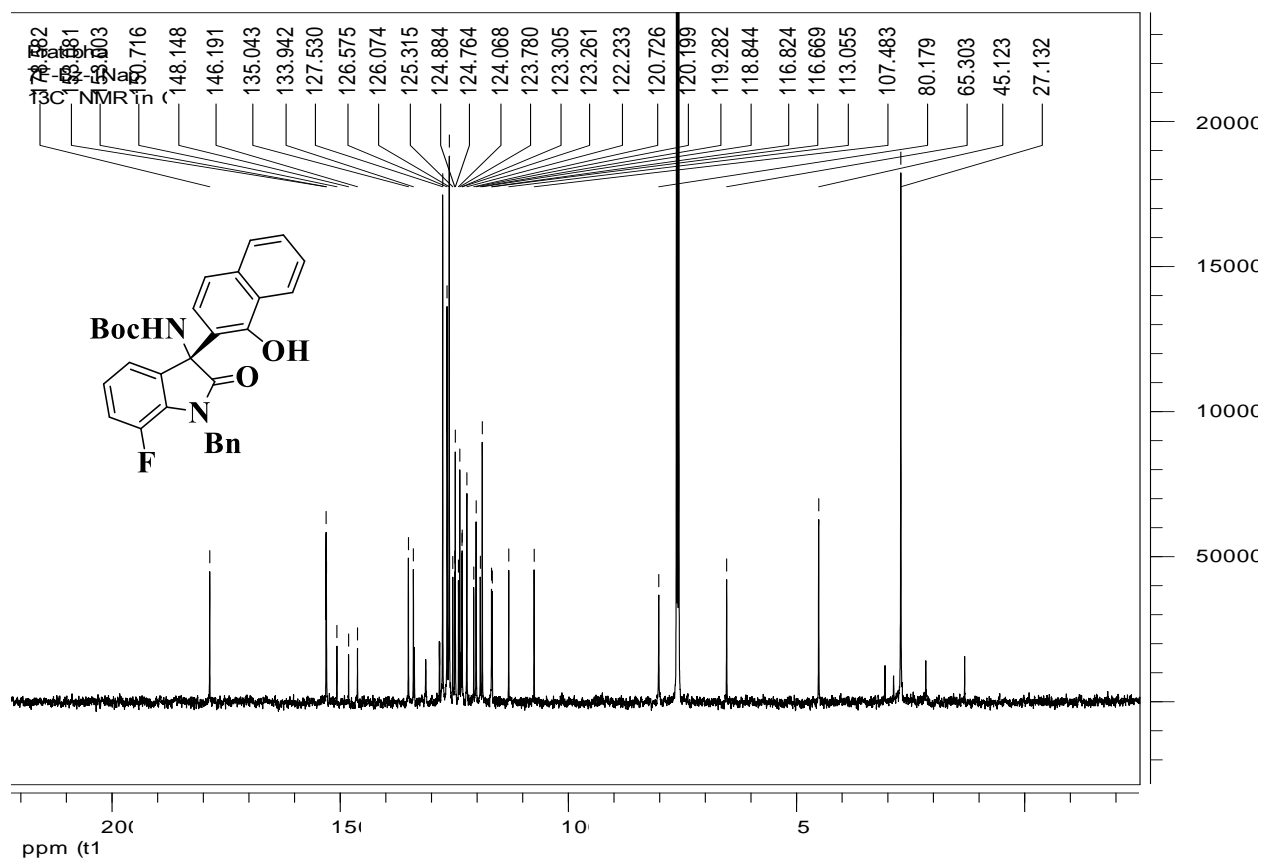

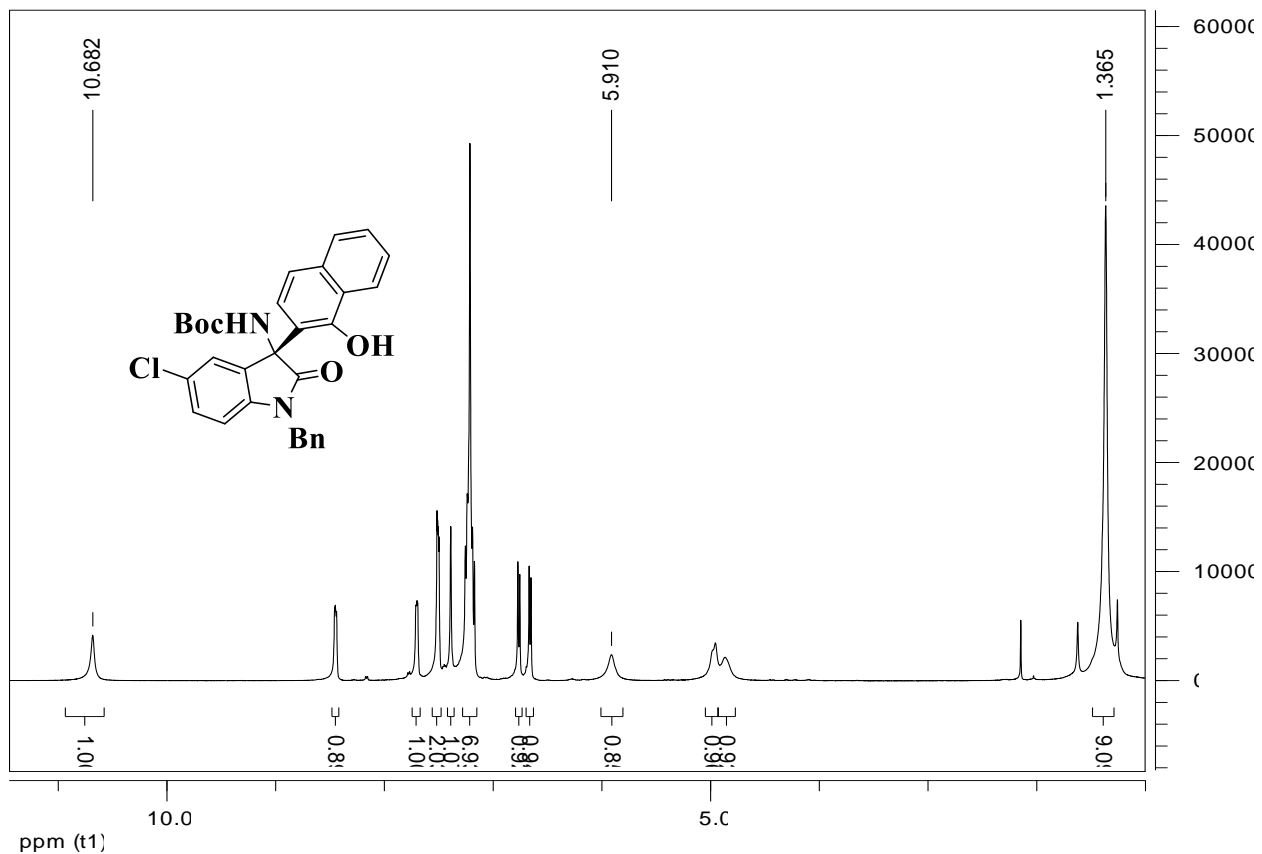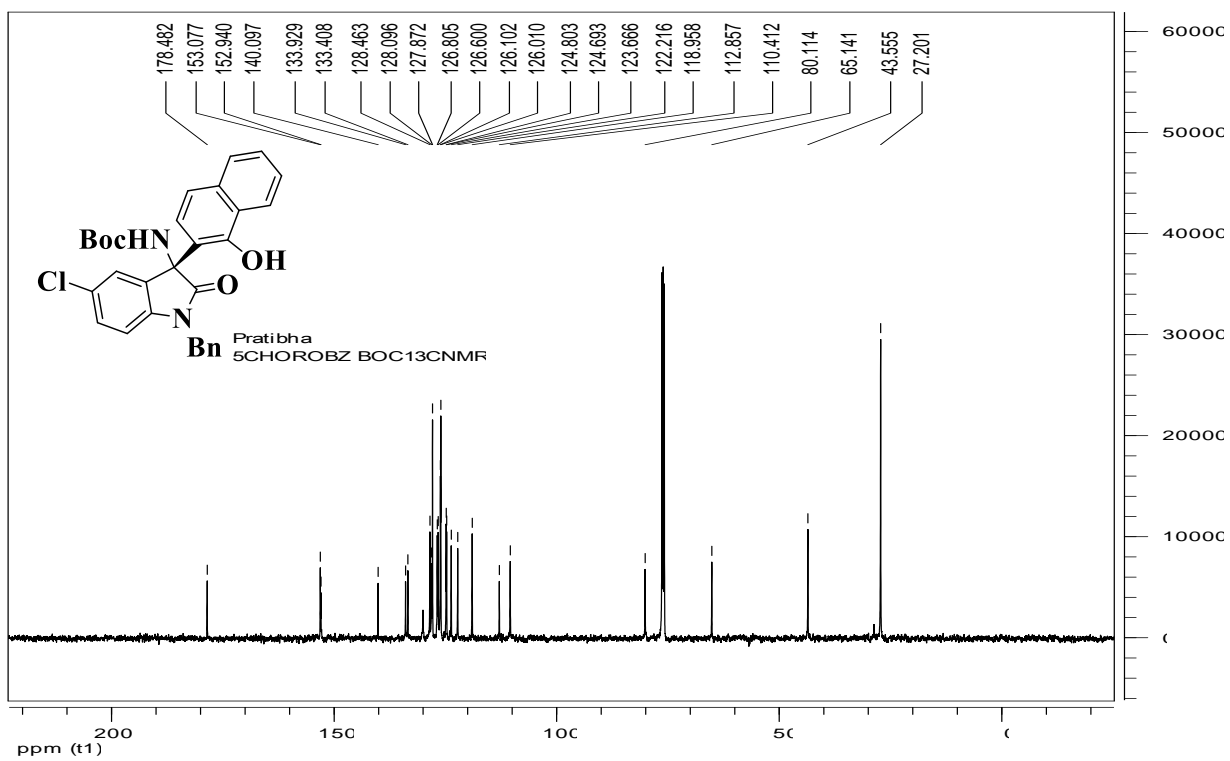

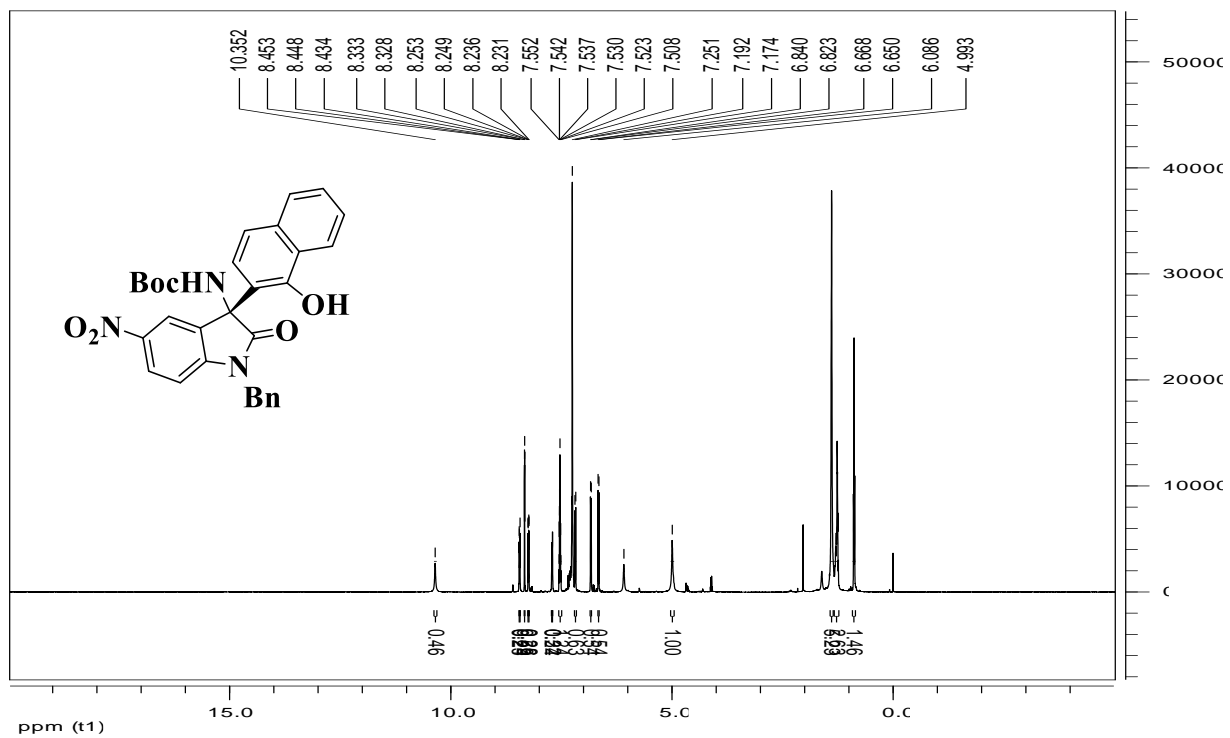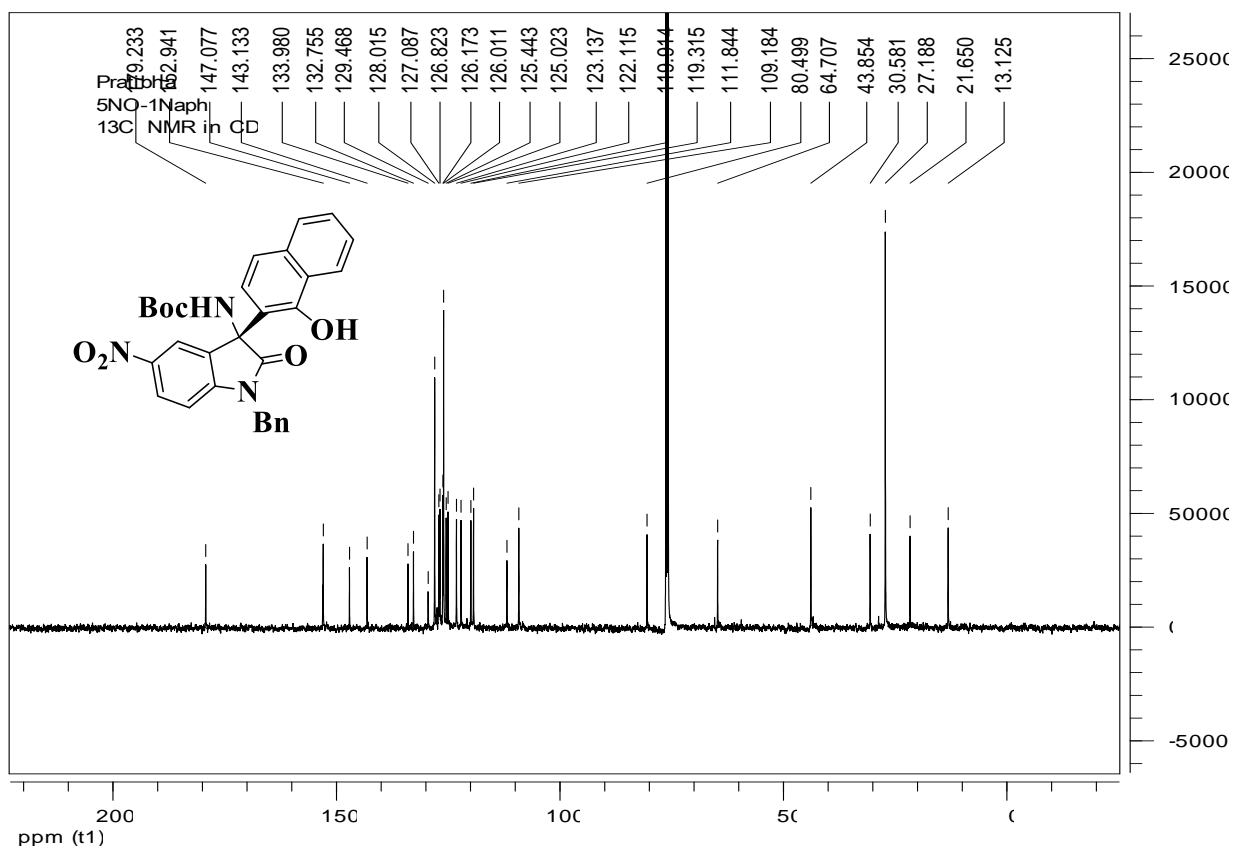

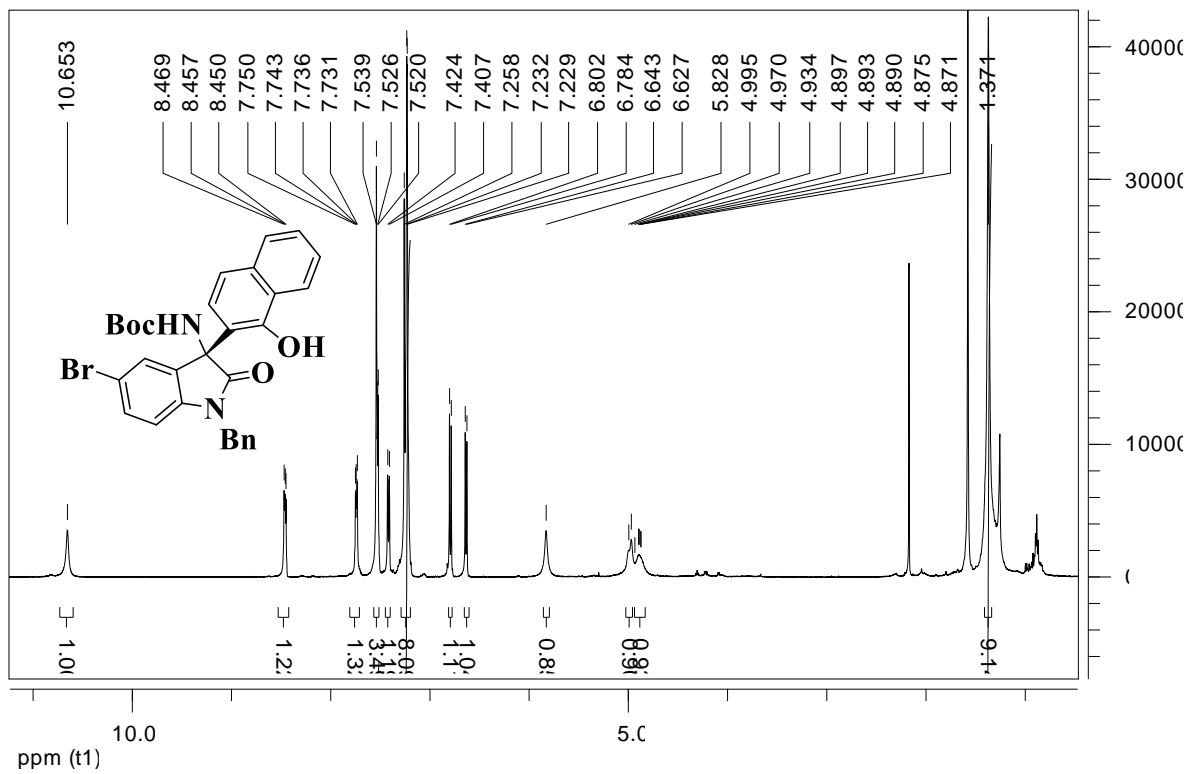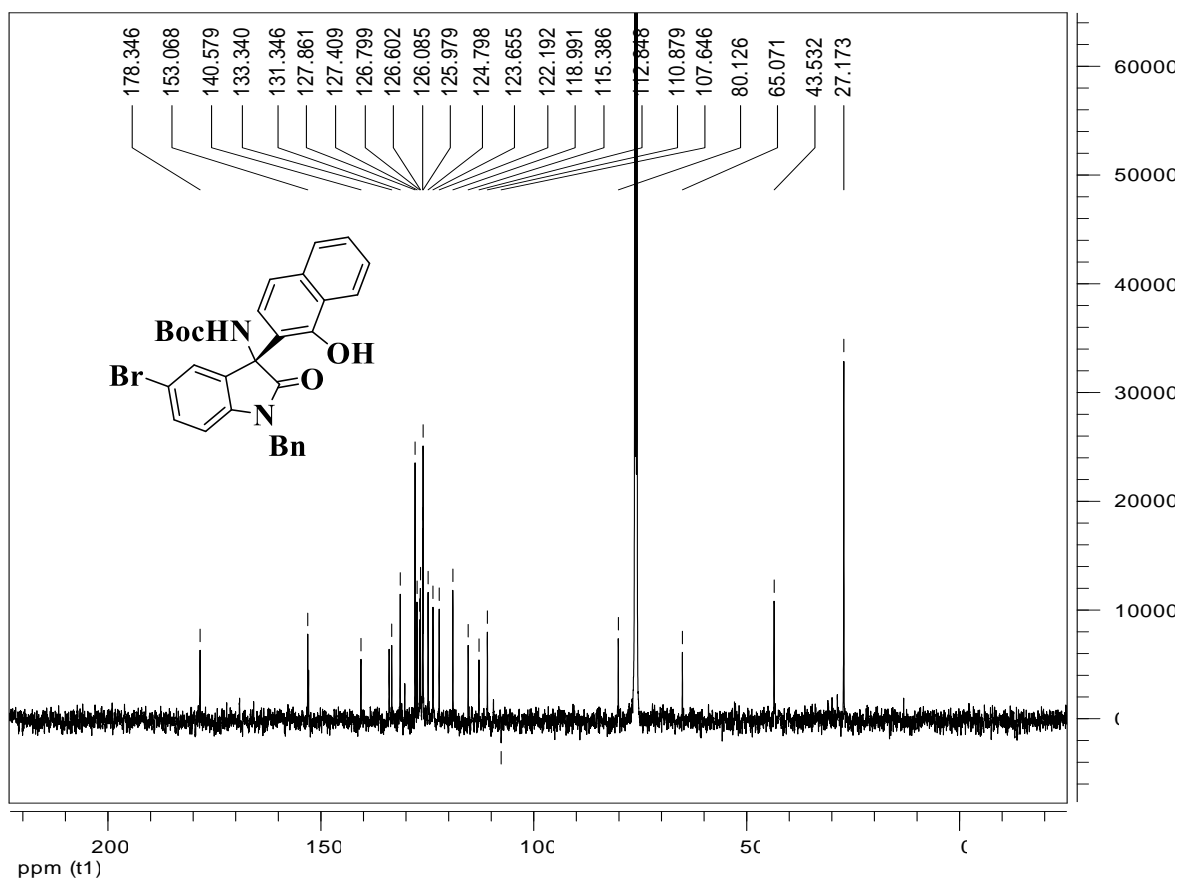



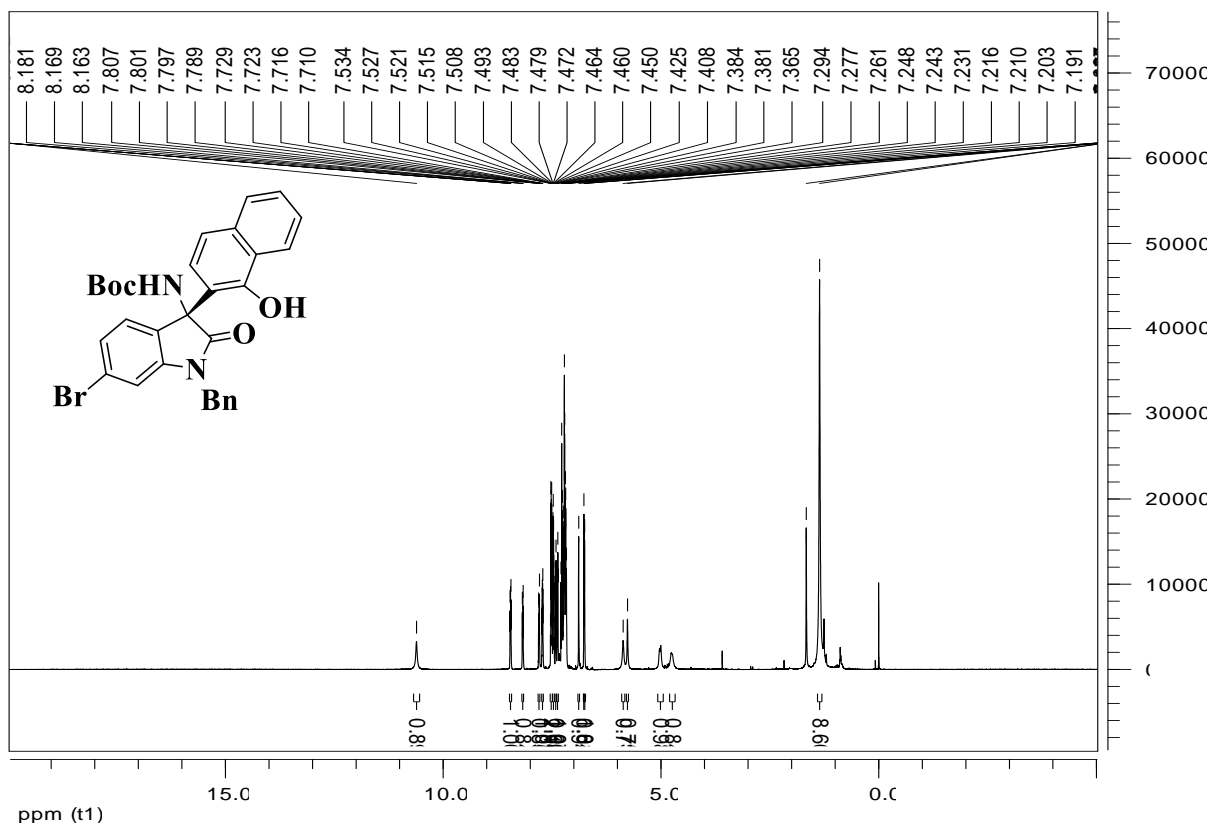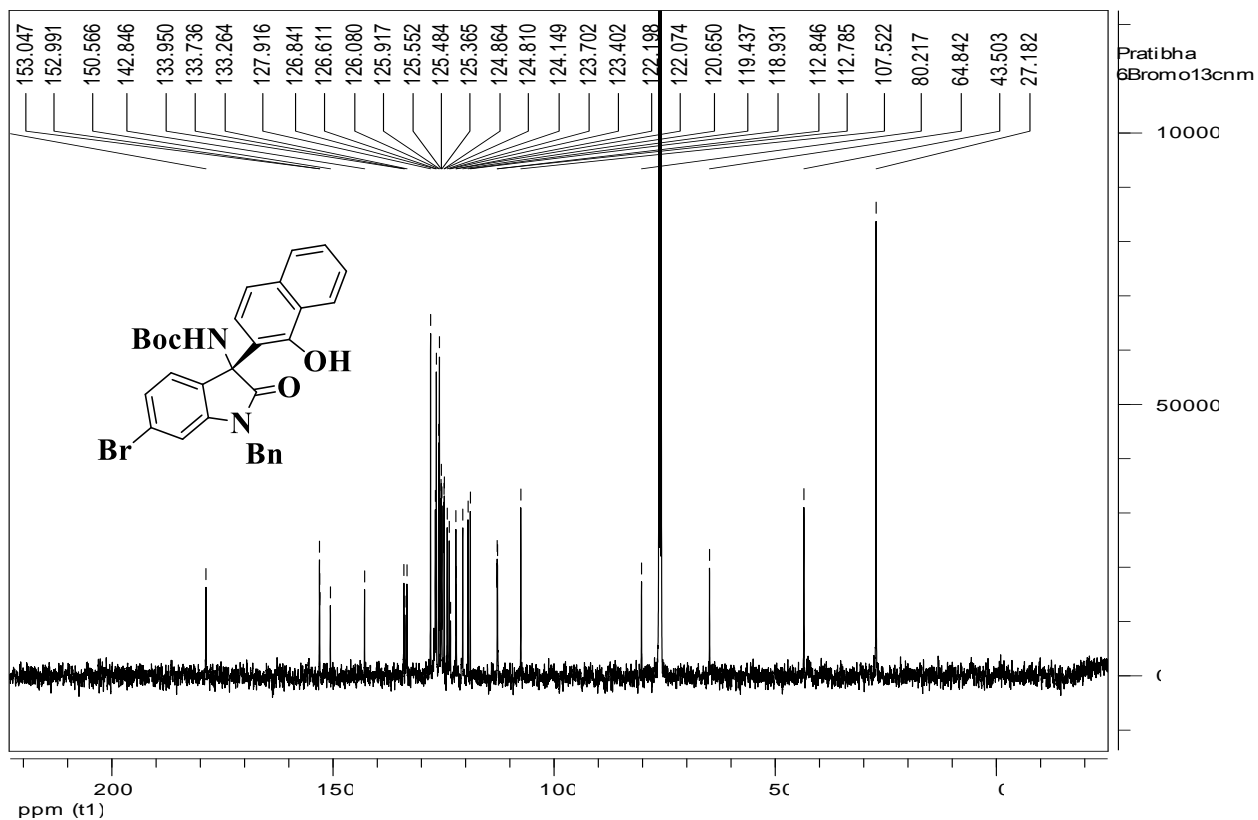

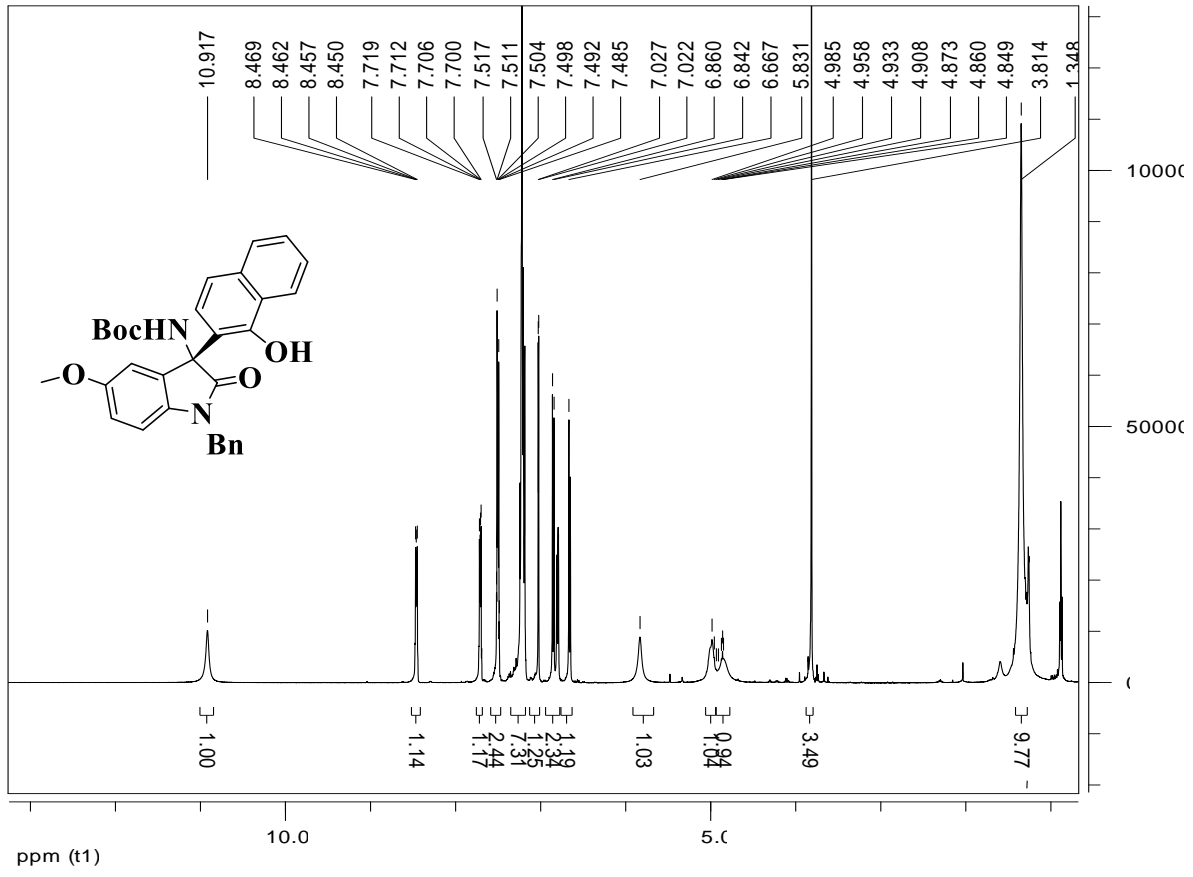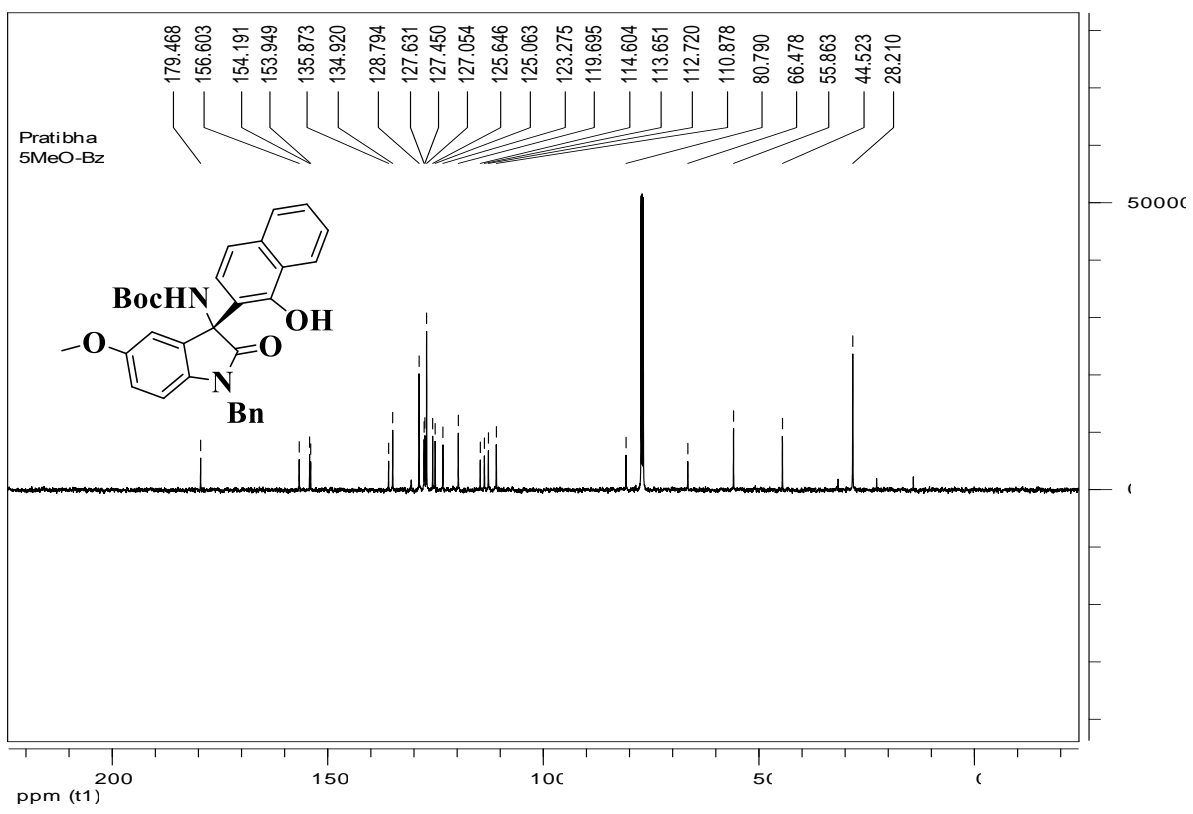

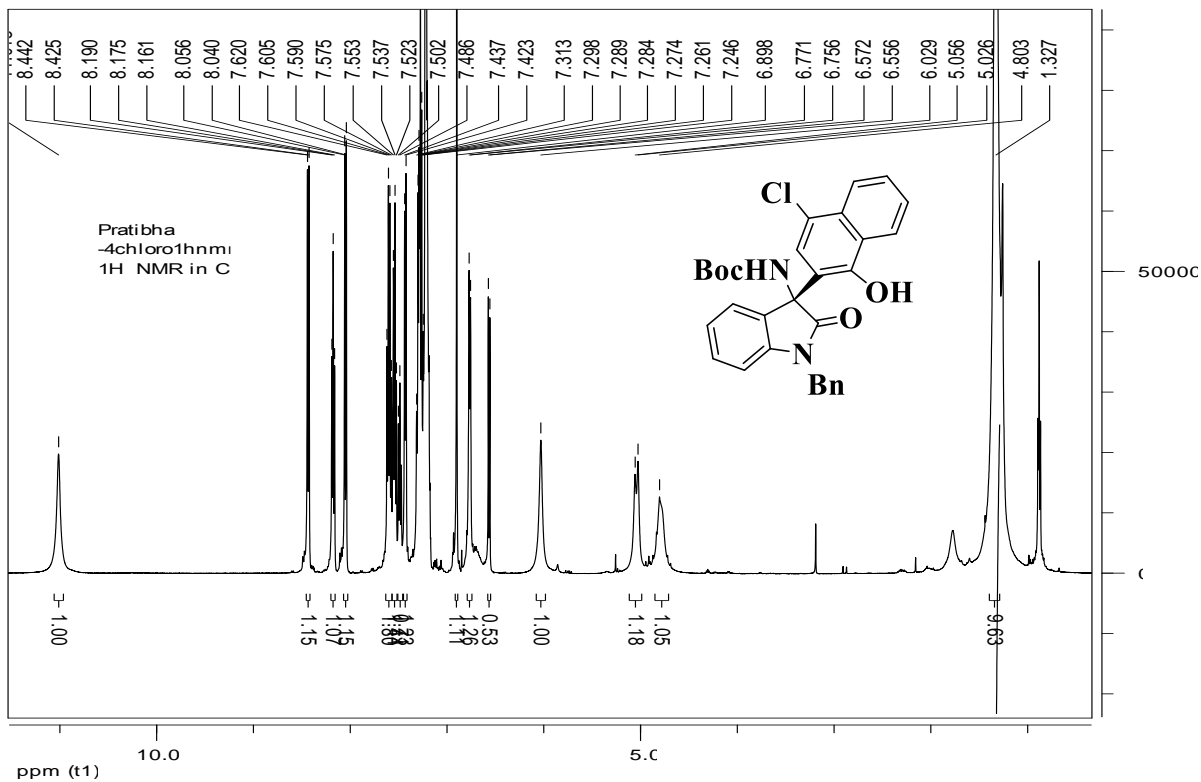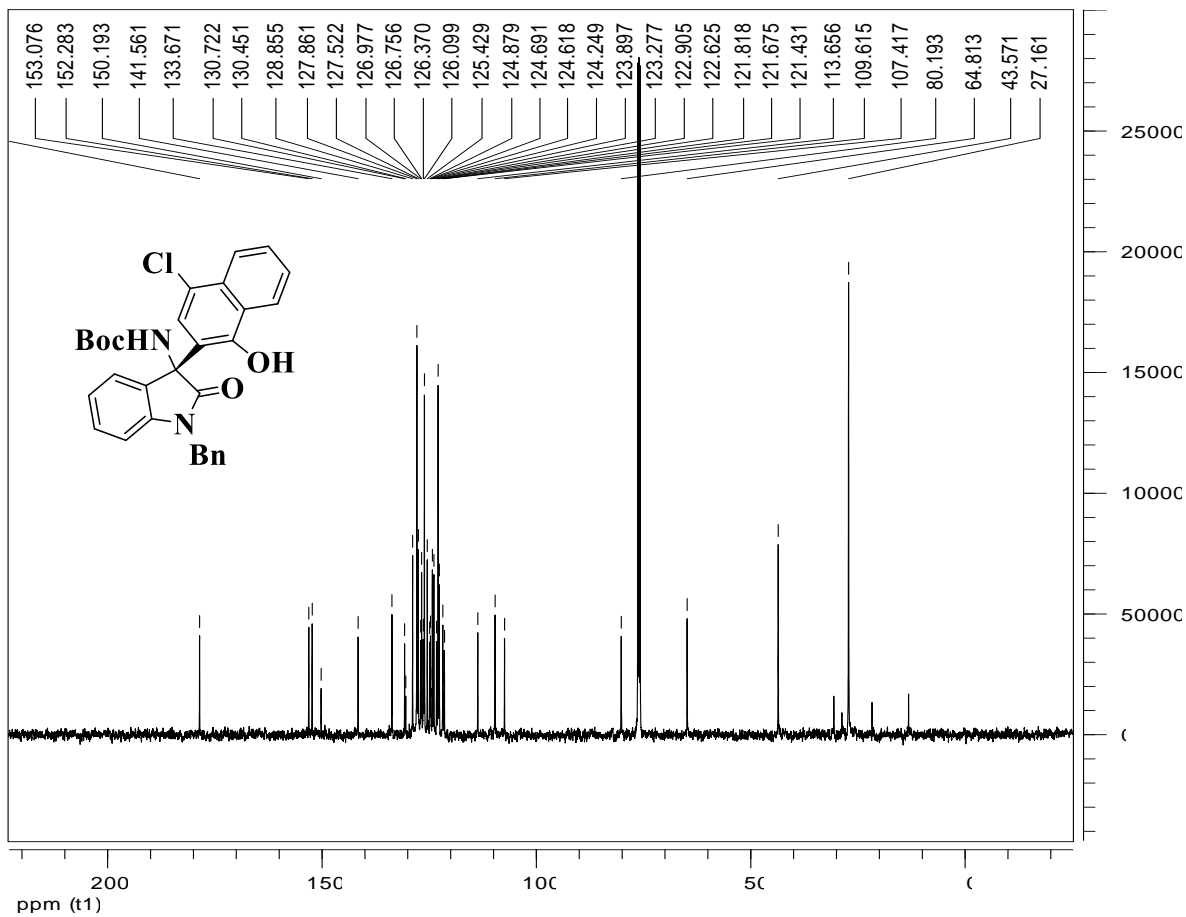

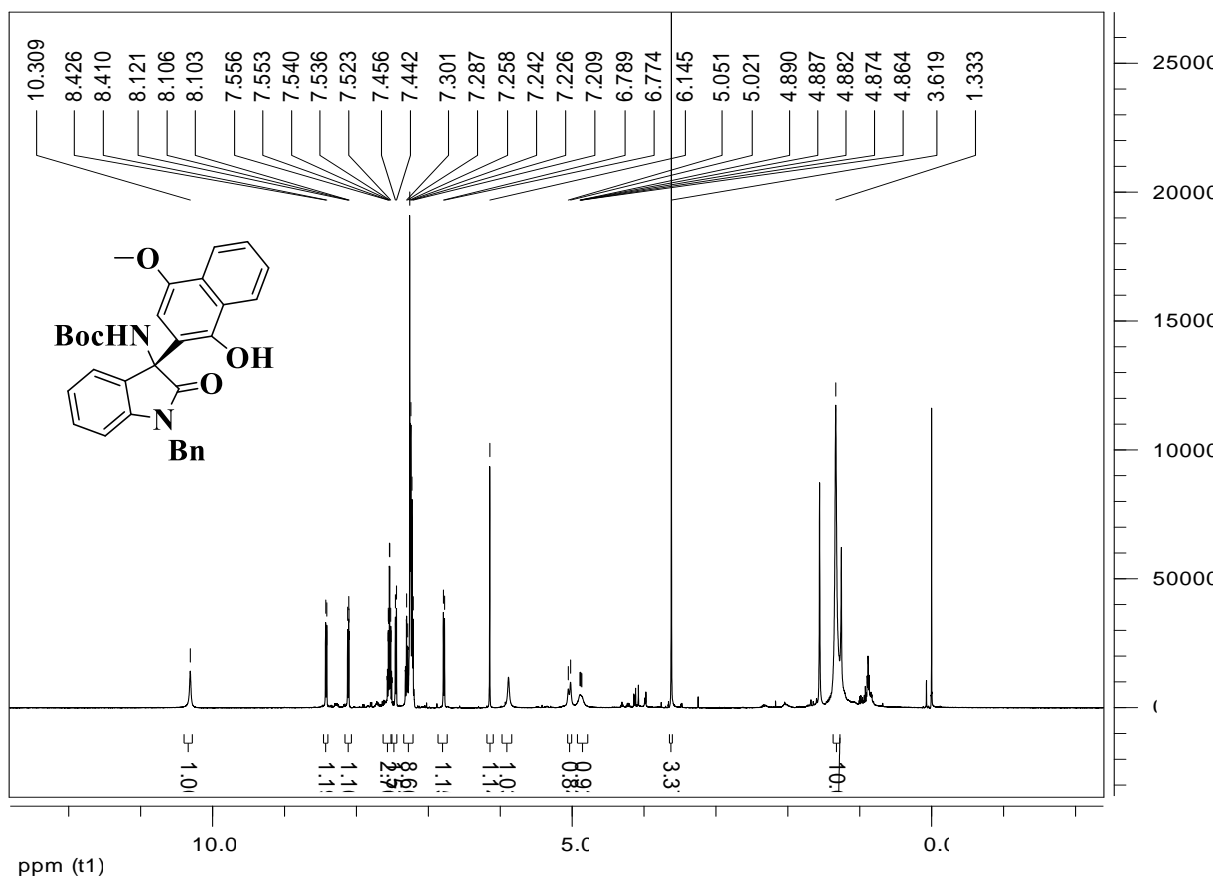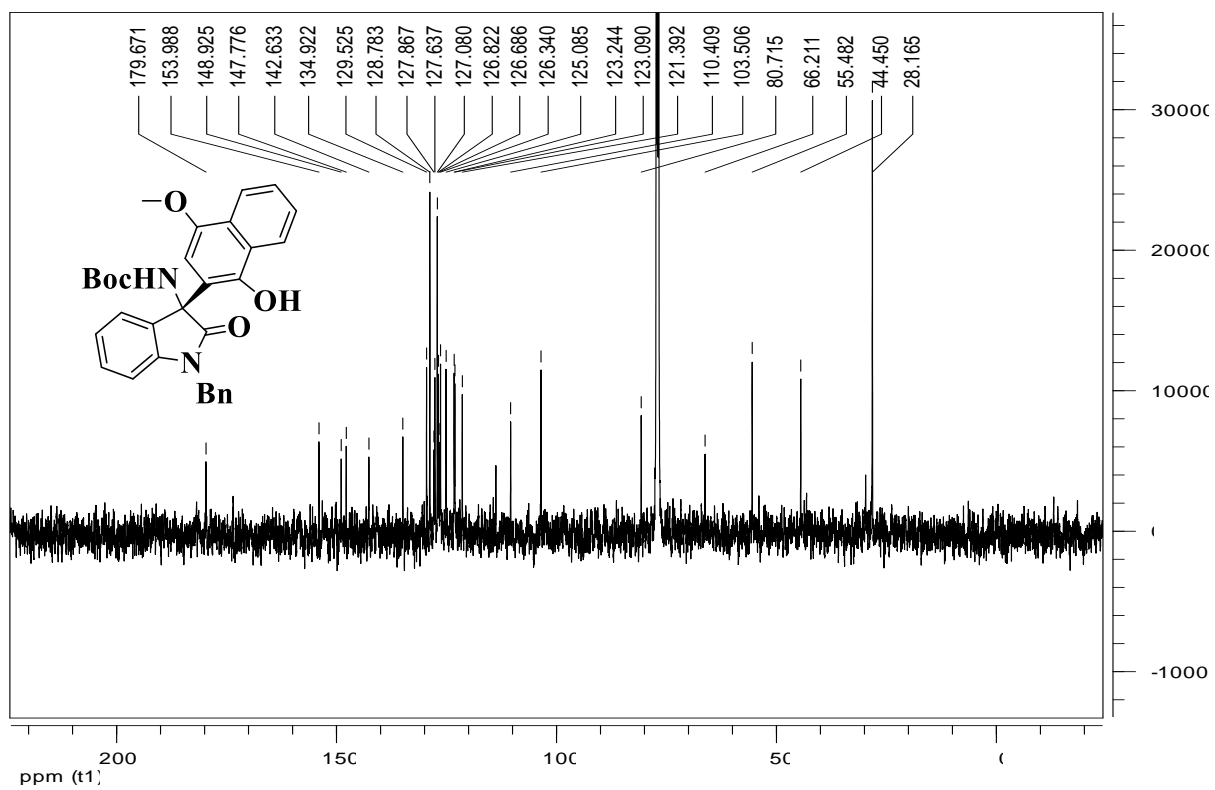

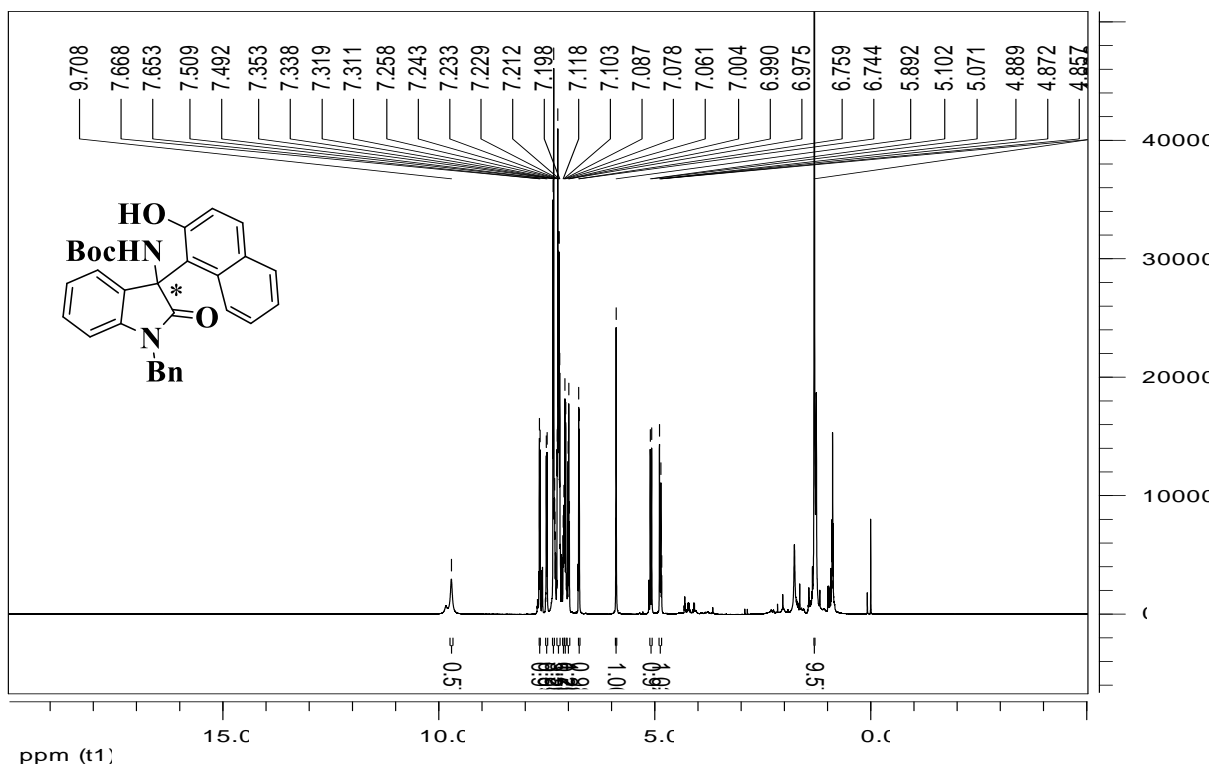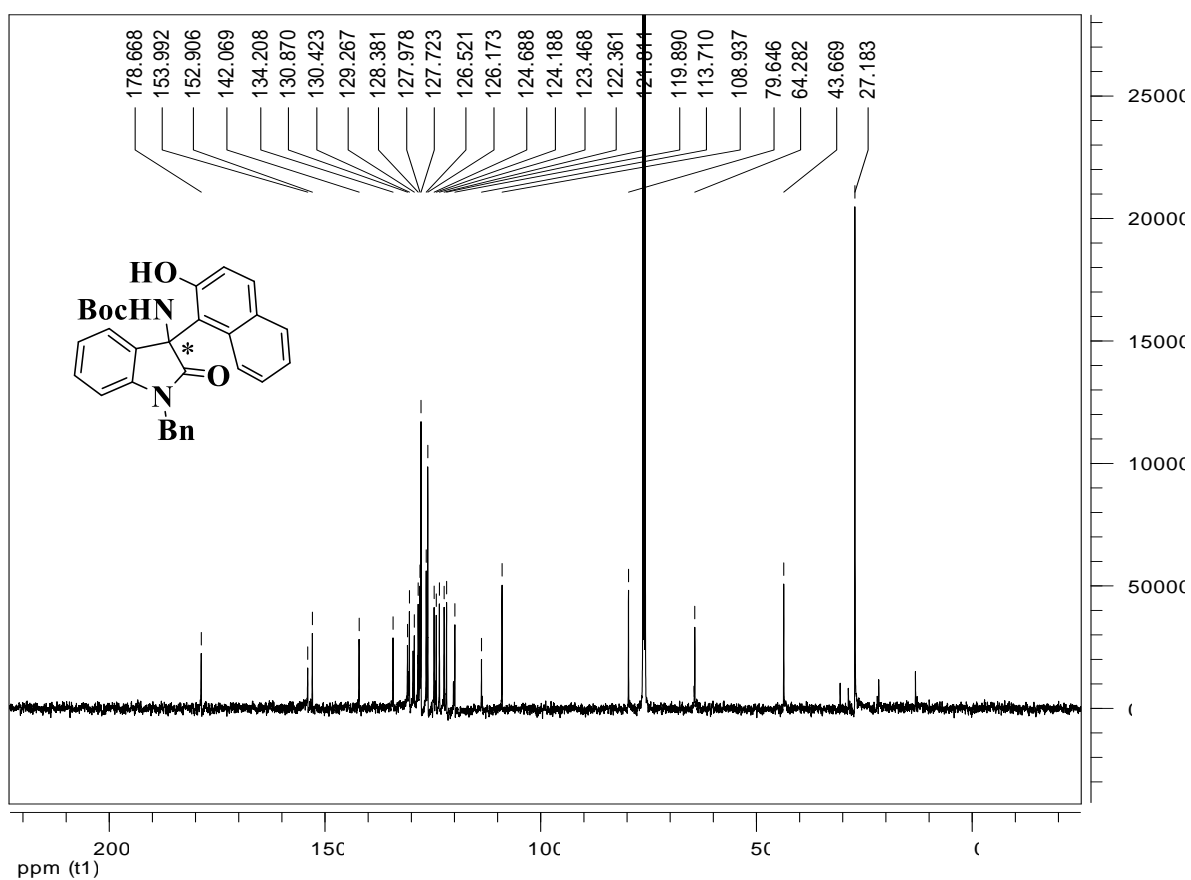

# HPLC chromatogram of racemic and chiral compounds

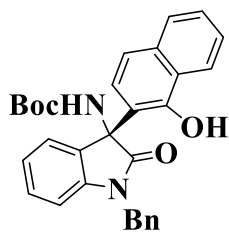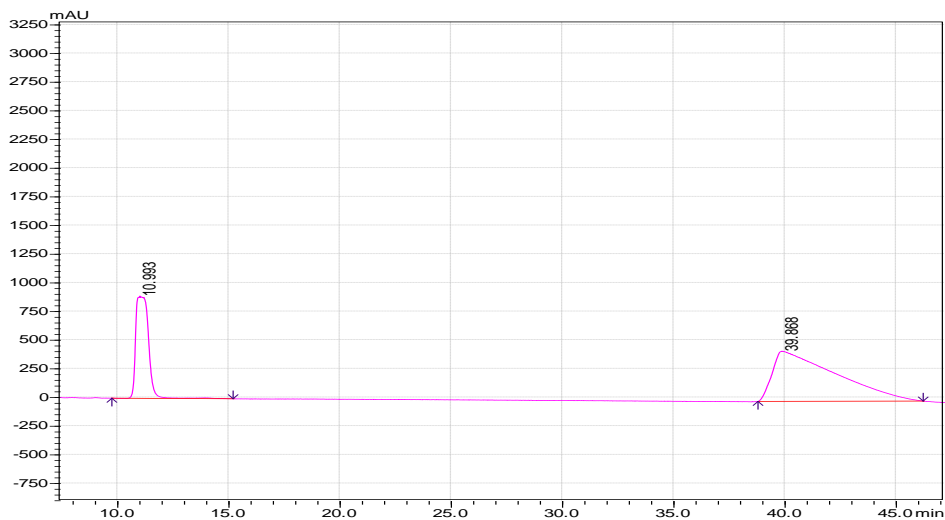

| Peak# | Ret. Time | Peak Start | Peak End | Area%   |
|-------|-----------|------------|----------|---------|
| 1     | 10.993    | 9.739      | 15.189   | 49.8962 |
| 2     | 39.868    | 38.784     | 46.208   | 50.1038 |

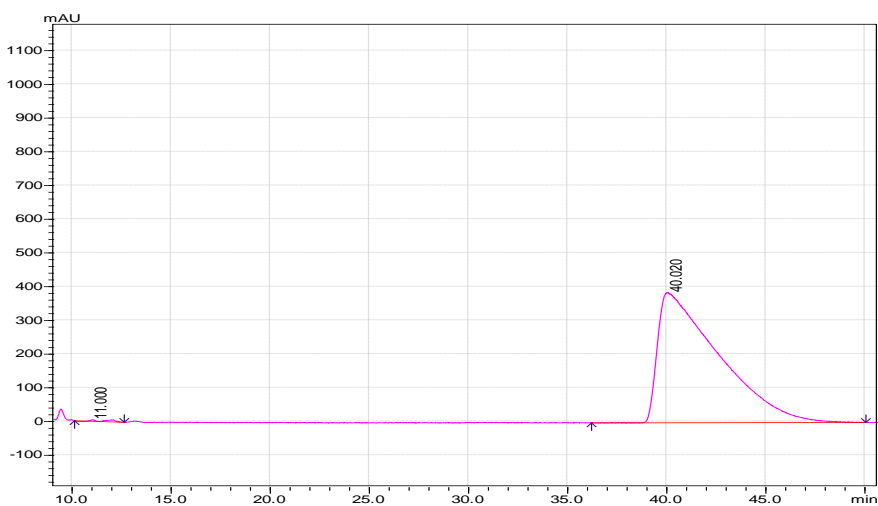

| Peak# | Ret. Time | Peak Start | Peak End | Area%   |
|-------|-----------|------------|----------|---------|
| 1     | 11.000    | 10.123     | 12.629   | 0.2725  |
| 2     | 40.020    | 36.203     | 50.048   | 99.7275 |

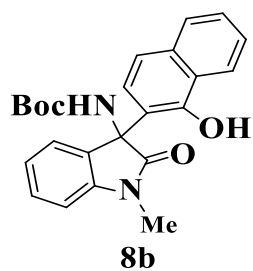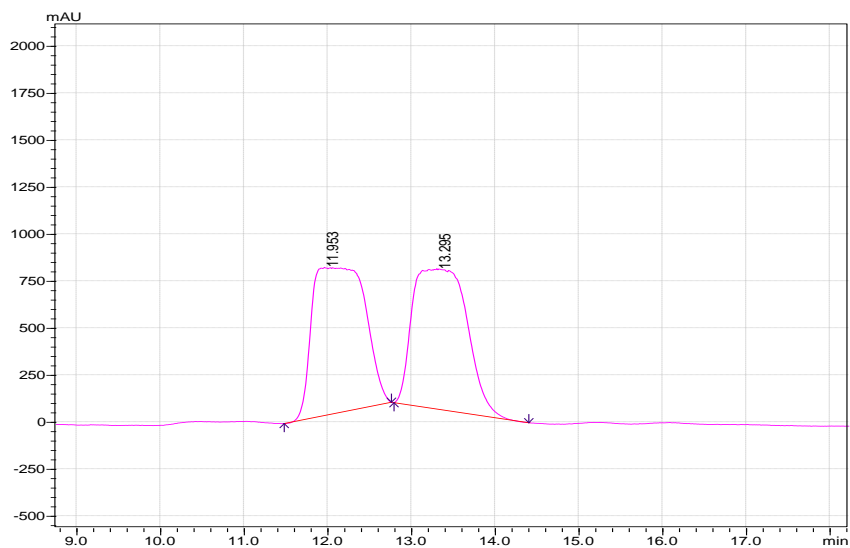

| Peak# | Ret. Time | Peak Start | Peak End | Area%   |
|-------|-----------|------------|----------|---------|
| 1     | 11.953    | 11.521     | 12.655   | 49.8962 |
| 2     | 13.296    | 12.823     | 14.457   | 50.1038 |

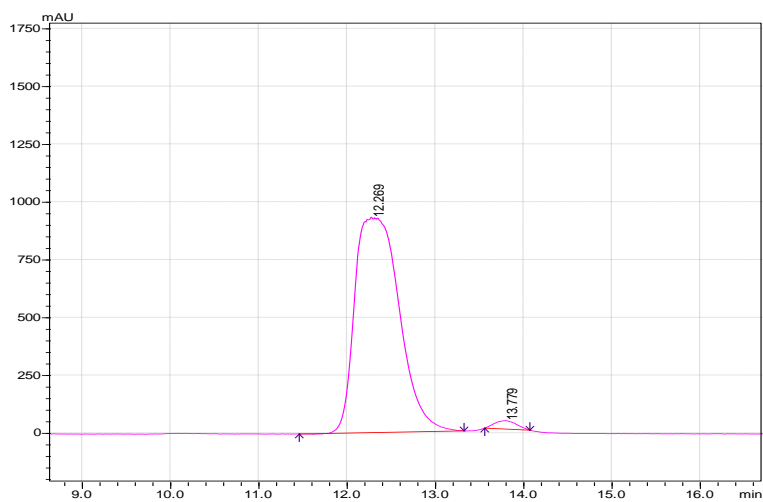

| Peak# | Ret. Time | Peak Start | Peak End | Area%   |
|-------|-----------|------------|----------|---------|
| 1     | 12.269    | 11.521     | 12.655   | 97.2345 |
| 2     | 13.779    | 12.823     | 14.457   | 2.7655  |

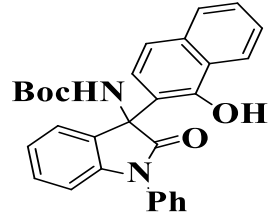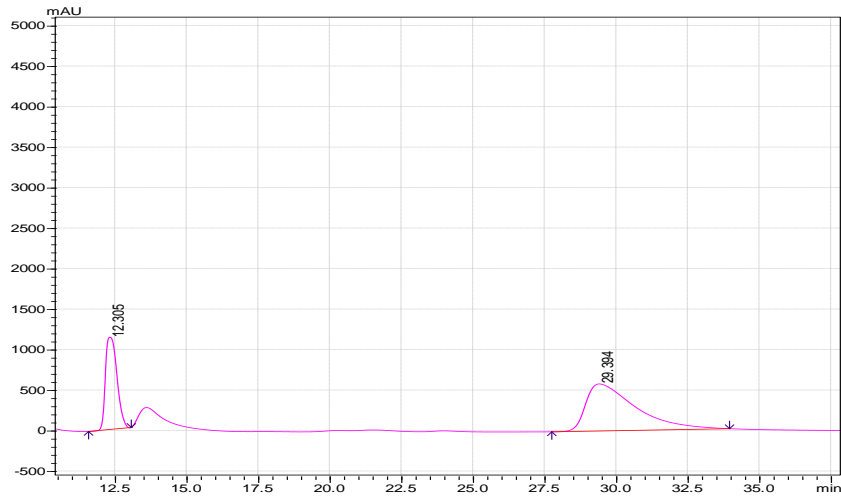

| Peak# | Ret. Time | Peak Start | Peak End | Area%   |
|-------|-----------|------------|----------|---------|
| 1     | 13.662    | 12.821     | 15.669   | 44.2722 |
| 2     | 36.238    | 34.859     | 39.829   | 55.7278 |

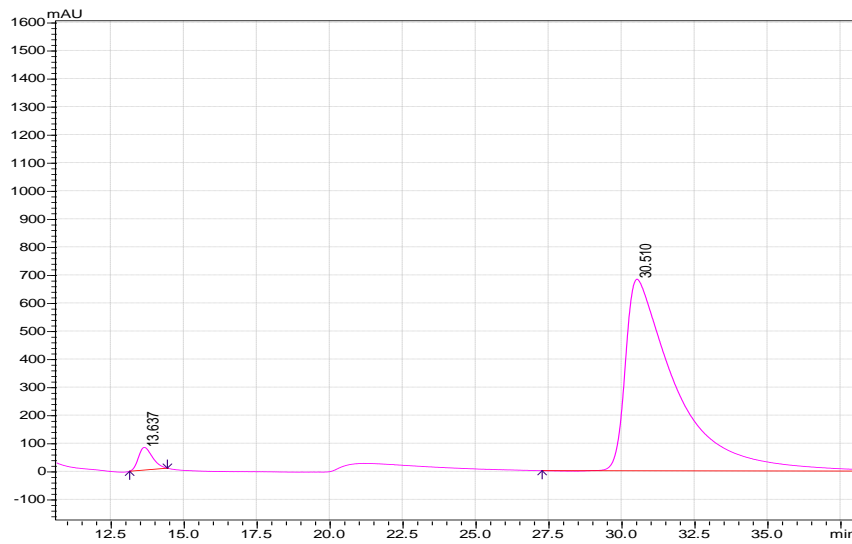

| Peak# | Ret. Time | Peak Start | Peak End | Area%   |
|-------|-----------|------------|----------|---------|
| 1     | 13.637    | 12.821     | 15.669   | 2.5984  |
| 2     | 30.510    | 34.859     | 39.829   | 97.4016 |



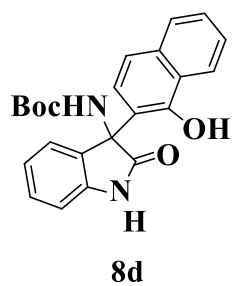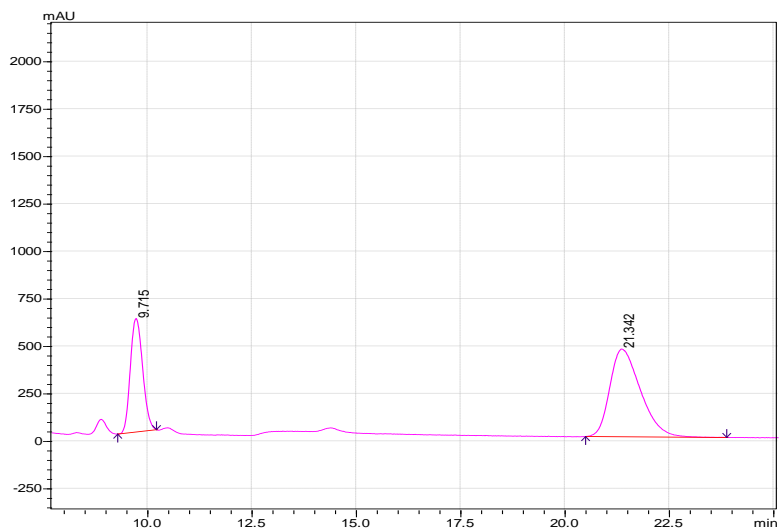

| Peak# | Ret. Time | Peak Start | Peak End | Area%  |
|-------|-----------|------------|----------|--------|
| 1     | 9.715     | 9.280      | 10.208   | 50.330 |
| 2     | 21.342    | 20.491     | 23.872   | 49.670 |

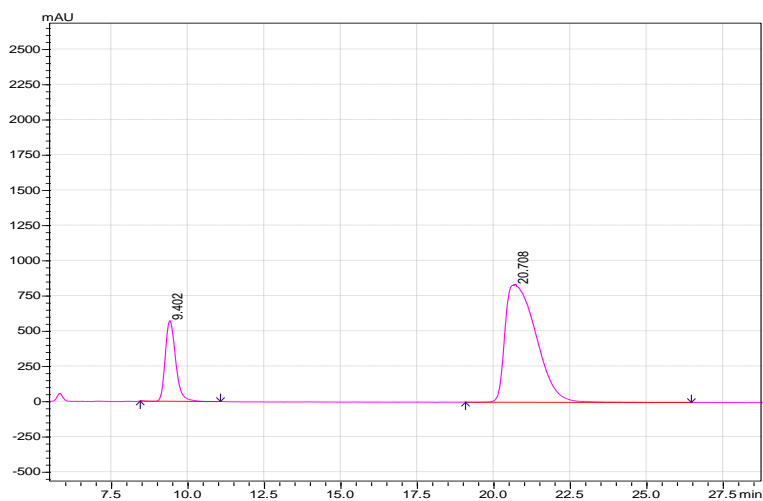

| Peak# | Ret. Time | Peak Start | Peak End | Area%   |
|-------|-----------|------------|----------|---------|
| 1     | 9.402     | 8.437      | 11.061   | 18.5792 |
| 2     | 20.708    | 19.072     | 26.453   | 81.4208 |

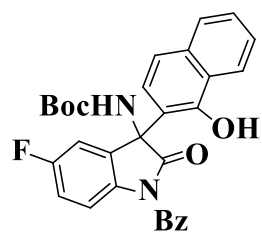

**8e**

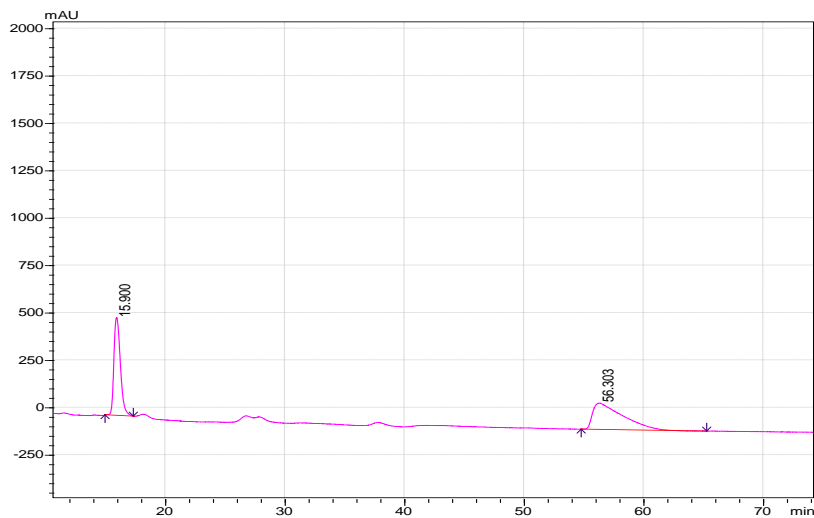

| Peak# | Ret. Time | Peak Start | Peak End | Area%   |
|-------|-----------|------------|----------|---------|
| 1     | 15.900    | 14.933     | 17.301   | 50.0005 |
| 2     | 56.303    | 54.752     | 65.248   | 49.9995 |

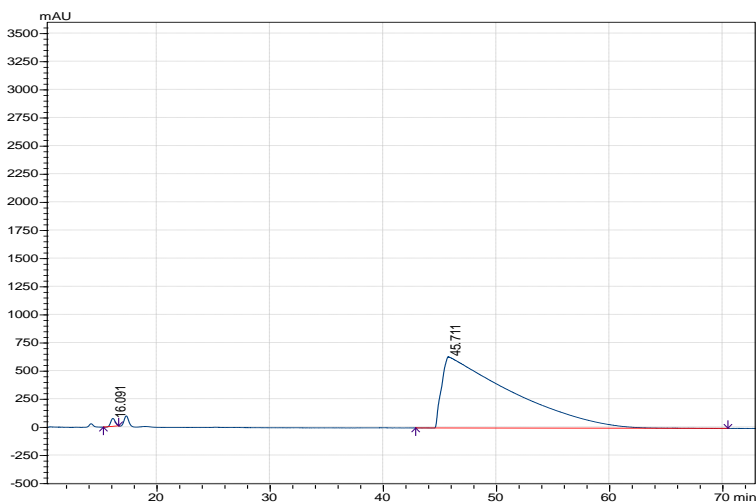

| Peak# | Ret. Time | Peak Start | Peak End | Area%   |
|-------|-----------|------------|----------|---------|
| 1     | 16.091    | 15.264     | 16.608   | 0.6996  |
| 2     | 45.711    | 42.859     | 70.453   | 99.3004 |

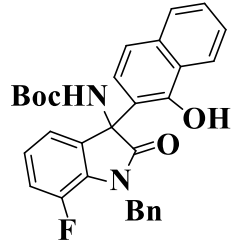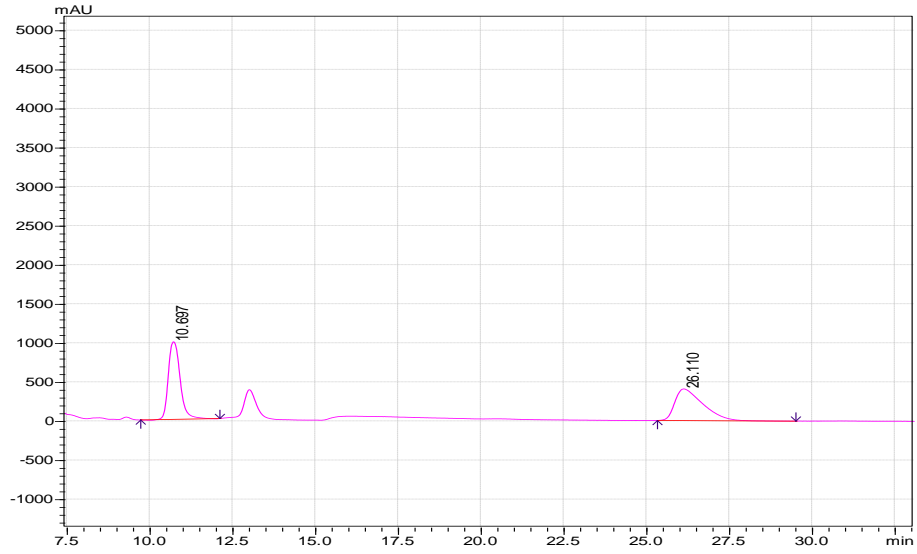

| Peak# | Ret. Time | Peak Start | Peak End | Area%   |
|-------|-----------|------------|----------|---------|
| 1     | 10.687    | 8.853      | 11.451   | 50.0005 |
| 2     | 26.110    | 19.787     | 29.845   | 49.9995 |

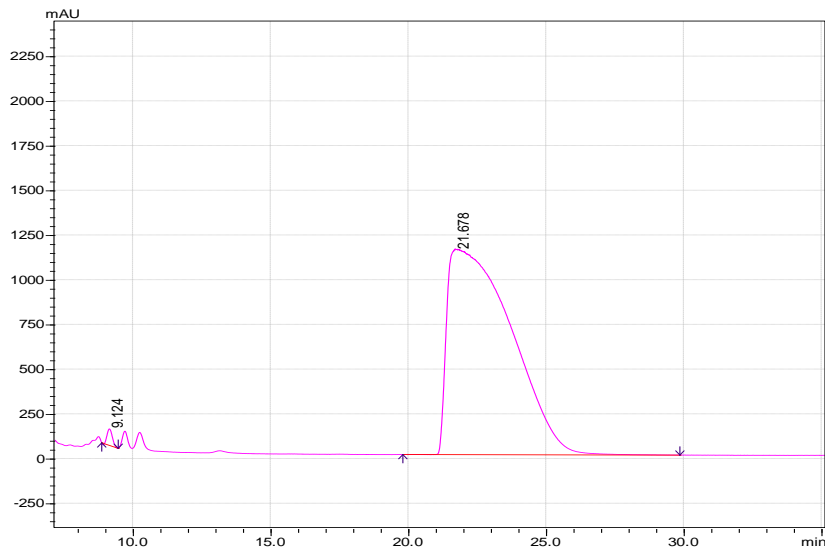

| Peak# | Ret. Time | Peak Start | Peak End | Area%   |
|-------|-----------|------------|----------|---------|
| 1     | 9.124     | 8.853      | 9.451    | 0.6238  |
| 2     | 21.678    | 19.787     | 29.845   | 99.3762 |

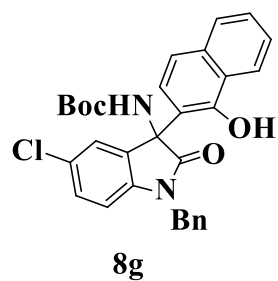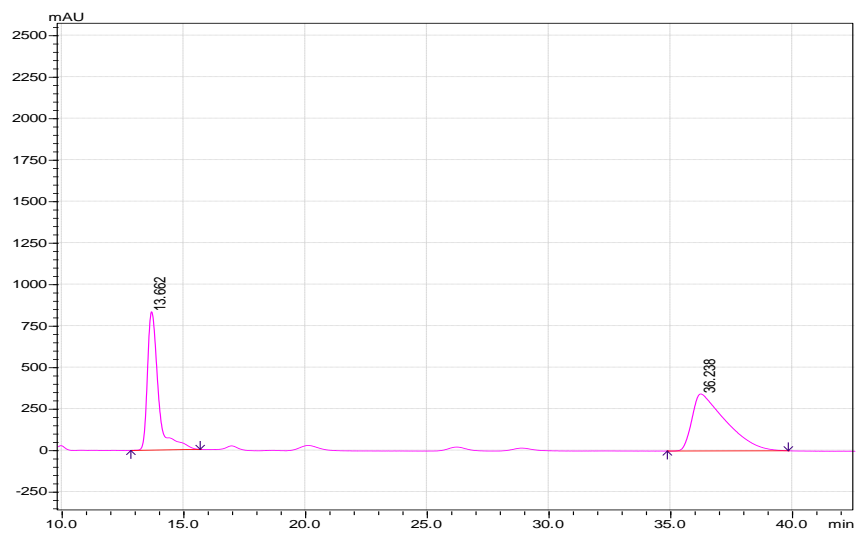

| Peak# | Ret. Time | Peak Start | Peak End | Area%   |
|-------|-----------|------------|----------|---------|
| 1     | 13.662    | 12.821     | 15.669   | 44.2722 |
| 2     | 36.238    | 34.859     | 39.829   | 55.7278 |

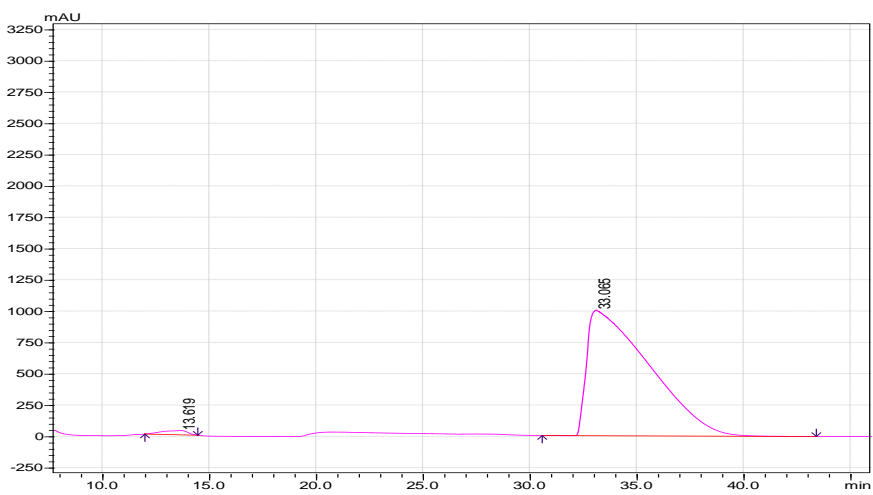

| Peak# | Ret. Time | Peak Start | Peak End | Area%   |
|-------|-----------|------------|----------|---------|
| 1     | 13.619    | 11.968     | 14.443   | 1.3680  |
| 2     | 33.065    | 30.560     | 43.381   | 98.6320 |

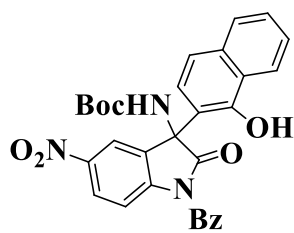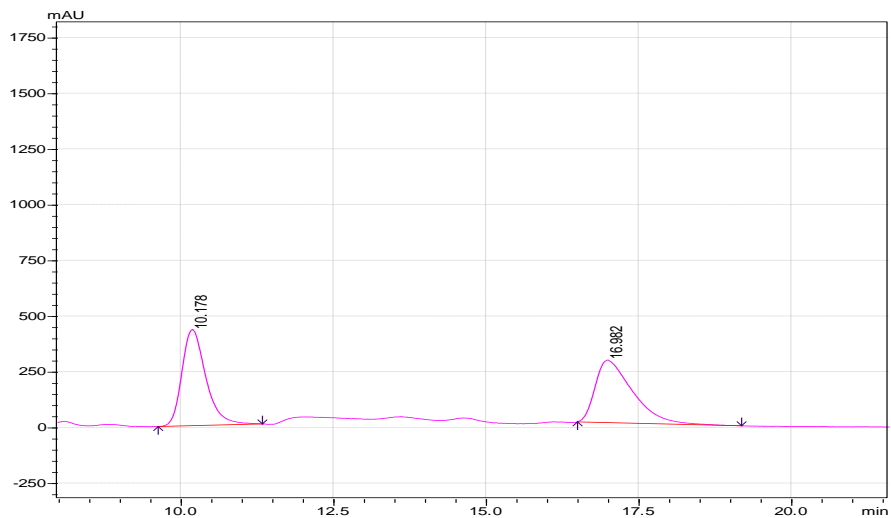

| Peak# | Ret. Time | Peak Start | Peak End | Area%   |
|-------|-----------|------------|----------|---------|
| 1     | 10.178    | 9.621      | 11.328   | 49.7249 |
| 2     | 16.982    | 16.491     | 19.179   | 50.2751 |

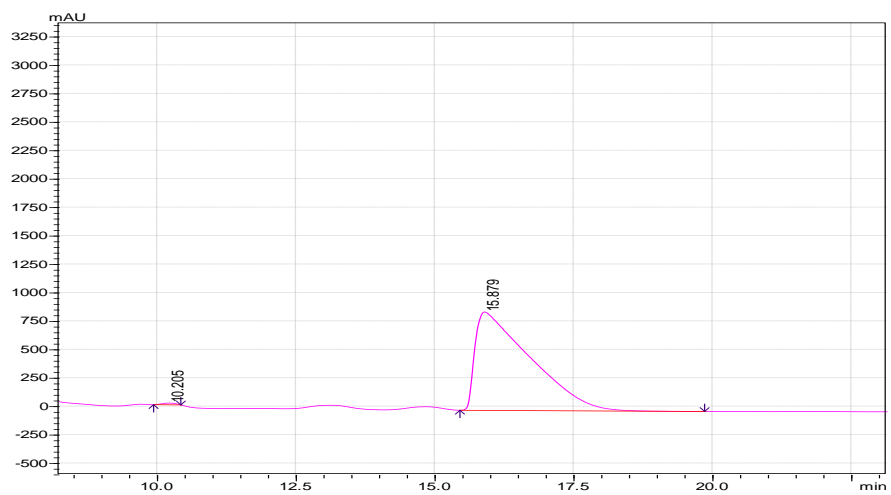

| Peak# | Ret. Time | Peak Start | Peak End | Area%   |
|-------|-----------|------------|----------|---------|
| 1     | 10.205    | 9.931      | 10.421   | 0.4318  |
| 2     | 15.879    | 15.445     | 19.851   | 99.5682 |

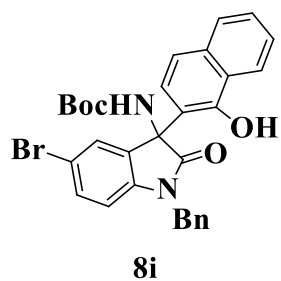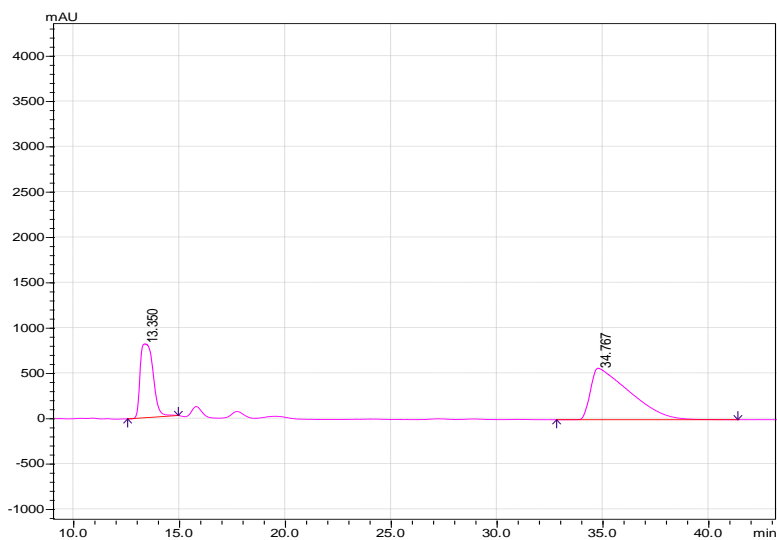

| Peak# | Ret. Time | Peak Start | Peak End | Area%   |
|-------|-----------|------------|----------|---------|
| 1     | 13.350    | 12.544     | 14.944   | 32.4339 |
| 2     | 34.767    | 32.811     | 41.376   | 67.5661 |

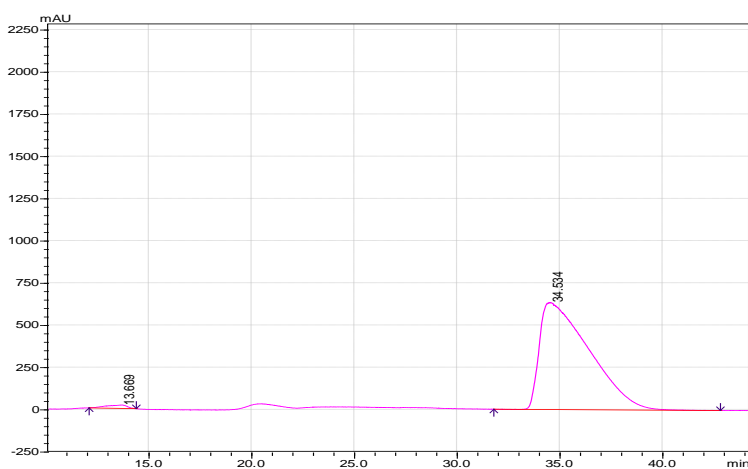

| Peak# | Ret. Time | Peak Start | Peak End | Area%   |
|-------|-----------|------------|----------|---------|
| 1     | 13.669    | 12.085     | 14.379   | 1.2917  |
| 2     | 34.534    | 31.776     | 42.805   | 98.7083 |

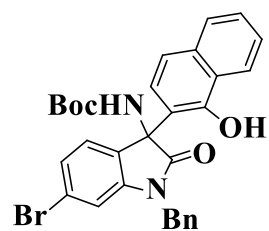

8j

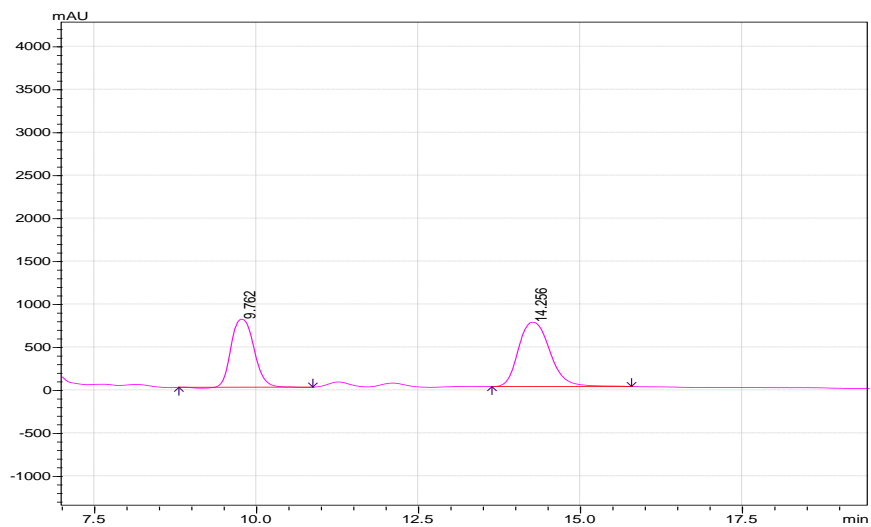

| Peak# | Ret. Time | Peak Start | Peak End | Area%   |
|-------|-----------|------------|----------|---------|
| 1     | 9.762     | 8.800      | 10.869   | 43.1674 |
| 2     | 14.256    | 13.632     | 15.787   | 56.8326 |

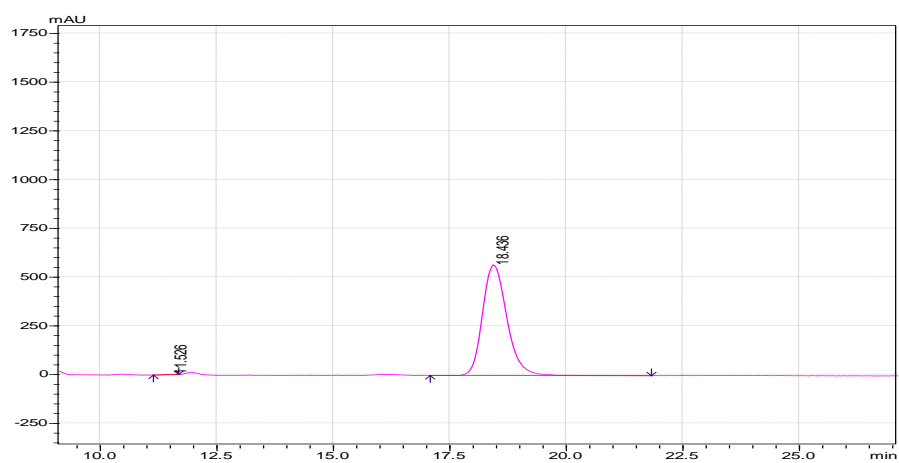

| Peak# | Ret. Time | Peak Start | Peak End | Area%   |
|-------|-----------|------------|----------|---------|
| 1     | 11.526    | 11.136     | 11.680   | 0.1535  |
| 2     | 18.436    | 17.077     | 21.824   | 99.8465 |

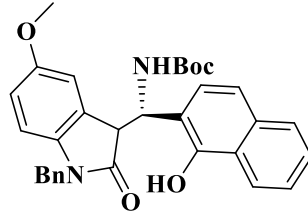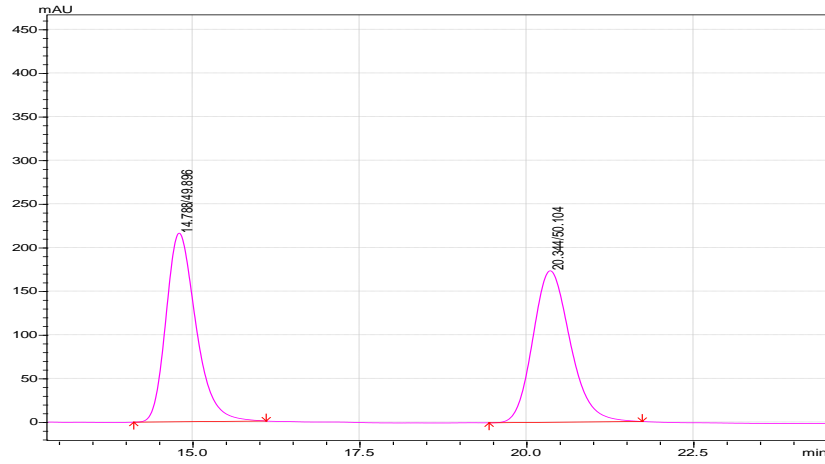

| Peak | Ret. Time | Peak Start | Peak End | Area%   |
|------|-----------|------------|----------|---------|
| 1    | 14.788    | 14.112     | 16.096   | 49.8962 |
| 2    | 20.344    | 19.435     | 21.728   | 50.1038 |

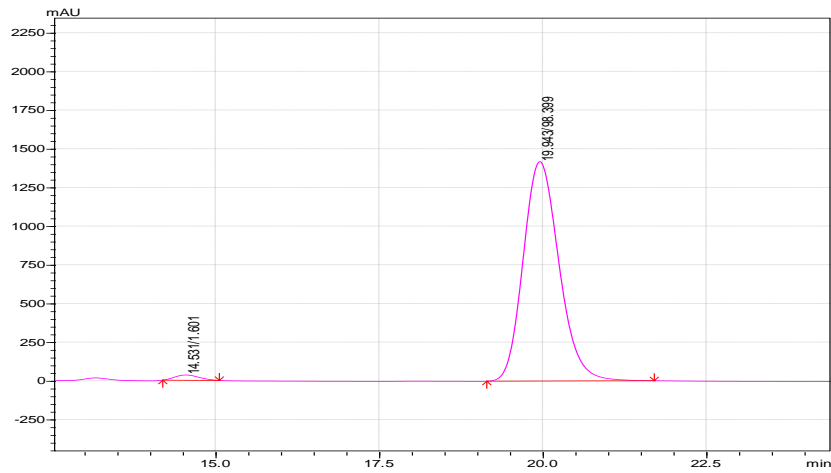

| Peak# | Ret. Time | Peak Start | Peak End | Area%   |
|-------|-----------|------------|----------|---------|
| 1     | 14.531    | 14.187     | 15.051   | 1.6013  |
| 2     | 19.943    | 19.136     | 21.696   | 98.3987 |



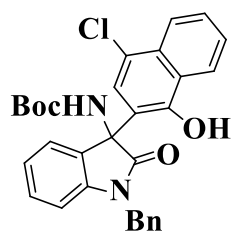

**8m**

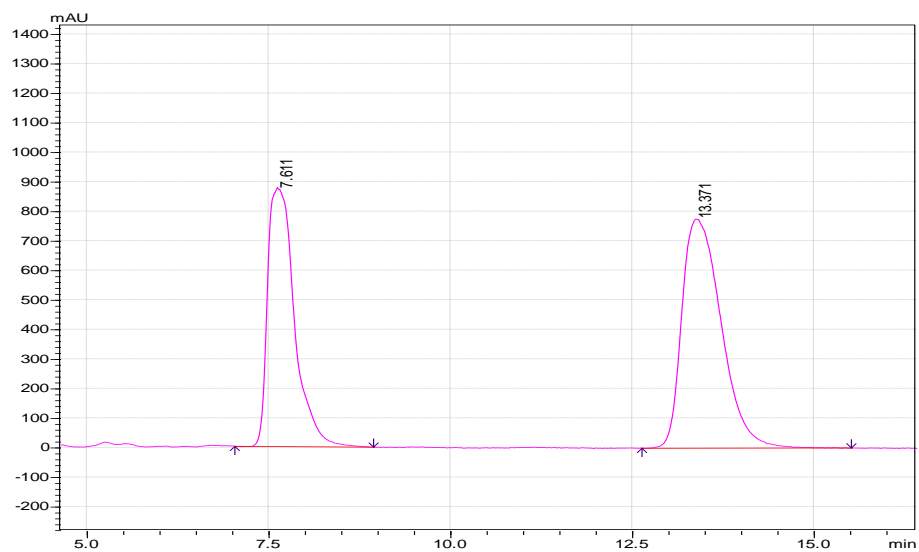

| Peak# | Ret. Time | Peak Start | Peak End | Area%   |
|-------|-----------|------------|----------|---------|
| 1     | 7.611     | 7.029      | 8.939    | 43.5749 |
| 2     | 13.371    | 12.629     | 15.509   | 56.4251 |

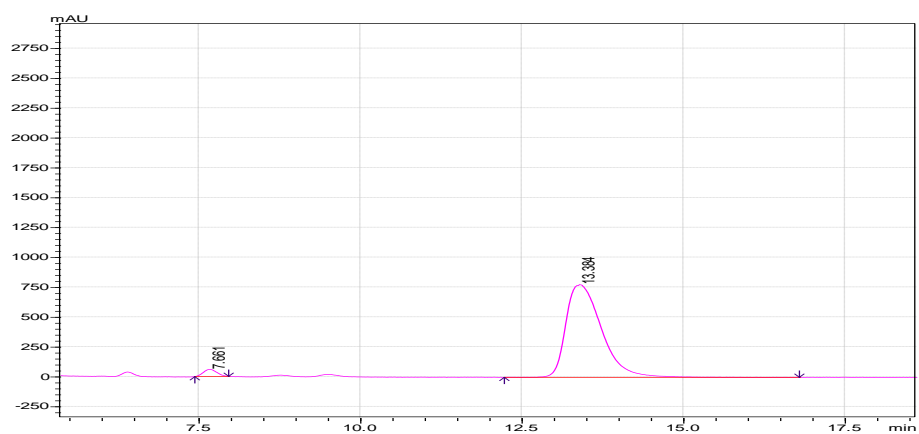

| Peak# | Ret. Time | Peak Start | Peak End | Area%   |
|-------|-----------|------------|----------|---------|
| 1     | 7.661     | 7.435      | 7.957    | 2.8295  |
| 2     | 13.384    | 12.224     | 16.789   | 97.1705 |

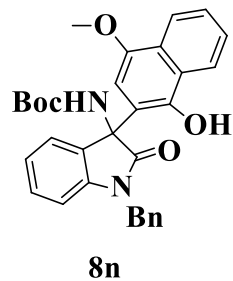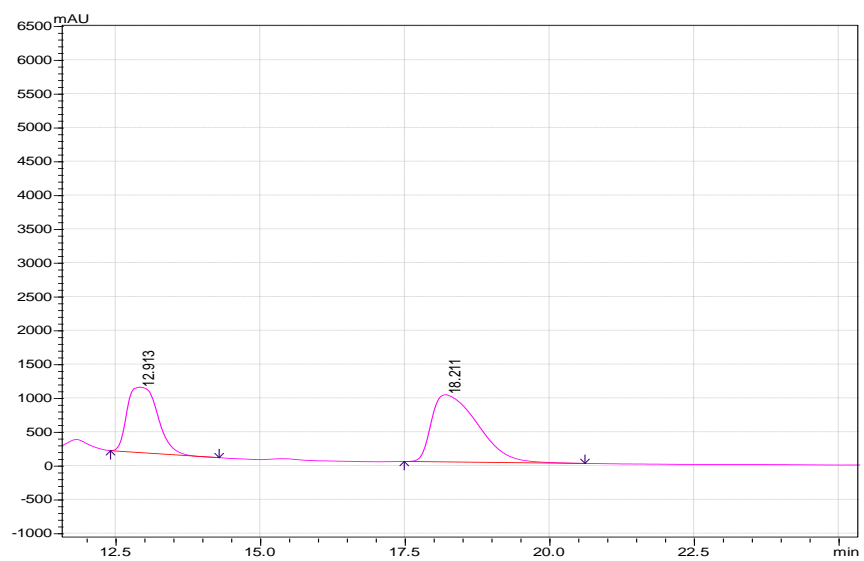

| Peak# | Ret. Time | Peak Start | Peak End | Area%   |
|-------|-----------|------------|----------|---------|
| 1     | 12.913    | 12.405     | 14.283   | 39.1803 |
| 2     | 18.211    | 17.483     | 20.608   | 60.8197 |

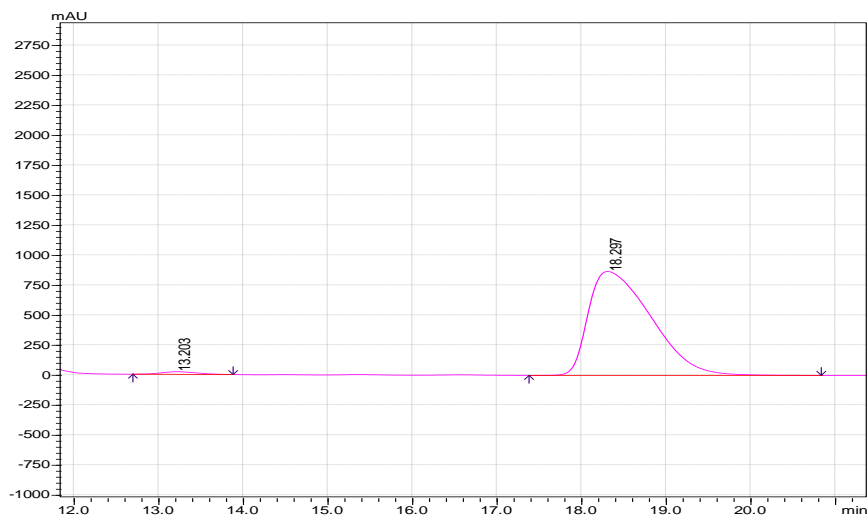

| Peak# | Ret. Time | Peak Start | Peak End | Area%   |
|-------|-----------|------------|----------|---------|
| 1     | 13.203    | 12.693     | 13.877   | 1.3931  |
| 2     | 18.297    | 17.376     | 20.832   | 98.6069 |

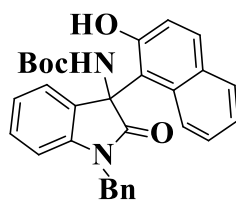

80

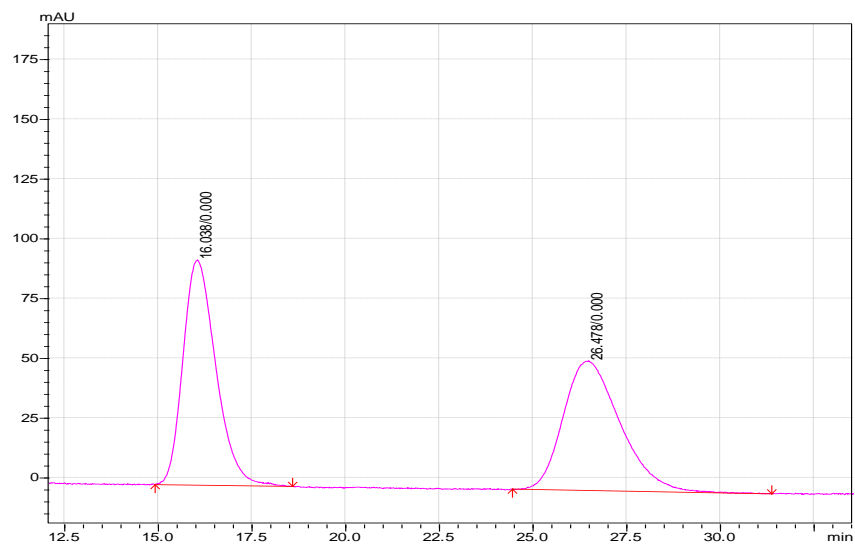

| Peak# | Ret. Time | Peak Start | Peak End | Area%   |
|-------|-----------|------------|----------|---------|
| 1     | 16.038    | 14.912     | 18.581   | 50.1661 |
| 2     | 26.478    | 24.448     | 31.371   | 49.8339 |

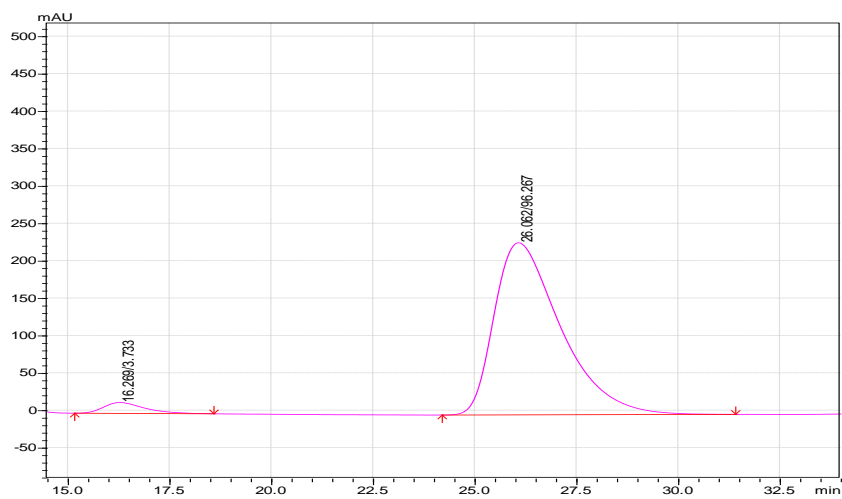

| Peak# | Ret. Time | Peak Start | Peak End | Area %  |
|-------|-----------|------------|----------|---------|
| 1     | 16.269    | 15.157     | 18.581   | 3.7328  |
| 2     | 26.062    | 24.192     | 31.403   | 96.2672 |

Computational Study:

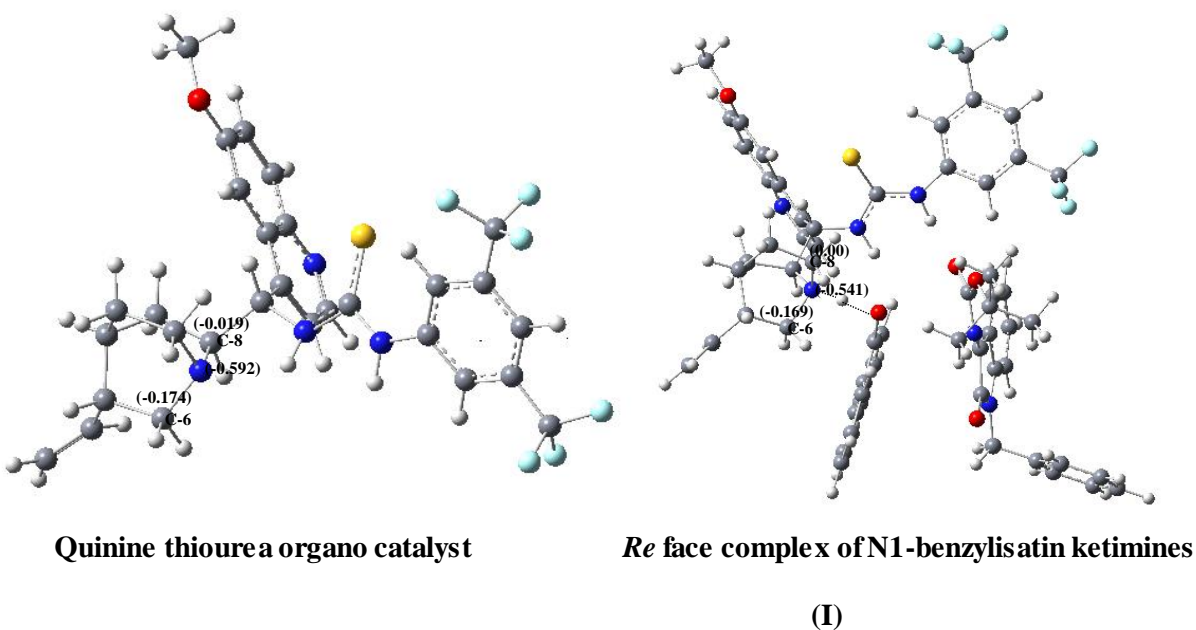

**Figure S1:** Calculated NBO charges for Quinine thiourea organo catalyst and the *Re* face complex of N1-benzylisatin ketimines with **Cat** and **Nu**.

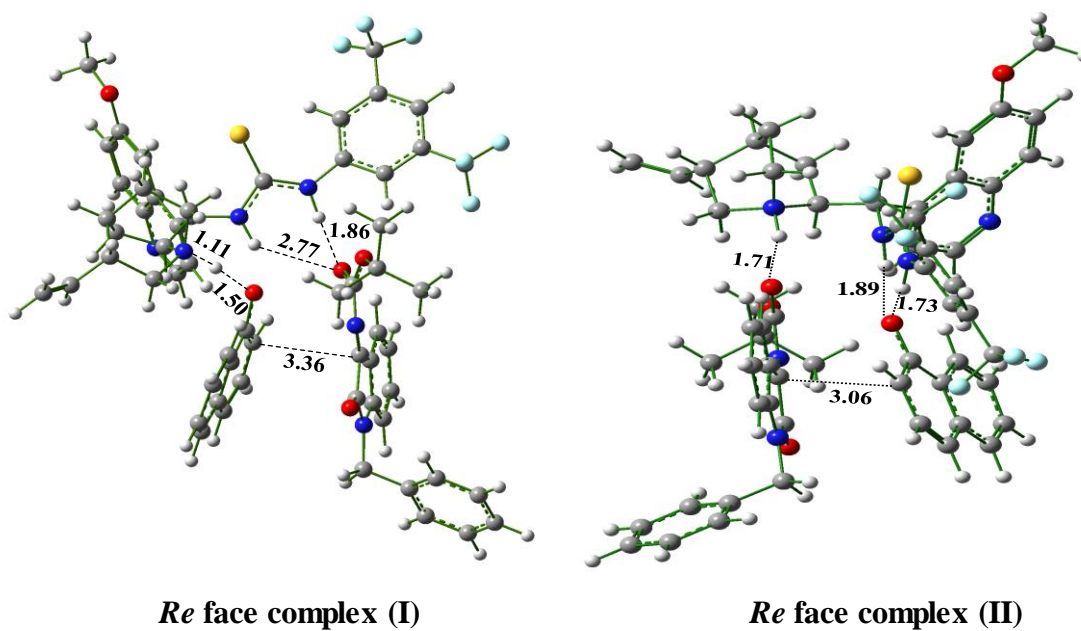

M06-2X /6-311+G(d,p)//B3LYP/6-31G(d)

$\Delta E$ (kcal/mol)

[0.0]

[2.6]

**Figure S2:** *Re* face Complex structures of 1-naphthol and *N*-benzylisatinas with chiral quinine thiourea organocatalyst of both the former (I) and later case (II) calculated with B3LYP/6-31G(d) level of theory. Single point energy calculated at M06-2X /6-311+G(d,p)//B3LYP/6-31G(d) level of theory. The distances are given in Å.

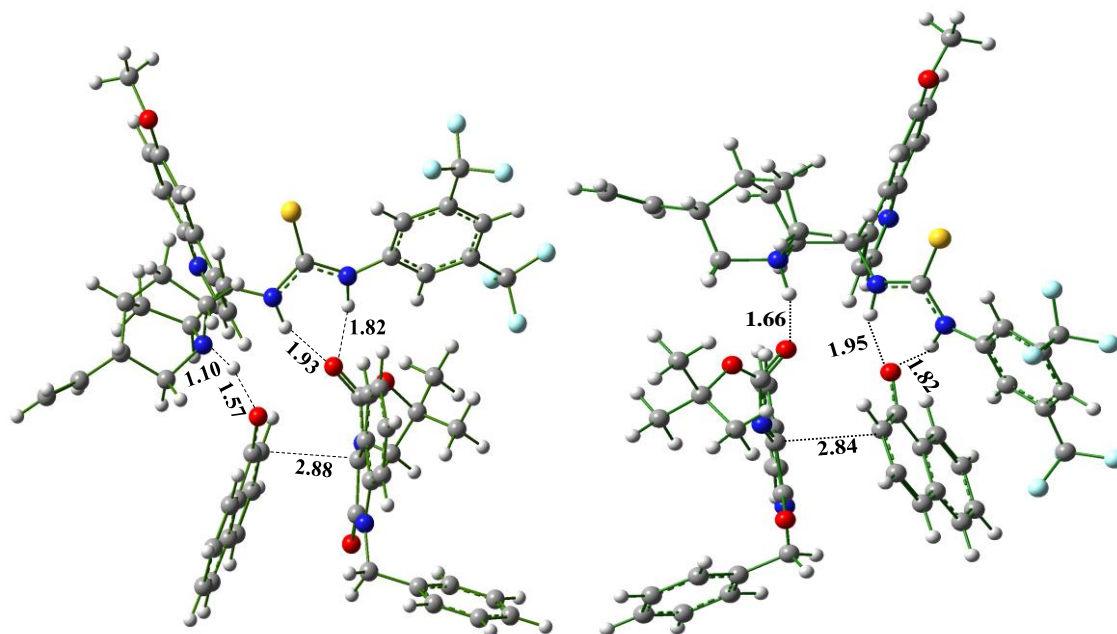

***Si* face complex (I)**

***Si* face complex (II)**

M06-2X /6-311+G(d,p)//B3LYP/6-31G(d)

$\Delta E(\text{kcal/mol})$

[0.0]

[1.6]

**Figure S3:** *Si* face Complex structures of 1-naphthol and N1-benzyl isatin with chiral quinine thiourea organocatalyst of both the former (I) and later case (II) calculated with B3LYP/6-31G(d) level of theory. Single point energy calculated at M06-2X /6-311+G(d,p)//B3LYP/6-31G(d) level of theory. The distances are given in Å.

### Co-ordinates of the catalyst, complexes and transition states

#### Quinine thiourea organo catalyst

B3LYP/6-31G(d) level of theory:

Charge: 0

Spin Multiplicity: 1

Electronic Energy (au): -2413.3992323

|   |             |             |             |   |             |             |             |
|---|-------------|-------------|-------------|---|-------------|-------------|-------------|
| C | -2.69527000 | -1.66448900 | 0.05818400  | H | -0.36172400 | -1.80400800 | 0.00036300  |
| C | -4.48690000 | -2.41170300 | 1.65047700  | C | 0.63083100  | -0.01757000 | -0.12023900 |
| C | -4.15261000 | -1.39961600 | 0.53429500  | S | 0.52915600  | 1.62022600  | 0.19454400  |
| H | -2.71936800 | -2.14972200 | -0.92507000 | N | 1.80390800  | -0.74186800 | -0.27119300 |
| H | -4.26436800 | -0.38399800 | 0.93003200  | H | 1.68492300  | -1.62526900 | -0.75324700 |
| H | -4.85287100 | -1.48194600 | -0.30290300 | C | 3.14865500  | -0.36601800 | -0.10890100 |
| C | -2.09055900 | -2.21597600 | 2.36419300  | C | 4.10304200  | -1.06632200 | -0.85937600 |
| H | -1.52374900 | -2.94562900 | 2.95226300  | C | 3.57920400  | 0.61136400  | 0.80018000  |
| H | -1.56922200 | -1.25919600 | 2.46467300  | C | 5.46152900  | -0.79513400 | -0.70889000 |
| C | -3.56751300 | -2.11575400 | 2.85152700  | H | 3.78513200  | -1.82038700 | -1.57392900 |
| H | -3.76228700 | -2.82897000 | 3.66157400  | C | 4.94114800  | 0.88030300  | 0.92574100  |
| H | -3.78049800 | -1.11597100 | 3.24806100  | H | 2.85936100  | 1.15396600  | 1.39491200  |
| H | -5.53786000 | -2.31316100 | 1.94195000  | C | 5.89488200  | 0.18585100  | 0.18061800  |
| C | -4.21399300 | -3.87151000 | 1.18573300  | H | 6.95007200  | 0.40272700  | 0.29255500  |
| C | -2.68993200 | -3.94405700 | 0.80199500  | C | 5.39041600  | 1.98060500  | 1.85433200  |
| H | -2.16586200 | -4.66859400 | 1.43473300  | C | 6.46289600  | -1.61499600 | -1.47905400 |
| H | -2.56791300 | -4.27449200 | -0.23580600 | F | 6.61154900  | 1.72325300  | 2.37552100  |
| N | -2.01698400 | -2.64072000 | 0.94857100  | F | 5.47932500  | 3.16521800  | 1.21060000  |
| C | -1.83620700 | -0.37733700 | -0.11372900 | F | 4.53643000  | 2.15083100  | 2.88536600  |
| C | -2.35053000 | 0.43745700  | -1.29883800 | F | 6.75718300  | -2.76966200 | -0.83647400 |
| C | -4.29563700 | 3.32419700  | 0.16996100  | F | 5.99320800  | -1.95842200 | -2.70007400 |
| H | -3.11186600 | 1.80259400  | 1.03275100  | F | 7.62504000  | -0.95459400 | -1.65881500 |
| C | -4.48438400 | 3.37032100  | -2.23691000 | C | -2.08330600 | 0.00797400  | -2.58127400 |
| H | -2.39727500 | 0.34340700  | -4.70135500 | C | -3.49662100 | 2.19598900  | 0.09984600  |
| C | -4.80225700 | 3.91710100  | -1.01488600 | C | -3.66514200 | 2.21905500  | -2.34484500 |
| H | -4.84928400 | 3.80890600  | -3.16022200 | C | -2.61831900 | 0.69682100  | -3.69446400 |
| H | -5.42880600 | 4.80031400  | -0.96753100 | C | -3.16544900 | 1.60684600  | -1.14353300 |
| N | -3.39162100 | 1.75697400  | -3.59914800 | H | -1.44976800 | -0.85907100 | -2.74449600 |
| N | -0.45696000 | -0.82930400 | -0.29693500 | H | -1.88499400 | 0.23075100  | 0.79459900  |

|   |             |             |            |   |             |             |             |
|---|-------------|-------------|------------|---|-------------|-------------|-------------|
| O | -4.54641900 | 3.80205500  | 1.42415700 | C | -5.10988500 | -4.32706300 | 0.06589100  |
| C | -5.31162000 | 4.98944700  | 1.56267800 | H | -4.99796400 | -3.80609500 | -0.88687600 |
| H | -5.35730600 | 5.18908500  | 2.63481900 | C | -6.00393500 | -5.31314200 | 0.15538300  |
| H | -4.83563600 | 5.83987800  | 1.05755200 | H | -6.15067500 | -5.87006500 | 1.07902400  |
| H | -6.33180400 | 4.86361400  | 1.17648600 | H | -6.62430300 | -5.60259200 | -0.68850200 |
| H | -4.39743100 | -4.52719000 | 2.04686900 |   |             |             |             |

### **Re face complex for N1-benzylisatin ketimine of former case**

B3LYP/6-31G(d) level of theory:

Charge: 0

Spin Multiplicity: 1

Electronic Energy (au): -3983.90120115

Electronic Energy (au): -3983.51569232 at M06-2X/6-311+G(d,p)// B3LYP/6-31G(d) level of theory

|   |            |             |             |   |             |             |             |
|---|------------|-------------|-------------|---|-------------|-------------|-------------|
| C | 1.81891600 | -3.32330600 | -0.60096800 | C | 0.61764000  | -4.09469400 | -2.60122400 |
| C | 3.02877300 | -4.66112200 | -2.37597800 | H | -0.01334700 | -3.72915400 | -3.41227400 |
| C | 2.76643600 | -4.52968300 | -0.86066500 | H | -0.04331800 | -4.56005700 | -1.86658200 |
| H | 0.94476200 | -3.62913800 | -0.02329200 | N | 1.23603100  | -2.89297000 | -1.93242600 |
| H | 3.71097800 | -4.38373800 | -0.32833300 | C | 2.56213000  | -2.18599800 | 0.15640100  |
| H | 2.32932400 | -5.45222300 | -0.46601200 | C | 2.65894200  | -2.58799100 | 1.63808000  |
| C | 2.28002600 | -2.30183000 | -2.83826200 | C | 6.33921500  | -3.02847500 | 2.37841500  |
| H | 1.78987000 | -2.12985800 | -3.80038100 | H | 5.28861400  | -2.36737600 | 0.66679800  |
|   |            |             |             | C | 5.05449000  | -3.54527100 | 4.35668700  |
| H | 2.59003800 | -1.33976900 | -2.43203100 | H | 0.64200400  | -3.21327400 | 4.30791000  |
| C | 3.46429100 | -3.29441300 | -2.94365900 | C | 6.27677400  | -3.44247500 | 3.73385400  |
| H | 3.77091300 | -3.39900000 | -3.98991300 | H | 4.97652900  | -3.85120900 | 5.39511700  |
| H | 4.32767900 | -2.90414300 | -2.39456300 | H | 7.18199800  | -3.67014500 | 4.28490000  |
| H | 3.80321500 | -5.41256700 | -2.55744500 | N | 2.68473500  | -3.38189600 | 4.37496900  |
| C | 1.71757100 | -5.06778300 | -3.10188000 | N | 1.98795700  | -0.85344100 | -0.01863200 |

|   |             |             |             |   |             |             |             |
|---|-------------|-------------|-------------|---|-------------|-------------|-------------|
| H | 0.96330600  | -0.76976400 | -0.01267000 | O | 7.50524300  | -2.88856000 | 1.68432600  |
| C | 2.77314900  | 0.25293000  | -0.22887300 | C | 8.73489300  | -3.08456200 | 2.36546600  |
| S | 4.39637700  | 0.14018300  | -0.71721600 | H | 9.51590700  | -2.88148500 | 1.63061700  |
| N | 2.10589900  | 1.43080000  | -0.05487800 | H | 8.84512600  | -2.39179900 | 3.20975400  |
| H | 1.09585600  | 1.36594500  | 0.12900400  | H | 8.84064400  | -4.11609400 | 2.72713000  |
| C | 2.55945000  | 2.75996400  | -0.20969900 | C | -4.30687200 | -4.60851500 | -2.56855300 |
| C | 1.59867600  | 3.71281700  | -0.57557700 | C | -4.36981200 | -4.57814900 | -1.19285200 |
| C | 3.86923600  | 3.18681400  | 0.05794300  | C | -3.52568100 | -3.72401000 | -0.43091000 |
| C | 1.94371200  | 5.05726600  | -0.69737300 | C | -2.56300300 | -2.91893500 | -1.12717600 |
| H | 0.58376600  | 3.39469900  | -0.77472000 | C | -2.55174000 | -2.94536800 | -2.54398300 |
|   |             |             |             | C | -3.40029500 | -3.76813000 | -3.25571900 |
| C | 4.19864200  | 4.53546500  | -0.08147200 | H | -4.35810100 | -4.25090900 | 1.50446000  |
| H | 4.61942000  | 2.47688100  | 0.37235400  | H | -4.96885400 | -5.26337200 | -3.12982200 |
| C | 3.24864200  | 5.48428900  | -0.46090100 | H | -5.08579800 | -5.20427900 | -0.66417500 |
| H | 3.51587200  | 6.52998700  | -0.55236700 | C | -3.62906800 | -3.63514700 | 0.98372300  |
| C | 5.62387800  | 4.97251300  | 0.13774300  | C | -1.64542600 | -2.07219700 | -0.38332000 |
| C | 0.89468000  | 6.03152800  | -1.15891500 | H | -1.87343300 | -2.27134800 | -3.05773100 |
| F | 6.27674300  | 4.16716400  | 1.00187400  | H | -3.38718200 | -3.76120900 | -4.34281900 |
| F | 6.32881100  | 4.96775200  | -1.01761100 | C | -1.85254000 | -1.97219000 | 1.00130300  |
| F | 5.69011500  | 6.23249800  | 0.62787300  | C | -2.82357900 | -2.75016600 | 1.66782600  |
| F | 1.19266500  | 7.30331500  | -0.82151300 | H | -1.23911500 | -1.27013300 | 1.55830300  |
| F | 0.75018500  | 6.00846600  | -2.51069200 | H | -2.92282300 | -2.65068400 | 2.74703700  |
| F | -0.32410700 | 5.74700000  | -0.64327300 | O | -0.67343300 | -1.41459100 | -0.99018800 |
| C | 1.50399100  | -2.72471900 | 2.37983500  | C | -4.87370400 | 0.67719600  | 2.18602700  |
| C | 5.17951900  | -2.73674600 | 1.67962600  | C | -3.60423800 | 1.11648900  | 1.72511300  |
| C | 3.84751200  | -3.25579900 | 3.67352300  | C | -2.70600100 | 1.70273600  | 2.62334300  |
| C | 1.56528000  | -3.11336000 | 3.73824300  | C | -3.08109300 | 1.85127600  | 3.95957000  |
| C | 3.90867600  | -2.84751200 | 2.29394700  | C | -4.33675100 | 1.41521000  | 4.39353300  |
| H | 0.52961100  | -2.54169000 | 1.93680900  | C | -5.25163400 | 0.82275800  | 3.51449400  |
| H | 3.56514600  | -2.10700300 | -0.25804000 | C | -4.91955500 | 0.19176500  | -0.04724700 |



|   |              |             |             |   |              |             |             |
|---|--------------|-------------|-------------|---|--------------|-------------|-------------|
| C | -3.56140700  | 0.83359400  | 0.29196200  | H | -9.36219100  | 3.05212300  | -0.76318700 |
| H | -1.73034600  | 2.01586200  | 2.27639200  | H | -10.56606400 | 1.85367800  | 3.18927000  |
| H | -2.39141900  | 2.30369800  | 4.66524800  | H | -10.85433700 | 3.32831600  | 1.20778100  |
| H | -4.61530100  | 1.53679800  | 5.43694500  | C | -2.05501500  | 0.89105000  | -3.59515400 |
| H | -6.22783500  | 0.50430100  | 3.86201100  | H | -2.89639300  | 0.45904900  | -3.05336500 |
| N | -5.61944000  | 0.11411300  | 1.14206500  | H | -2.34199900  | 1.04085500  | -4.64241500 |
| C | -6.96812300  | -0.43857600 | 1.23232300  | H | -1.21971000  | 0.18434300  | -3.56165200 |
| H | -7.06937900  | -1.09537200 | 0.36333300  | C | -0.49952200  | 2.85562600  | -3.84213800 |
| H | -7.02791400  | -1.06117000 | 2.13131400  | H | -0.16718900  | 3.80861900  | -3.42143900 |
| O | -5.31829000  | -0.15046900 | -1.14217000 | H | 0.36003700   | 2.17974000  | -3.89279600 |
| N | -2.77361400  | 1.03402400  | -0.70148100 | H | -0.85703900  | 3.03641400  | -4.86118400 |
| C | -1.46835400  | 1.48305500  | -0.59289800 | C | -2.78115000  | 3.22226100  | -2.84123900 |
| O | -0.74438900  | 1.37384100  | 0.39663700  | H | -2.43555600  | 4.13279500  | -2.33909900 |
| O | -0.95162700  | 2.04262400  | -1.69046700 | H | -3.16487900  | 3.50220600  | -3.82865500 |
| C | -1.62342000  | 2.23579500  | -3.00581100 | H | -3.60051100  | 2.78066400  | -2.26985400 |
| C | -8.06170600  | 0.61533400  | 1.23400100  | H | 1.87127100   | -4.90881500 | -4.17682800 |
| C | -8.23704700  | 1.44419100  | 0.11629900  | C | 1.31454200   | -6.50550300 | -2.90771600 |
| C | -8.91076200  | 0.77140200  | 2.33352500  | H | 1.08649400   | -6.81335100 | -1.88630500 |
| C | -9.23542400  | 2.41633200  | 0.10903800  | C | 1.21833800   | -7.40058200 | -3.89115800 |
| H | -7.59047100  | 1.31710700  | -0.74802300 | H | 1.42390000   | -7.13850500 | -4.92723100 |
| C | -9.91432100  | 1.74351300  | 2.32661700  | H | 0.92849800   | -8.42981700 | -3.69985300 |
| H | -8.79297200  | 0.12481500  | 3.20115800  | H | 0.40708900   | -2.20078100 | -1.67690400 |
| C | -10.07589100 | 2.57014900  | 1.21534300  |   |              |             |             |

**Si face complex for N1-benzylisatin ketimine of former case**

B3LYP/6-31G(d) level of theory:

Charge: 0

Spin Multiplicity: 1

Electronic Energy (au): -3983.89335284

Electronic Energy (au): -3983.50656717 at M06-2X/6-311+G(d,p)// B3LYP/6-31G(d) level of theory

|   |            |             |             |   |             |             |             |
|---|------------|-------------|-------------|---|-------------|-------------|-------------|
| C | 2.52986500 | -2.82744800 | -0.11608600 | H | 7.33805000  | -1.04602900 | 4.29299300  |
| C | 3.70230700 | -4.44701800 | -1.67678900 | H | 8.99540700  | -1.02276300 | 2.45342700  |
| C | 3.67869600 | -3.87163700 | -0.24501100 | N | 4.79511600  | -1.13085100 | 4.08692700  |
| H | 1.88295600 | -3.05338700 | 0.73616400  | N | 2.10519200  | -0.35671800 | -0.17826500 |
| H | 4.63818300 | -3.39977500 | -0.01819500 | H | 1.31310800  | -0.34211800 | 0.46184200  |
| H | 3.54993400 | -4.67359500 | 0.48824500  | C | 2.41498400  | 0.85133400  | -0.76865400 |
| C | 2.31290200 | -2.55227600 | -2.58877900 | S | 3.66329900  | 1.02654900  | -1.88871300 |
| H | 1.63149800 | -2.80413700 | -3.40491800 | N | 1.58078300  | 1.84227100  | -0.33205700 |
| H | 2.42587500 | -1.46762900 | -2.56097600 | H | 0.99198900  | 1.57014900  | 0.46233400  |
| C | 3.67229900 | -3.28879600 | -2.69640000 | C | 1.40666800  | 3.18393600  | -0.70860200 |
| H | 3.80676900 | -3.67500800 | -3.71229700 | C | 0.68465900  | 3.97648300  | 0.19895400  |
| H | 4.49749800 | -2.59279300 | -2.51027000 | C | 1.85134100  | 3.75523100  | -1.90961400 |
| H | 4.60131500 | -5.05453500 | -1.81883100 | C | 0.41594800  | 5.31238100  | -0.08775900 |
| C | 2.43418100 | -5.30965700 | -1.91150100 | H | 0.33993000  | 3.54419100  | 1.13443300  |
| C | 1.23442300 | -4.45053000 | -1.44993500 | C | 1.57706300  | 5.09687200  | -2.17291300 |
| H | 0.38658200 | -4.47791900 | -2.13338600 | H | 2.40519400  | 3.16106300  | -2.62152100 |
| H | 0.86135100 | -4.75277400 | -0.46816700 | C | 0.86046400  | 5.88946900  | -1.27598200 |
| N | 1.62821500 | -2.99352800 | -1.32487600 | H | 0.65255300  | 6.92847800  | -1.49844200 |
| C | 3.10442900 | -1.39320800 | 0.04814500  | C | 2.11797400  | 5.71995100  | -3.43441200 |
| C | 3.74470900 | -1.27302700 | 1.44211600  |   |             |             |             |
| C | 7.48135000 | -1.09485800 | 0.88548200  | C | -0.39817000 | 6.11017300  | 0.89560300  |
| H | 5.83414700 | -1.12495600 | -0.43780800 | F | 1.30688400  | 6.70001400  | -3.89314000 |
|   |            |             |             | F | 3.33195400  | 6.27935200  | -3.22927800 |
| C | 7.02039500 | -1.07962600 | 3.25577100  | F | 2.26086700  | 4.81420400  | -4.42479500 |
| H | 2.84647600 | -1.16058000 | 4.72489700  | F | -0.35589000 | 7.43265100  | 0.64301400  |
| C | 7.93591300 | -1.06575700 | 2.22929400  | F | -1.70413900 | 5.74152700  | 0.87819200  |

|   |             |             |             |   |             |             |             |
|---|-------------|-------------|-------------|---|-------------|-------------|-------------|
| F | 0.03412700  | 5.92602600  | 2.16699600  | H | -0.63814800 | -1.80751100 | 1.27617100  |
| C | 2.93535500  | -1.25527200 | 2.55995400  | H | -1.80067800 | -2.80049700 | 3.22622800  |
| C | 6.12549400  | -1.15201900 | 0.60573900  | O | -0.92084200 | -2.56618200 | -1.21743500 |
| C | 5.62628600  | -1.13425900 | 3.00617200  | C | -4.05670000 | -0.52131300 | -1.03416000 |
| C | 3.50121800  | -1.17601300 | 3.85462800  | C | -2.85783800 | -0.00919500 | -0.47085400 |
| C | 5.16344300  | -1.18631700 | 1.64412400  | C | -1.90477100 | 0.58605200  | -1.30173100 |
| H | 1.85252300  | -1.28912200 | 2.47123800  | C | -2.17506800 | 0.71710000  | -2.66394600 |
| H | 3.86316900  | -1.22827200 | -0.71453400 | C | -3.38220100 | 0.24879400  | -3.19147000 |
| O | 8.31267600  | -1.06902900 | -0.19432100 | C | -4.33790400 | -0.38393600 | -2.38665300 |
| C | 9.71024400  | -0.92897000 | 0.01834600  | C | -4.24797700 | -0.99014000 | 1.19606700  |
| H | 10.15822200 | -0.89476700 | -0.97617800 | C | -2.94559800 | -0.21777300 | 0.96505900  |
| H | 9.94670500  | -0.00023100 | 0.55308200  | H | -0.96737300 | 0.93351400  | -0.88915200 |
| H | 10.12471300 | -1.78234300 | 0.57087300  | H | -1.44321300 | 1.18365300  | -3.31602600 |
| C | -4.36255200 | -6.25217700 | -0.71508000 | H | -3.58576200 | 0.36901000  | -4.25224200 |
| C | -4.09000400 | -5.78399900 | 0.55434400  | H | -5.27102300 | -0.74097500 | -2.80788600 |
| C | -3.19070600 | -4.70614000 | 0.76479000  | N | -4.84602900 | -1.12127400 | -0.04750500 |
| C | -2.55575200 | -4.11520800 | -0.37651000 | C | -6.16253700 | -1.71727800 | -0.23450100 |
| C | -2.87167600 | -4.59934000 | -1.66549100 | H | -6.12719200 | -2.38793300 | -1.09962300 |
| C | -3.75655500 | -5.64858900 | -1.83882100 | H | -6.33053600 | -2.33237800 | 0.65471800  |
| H | -3.40727800 | -4.66277800 | 2.92798700  | O | -4.70698000 | -1.36733900 | 2.25690100  |
| H | -5.04957400 | -7.08398900 | -0.85195200 | N | -2.37125400 | 0.29359500  | 2.01061200  |
| H | -4.56316300 | -6.24174100 | 1.42065400  | C | -1.14922800 | 0.87881900  | 2.03687300  |
| C | -2.90313700 | -4.22000100 | 2.07354600  | O | -0.15783500 | 0.50308400  | 1.38519500  |
| C | -1.56570700 | -3.05117900 | -0.20050000 | O | -0.94430100 | 1.87285500  | 2.90865600  |
| H | -2.39657300 | -4.11763400 | -2.51504900 | C | -1.95516000 | 2.42745600  | 3.84747000  |
| H | -3.98582100 | -6.01243300 | -2.83753800 | C | -7.26930500 | -0.68661100 | -0.39086400 |
| C | -1.35177100 | -2.60890200 | 1.12530000  | C | -7.45044800 | 0.30348500  | 0.58568200  |
| C | -2.00325700 | -3.19259900 | 2.23242100  | C | -8.12729700 | -0.71194900 | -1.49413600 |

|   |              |             |             |   |             |             |             |
|---|--------------|-------------|-------------|---|-------------|-------------|-------------|
| C | -8.46052400  | 1.25379600  | 0.45103000  |   |             |             |             |
| H | -6.80086300  | 0.32020400  | 1.45677700  | H | -3.68426800 | 2.34049700  | 2.52189600  |
| C | -9.14541100  | 0.23607400  | -1.62778000 | H | -3.75351700 | 3.61282900  | 3.75158300  |
| H | -8.00152400  | -1.47959700 | -2.25531800 | C | -1.13586100 | 3.48137000  | 4.59704400  |
| C | -9.31094400  | 1.22397800  | -0.65776900 | H | -0.75747100 | 4.24493900  | 3.91134200  |
| H | -8.58859900  | 2.01624500  | 1.21495300  | H | -1.76235400 | 3.97227400  | 5.34889900  |
| H | -9.80299300  | 0.20392500  | -2.49256400 | H | -0.28512500 | 3.01685200  | 5.10570100  |
| H | -10.09849000 | 1.96552400  | -0.76197000 | H | 2.35005000  | -5.49652900 | -2.98970100 |
| C | -2.44671300  | 1.34099500  | 4.80891900  | C | 2.44619300  | -6.64468900 | -1.21536800 |
| H | -1.59568600  | 0.85862700  | 5.30247400  | H | 2.50219200  | -6.62350000 | -0.12614200 |
| H | -3.06432600  | 1.80800200  | 5.58456100  | C | 2.37629100  | -7.82161900 | -1.83723800 |
| H | -3.03822100  | 0.58051200  | 4.29773800  | H | 2.30316000  | -7.89429900 | -2.92057300 |
| C | -3.09041500  | 3.08306400  | 3.05838200  | H | 2.38522200  | -8.75868500 | -1.28794300 |
| H | -2.69586400  | 3.81407300  | 2.34530000  | H | 0.64623300  | -2.52362800 | -1.19283700 |

### ***Re*-face complex for N1-benzylisatin ketimine of later case**

B3LYP/6-31G(d) level of theory:

Charge: 0

Spin Multiplicity: 1

Electronic Energy (au): -3983.89669929

Electronic Energy (au): -3983.51144281 at M06-2X/6-311+G(d,p)// B3LYP/6-31G(d) level of theory

|   |            |             |             |   |            |             |             |
|---|------------|-------------|-------------|---|------------|-------------|-------------|
|   |            |             |             | H | 4.96068900 | -3.20938500 | -1.40172000 |
| C | 3.39387700 | -1.68814800 | -1.26007700 | C | 3.04252800 | -0.35828400 | -3.37574800 |
| C | 4.81973700 | -2.14144800 | -3.30434000 |   |            |             |             |
| C | 4.77284700 | -2.19437400 | -1.76408300 | H | 2.37405100 | -0.33067700 | -4.24034200 |
| H | 2.85765800 | -2.46911100 | -0.71894100 | H | 2.96289400 | 0.59494600  | -2.84874000 |
| H | 5.57132800 | -1.56722000 | -1.35492000 | C | 4.50053500 | -0.70298800 | -3.76012000 |

|   |             |             |             |   |             |             |             |
|---|-------------|-------------|-------------|---|-------------|-------------|-------------|
| H | 4.63564800  | -0.60534300 | -4.84235800 | C | -0.52715900 | 5.22257700  | -1.18307700 |
| H | 5.18927300  | 0.00427300  | -3.28526900 | H | 0.96223300  | 3.85961200  | -1.92468900 |
| H | 5.81306500  | -2.43705600 | -3.65536200 | C | -1.48237200 | 5.49608700  | -0.20249600 |
| C | 3.75077700  | -3.08882100 | -3.91783100 | H | -2.08650900 | 6.39319800  | -0.25323400 |
|   |             |             |             | C | -0.30242700 | 6.21872300  | -2.29001400 |
| C | 2.39123900  | -2.73019700 | -3.25922900 | C | -2.71192900 | 4.79529600  | 1.88295000  |
| H | 1.59629800  | -2.57686000 | -3.99263800 | F | -1.44144900 | 6.87620400  | -2.61033600 |
| H | 2.04693400  | -3.48666500 | -2.55300800 | F | 0.60580200  | 7.15899000  | -1.94389100 |
| N | 2.51473800  | -1.44590100 | -2.47680000 | F | 0.15215200  | 5.62923000  | -3.41858800 |
| C | 3.50693300  | -0.43325900 | -0.34944200 | F | -3.74363900 | 3.93190200  | 1.71625100  |
| C | 4.16512700  | -0.85677900 | 0.96730800  | F | -2.23570100 | 4.59511500  | 3.12988700  |
| C | 7.41476800  | 1.05824800  | 1.16553100  | F | -3.22958500 | 6.04273600  | 1.83995200  |
| H | 5.79869400  | 1.11310200  | -0.19748400 | C | 3.53545900  | -1.78058400 | 1.77647000  |
| C | 7.22975200  | -0.41298500 | 3.07361600  | C | 6.18372000  | 0.63144800  | 0.69428600  |
| H | 3.63339600  | -2.93907200 | 3.60840500  | C | 5.96682200  | -0.87123800 | 2.62359100  |
| C | 7.94748600  | 0.52472800  | 2.36784700  | C | 4.14474400  | -2.21185400 | 2.97890600  |
| H | 7.60821500  | -0.82887300 | 4.00187500  | C | 5.43370700  | -0.34324700 | 1.39528800  |
| H | 8.90992300  | 0.85595200  | 2.74048000  | H | 2.56104800  | -2.18288800 | 1.51138000  |
| N | 5.32148700  | -1.79427700 | 3.39247800  | H | 4.12887300  | 0.30763400  | -0.85014900 |
| N | 2.22175900  | 0.21421100  | -0.14751500 | O | 8.04998000  | 1.99755700  | 0.40971100  |
| H | 1.53542200  | -0.24545400 | 0.46210200  | C | 9.27688800  | 2.53971300  | 0.87637700  |
| C | 1.98193100  | 1.54396500  | -0.40996500 | H | 9.56878200  | 3.28815400  | 0.13775300  |
| S | 3.11767500  | 2.55833700  | -1.16608600 | H | 9.15926900  | 3.02410000  | 1.85409400  |
| N | 0.74334000  | 1.91510900  | 0.00625200  | H | 10.06073300 | 1.77365200  | 0.94219600  |
| H | 0.21427000  | 1.15848600  | 0.49659500  | C | -0.83089400 | -2.02654900 | 6.02095000  |
| C | 0.07838100  | 3.15207500  | -0.08894300 | C | -2.02203700 | -1.45001400 | 5.62808800  |
| C | -0.86990800 | 3.43048600  | 0.90552200  | C | -2.16230700 | -0.84650600 | 4.35146200  |
| C | 0.24379300  | 4.06172200  | -1.14413600 | C | -1.04368900 | -0.87264100 | 3.46054000  |
| C | -1.64885500 | 4.58470200  | 0.83734000  | C | 0.16780600  | -1.45086400 | 3.89670100  |
| H | -1.00954600 | 2.73333500  | 1.72518800  | C | 0.28121200  | -2.01820800 | 5.15208000  |

|   |             |             |             |   |              |             |             |
|---|-------------|-------------|-------------|---|--------------|-------------|-------------|
| H | -4.20253700 | -0.16167900 | 4.65212700  | C | -0.52215300  | -2.23802300 | -0.95168900 |
| H | -0.74417900 | -2.47651000 | 7.00702100  | O | -0.11724100  | -1.35893900 | -1.72833400 |
| H | -2.87417600 | -1.44047300 | 6.30444200  | O | 0.34009000   | -3.25243300 | -0.69598700 |
| C | -3.36667100 | -0.19235100 | 3.95809300  | C | 0.01067400   | -4.50487500 | 0.04549300  |
| C | -1.14833500 | -0.27554300 | 2.13218100  | C | -7.41262400  | -1.73639900 | -0.32890500 |
| H | 1.01642100  | -1.41510000 | 3.22219500  | C | -7.28869200  | -3.08854800 | -0.67825000 |
| H | 1.22537800  | -2.44900400 | 5.47654000  |   |              |             |             |
| C | -2.36720200 | 0.37449200  | 1.81592700  | C | -8.54771400  | -1.03156300 | -0.74023200 |
| C | -3.44040600 | 0.42638800  | 2.73060700  | C | -8.27852500  | -3.71573700 | -1.43253200 |
| H | -2.43702000 | 0.89556300  | 0.86742500  | H | -6.41626100  | -3.64558200 | -0.34623900 |
| H | -4.33879200 | 0.97336100  | 2.45206400  | C | -9.54294900  | -1.65950100 | -1.49363000 |
| O | -0.16831200 | -0.33823200 | 1.28697200  | H | -8.65958600  | 0.01547300  | -0.46483000 |
| C | -4.54604300 | -0.22438100 | -1.10216400 | C | -9.40841400  | -3.00250600 | -1.84367200 |
| C | -3.17238000 | -0.47557500 | -1.38183700 | H | -8.17243800  | -4.76501600 | -1.69547400 |
| C | -2.51688000 | 0.29933500  | -2.34749900 | H | -10.41937200 | -1.09803400 | -1.80646200 |
| C | -3.22553300 | 1.29483900  | -3.02094900 | H | -10.18003400 | -3.49368900 | -2.43052000 |
| C | -4.57712800 | 1.51823900  | -2.73755900 | C | -0.32877800  | -4.21774000 | 1.50823700  |
| C | -5.25641400 | 0.76172800  | -1.77561800 | H | 0.44546800   | -3.60392300 | 1.97725500  |
| C | -4.00420700 | -1.94237200 | 0.30380500  | H | -1.28451600  | -3.70390400 | 1.60414200  |
| C | -2.76228700 | -1.57205500 | -0.51240500 | H | -0.38144600  | -5.16866200 | 2.05139000  |
| H | -1.46936300 | 0.11980500  | -2.54516000 | C | 1.32583300   | -5.28549500 | -0.05794900 |
| H | -2.72269500 | 1.90358600  | -3.76626800 | H | 1.58822300   | -5.48395000 | -1.10360600 |
| H | -5.11653100 | 2.29549600  | -3.27229100 | H | 2.14702700   | -4.73550800 | 0.41503300  |
| H | -6.30762900 | 0.93459400  | -1.57373500 | H | 1.22771400   | -6.24804900 | 0.45388000  |
| N | -5.01270800 | -1.07818500 | -0.10212100 | C | -1.11229300  | -5.25909100 | -0.67284100 |
| C | -6.33726800 | -1.06445100 | 0.50683600  | H | -0.88503500  | -5.37260900 | -1.73930900 |
| H | -6.21828200 | -1.58148700 | 1.46397500  | H | -1.20657300  | -6.26093200 | -0.23906500 |
| H | -6.61238400 | -0.02533400 | 0.72060200  | H | -2.06677400  | -4.74398300 | -0.55662800 |
| O | -4.12626200 | -2.84866400 | 1.10644400  | H | 3.69500200   | -2.86838800 | -4.99107000 |
| N | -1.73502900 | -2.34619700 | -0.33976400 | C | 4.06775700   | -4.55424000 | -3.76684600 |

|   |            |             |             |   |            |             |             |
|---|------------|-------------|-------------|---|------------|-------------|-------------|
| H | 4.12424100 | -4.93631800 | -2.74657800 | H | 4.50901100 | -6.43862500 | -4.62341800 |
| C | 4.27519500 | -5.39016400 | -4.78456400 | H | 1.54150700 | -1.23009500 | -2.13359    |
| H | 4.22046600 | -5.05861200 | -5.81963000 |   |            |             |             |

## Si-face complex for N1-benzylisatin ketimine of later case

B3LYP/6-31G(d) level of theory:

Charge: 0

Spin Multiplicity: 1

Electronic Energy (au): -3983.89014087

Electronic Energy (au): -3983.50403940 at M06-2X/6-311+G(d,p)// B3LYP/6-31G(d) level of theory

|   |             |             |             |   |             |             |             |
|---|-------------|-------------|-------------|---|-------------|-------------|-------------|
| C | -2.63256400 | -2.77051700 | 0.21852700  | H | -1.43174000 | -2.03940700 | -4.74315000 |
| C | -4.14654400 | -4.25019600 | 1.61902500  | C | -7.03170700 | -1.82422000 | -3.87923000 |
| C | -3.74277600 | -3.85987100 | 0.18115500  | H | -5.85737500 | -2.17687800 | -5.64369100 |
| H | -1.73349200 | -3.11008500 | -0.30317000 | H | -7.97911000 | -1.88816800 | -4.40196000 |
| H | -4.61827000 | -3.48196000 | -0.35363800 | N | -3.48171500 | -2.05431300 | -4.70539700 |
| H | -3.39601000 | -4.73569500 | -0.37588900 | N | -2.14477800 | -0.34110500 | -0.06740300 |
| C | -3.26970000 | -2.08622700 | 2.55602000  | H | -1.19371200 | -0.36870500 | -0.46397300 |
| H | -2.86362300 | -2.11106700 | 3.57053800  | C | -2.57839600 | 0.91473100  | 0.30282400  |
| H | -3.44873600 | -1.04392900 | 2.28074100  | S | -4.11041900 | 1.19622800  | 0.97370100  |
| C | -4.52728600 | -2.97138300 | 2.39395400  | N | -1.62266100 | 1.85135100  | 0.05960300  |
| H | -4.93472200 | -3.22630100 | 3.37783500  | H | -0.84857100 | 1.49458700  | -0.52695000 |
| H | -5.30816300 | -2.42175700 | 1.85703800  | C | -1.48556800 | 3.19293000  | 0.45682600  |
| H | -4.99365200 | -4.94202100 | 1.58999800  | C | -0.48082300 | 3.92514000  | -0.19880700 |
| C | -2.95261100 | -4.91647100 | 2.35867000  | C | -2.22739400 | 3.81480400  | 1.47088200  |
| C | -1.73249900 | -3.97868400 | 2.17065800  | C | -0.21725900 | 5.24274700  | 0.16066300  |
| H | -1.17643700 | -3.79982100 | 3.09196500  | H | 0.09766200  | 3.46078400  | -0.98954700 |
| H | -1.02595600 | -4.36485100 | 1.43163700  | C | -1.95621900 | 5.14193100  | 1.80702000  |
| N | -2.18691300 | -2.63209400 | 1.66400900  | H | -3.01441500 | 3.27589300  | 1.97736400  |
| C | -3.07103100 | -1.41397200 | -0.39516300 | C | -0.95533100 | 5.86899400  | 1.16487600  |
| C | -3.25490300 | -1.59484600 | -1.90676600 | H | -0.76323700 | 6.90155100  | 1.43002400  |
| C | -6.99036800 | -1.55934400 | -2.48594100 | C | -2.71822800 | 5.78463000  | 2.93628000  |
| H | -5.80174300 | -1.22084900 | -0.77276300 | C | 0.92017100  | 5.97625100  | -0.50184100 |
| C | -5.85585100 | -1.98701400 | -4.57508600 | F | -2.06654900 | 5.64881700  | 4.11699000  |



|   |              |             |             |   |             |             |             |
|---|--------------|-------------|-------------|---|-------------|-------------|-------------|
| F | -2.88469200  | 7.11201500  | 2.73618300  | C | 1.81071800  | 1.22349300  | 0.32646600  |
| F | -3.94303300  | 5.24262300  | 3.10127700  | C | 2.84885000  | 2.10609800  | 0.69935500  |
| F | 0.70094600   | 7.31180900  | -0.53170300 | H | 1.18751200  | 0.76198900  | 1.08255900  |
| F | 2.08541100   | 5.78725000  | 0.15928400  | H | 3.07209900  | 2.23438500  | 1.75494800  |
| F | 1.11538700   | 5.56763800  | -1.77207200 | O | 0.35120300  | 0.41436800  | -1.37297800 |
| C | -2.14830000  | -1.71644200 | -2.72282500 | H | -3.20656300 | -4.95884600 | 3.42521600  |
| C | -5.77558000  | -1.47911700 | -1.82521100 | C | -2.64360400 | -6.31955900 | 1.90564300  |
| C | -4.59525600  | -1.90387600 | -3.93261800 | H | -2.35573100 | -6.43977600 | 0.86009900  |
| C | -2.31324100  | -1.94237300 | -4.11069300 | C | -2.69595700 | -7.39549800 | 2.69125800  |
| C | -4.55217600  | -1.65634200 | -2.51649700 | H | -2.96935300 | -7.32571500 | 3.74226600  |
| H | -1.13918100  | -1.60814900 | -2.33253600 | H | -2.46914400 | -8.38870400 | 2.31446700  |
| H | -4.01823200  | -1.11794700 | 0.05448000  | H | -1.32390200 | -2.02576200 | 1.67958700  |
| O | -8.10074900  | -1.36913100 | -1.71755400 | C | 4.00423300  | -1.63822500 | -1.28898600 |
| C | -9.37392100  | -1.34315600 | -2.34643400 | C | 2.82246600  | -1.88227300 | -0.53656600 |
| H | -10.09200200 | -1.13393500 | -1.55168300 | C | 1.77777300  | -2.60967700 | -1.11516700 |
| H | -9.43393800  | -0.55226500 | -3.10483500 | C | 1.93003000  | -3.11347800 | -2.40899800 |
| H | -9.61909400  | -2.30870700 | -2.80820000 | C | 3.10822200  | -2.87987900 | -3.12338100 |
| C | 3.78000700   | 3.05836600  | -3.97903800 | C | 4.16151300  | -2.13577700 | -2.57424200 |
| C | 4.06269400   | 3.24645300  | -2.63965200 | C | 4.41461600  | -0.65128300 | 0.73197800  |
| C | 3.31345900   | 2.58691100  | -1.63287700 | C | 3.03664100  | -1.30496000 | 0.78104500  |
| C | 2.24708900   | 1.72184900  | -2.03654800 | H | 0.86686400  | -2.76722400 | -0.55392800 |
| C | 1.97428800   | 1.55340000  | -3.41042400 | H | 1.12570200  | -3.68281500 | -2.86583500 |
| C | 2.72949300   | 2.20239100  | -4.37112300 | H | 3.21455400  | -3.27769900 | -4.12903000 |
| H | 4.38534800   | 3.45710800  | 0.04903100  | H | 5.07349700  | -1.96867600 | -3.13638400 |
| H | 4.36546100   | 3.57711900  | -4.73451700 | N | 4.91065500  | -0.88082900 | -0.54110400 |
| H | 4.86678900   | 3.91423400  | -2.33776000 | C | 6.24389200  | -0.46208000 | -0.95658200 |
| C | 3.58913000   | 2.77848600  | -0.24410300 | H | 6.18393000  | -0.05636100 | -1.97181100 |
| C | 1.41753900   | 1.05727000  | -1.02933500 | H | 6.51078500  | 0.35975400  | -0.28555600 |
| H | 1.15208200   | 0.89965900  | -3.68369900 | O | 5.00006000  | -0.08256700 | 1.63574500  |
| H | 2.51108000   | 2.06150200  | -5.42668400 | N | 2.50788500  | -1.46151800 | 1.96635700  |

|   |            |             |             |   |            |             |             |
|---|------------|-------------|-------------|---|------------|-------------|-------------|
| C | 1.23246600 | -1.83693400 | 2.18905300  | H | 9.91045300 | -4.43441100 | -0.63341300 |
| O | 0.27741500 | -1.67921100 | 1.40447500  | C | 2.48815100 | -1.19120400 | 4.95320500  |
| O | 0.93023300 | -2.34155300 | 3.40376300  | H | 1.68793200 | -0.47957900 | 5.18497100  |
| C | 1.89522500 | -2.53337500 | 4.51379400  | H | 3.07899700 | -1.34282400 | 5.86382700  |
| C | 7.27621000 | -1.57507200 | -0.87550800 | H | 3.13120900 | -0.76582800 | 4.18198400  |
| C | 7.50612800 | -2.23028500 | 0.34323600  | C | 2.96773500 | -3.54782100 | 4.10806200  |
| C | 8.01513000 | -1.95773200 | -1.99866900 | H | 2.50450900 | -4.46483500 | 3.72636000  |
| C | 8.44623100 | -3.25522200 | 0.42837600  | H | 3.63136800 | -3.13786800 | 3.34511800  |
| H | 6.95026100 | -1.92457800 | 1.22551000  | H | 3.57059900 | -3.81222600 | 4.98405300  |
| C | 8.96287800 | -2.98140500 | -1.91374700 | C | 0.99760400 | -3.11000000 | 5.61292300  |
| H | 7.85262700 | -1.45033300 | -2.94766800 | H | 0.55168900 | -4.05955400 | 5.29613900  |
| C | 9.17672400 | -3.63555900 | -0.70104600 | H | 1.58417400 | -3.29373400 | 6.51866700  |
| H | 8.61488500 | -3.75442200 | 1.37908000  | H | 0.19304100 | -2.40984100 | 5.86053800  |
| H | 9.52863300 | -3.26807600 | -2.79638000 |   |            |             |             |

### Transition State - 1 (TS-1, *Re* face) for *NI*-benzylisatin ketimine

B3LYP/6-31G(d) level of theory:

Charge: 0

Spin Multiplicity: 1

Imaginary frequency: -281.92 cm<sup>-1</sup>

Electronic Energy (au): -3983.88353843

Electronic Energy (au): -3983.50557539 at M06-2X/6-311+G(d,p)// B3LYP/6-31G(d) level of theory

|   |            |             |             |   |            |             |             |
|---|------------|-------------|-------------|---|------------|-------------|-------------|
|   |            |             |             | C | 2.56465800 | -1.96261100 | -2.91926900 |
| C | 1.81939000 | -2.98840300 | -0.73983900 | H | 2.16118500 | -1.70668900 | -3.90224100 |
| C | 2.99645700 | -4.40563200 | -2.47418400 | H | 2.95524800 | -1.05708200 | -2.45441500 |
| C | 2.66954000 | -4.26679200 | -0.97276900 | C | 3.62247600 | -3.08926200 | -2.98028200 |
| H | 0.86909700 | -3.22212700 | -0.25884800 | H | 3.97804100 | -3.20729300 | -4.00899800 |
| H | 3.59739400 | -4.20307000 | -0.39594400 | H | 4.48990700 | -2.81548200 | -2.37031900 |
| H | 2.13793500 | -5.15109100 | -0.60873100 | H | 3.68900900 | -5.23823300 | -2.62860900 |

|   |             |             |             |   |             |             |             |
|---|-------------|-------------|-------------|---|-------------|-------------|-------------|
| C | 1.69483200  | -4.65247300 | -3.28651700 | C | 3.30004900  | 5.75430100  | -0.42363800 |
| C | 0.68172900  | -3.55800100 | -2.86227800 | H | 3.54026400  | 6.80634000  | -0.51640800 |
| H | 0.19133000  | -3.08473100 | -3.71502900 | C | 5.70691900  | 5.29132300  | 0.09275100  |
| H | -0.10134100 | -3.93305100 | -2.20341400 | C | 0.91361400  | 6.25390100  | -1.05174600 |
| N | 1.39605000  | -2.46116800 | -2.10387800 | F | 6.39180400  | 4.50937500  | 0.95465200  |
|   |             |             |             | F | 6.38659100  | 5.27816700  | -1.07738100 |
| C | 2.57820200  | -1.92305300 | 0.09732200  | F | 5.76290500  | 6.55884400  | 0.56225700  |
| C | 2.57362500  | -2.36747000 | 1.56592400  | F | 1.19888900  | 7.53274900  | -0.72952700 |
| C | 6.19185100  | -2.96356500 | 2.47960800  | F | 0.73244500  | 6.21706500  | -2.39714300 |
| H | 5.25757200  | -2.22057700 | 0.73489200  | F | -0.28139300 | 5.94825600  | -0.49687500 |
| C | 4.78697100  | -3.48496800 | 4.37437900  | C | 1.37626600  | -2.47365200 | 2.24300800  |
| H | 0.39737800  | -2.97295600 | 4.11285600  | C | 5.08094500  | -2.61120300 | 1.73045500  |
| C | 6.04293300  | -3.41101300 | 3.81795300  | C | 3.62856200  | -3.13236600 | 3.63860500  |
| H | 4.64418600  | -3.81454500 | 5.39850900  | C | 1.35115600  | -2.89870500 | 3.59231700  |
| H | 6.90917900  | -3.68655200 | 4.40834500  | C | 3.77733100  | -2.69130500 | 2.27635800  |
| N | 2.42611600  | -3.22980300 | 4.27435300  | H | 0.43384900  | -2.23483000 | 1.75766700  |
| N | 2.06443400  | -0.57175900 | -0.08959200 | H | 3.60440300  | -1.87609300 | -0.26326100 |
| H | 1.10980600  | -0.35961700 | 0.21883300  | O | 7.39533900  | -2.84864500 | 1.85062700  |
| C | 2.90003600  | 0.51963900  | -0.24790500 | C | 8.58258000  | -3.10269200 | 2.58762600  |
| S | 4.51019400  | 0.36944400  | -0.76002200 | H | 9.40560600  | -2.90665700 | 1.89834300  |
| N | 2.25427500  | 1.68850100  | -0.00776500 | H | 8.67082200  | -2.43536900 | 3.45437600  |
| H | 1.23420500  | 1.58486000  | 0.15602300  | H | 8.63643500  | -4.14608000 | 2.92532500  |
| C | 2.68161400  | 3.02062700  | -0.16665100 | C | -4.66384200 | -5.24765600 | -1.88585700 |
| C | 1.68369300  | 3.95146700  | -0.48770500 | C | -4.68070400 | -4.86685900 | -0.55235300 |
| C | 3.99226900  | 3.46779100  | 0.04957100  | C | -3.85938700 | -3.81966300 | -0.08571500 |
| C | 1.99575700  | 5.30199600  | -0.61890700 | C | -2.98839100 | -3.17791000 | -1.00825500 |
| H | 0.67007800  | 3.60266000  | -0.65049300 | C | -2.99316500 | -3.57107900 | -2.35737500 |
| C | 4.28513000  | 4.82561400  | -0.08612300 | C | -3.82421400 | -4.58971400 | -2.79997400 |
| H | 4.76810000  | 2.76842200  | 0.32504700  | H | -4.52126400 | -3.93255900 | 1.99080500  |
|   |             |             |             | H | -5.31126400 | -6.05167300 | -2.22658600 |

|   |             |             |             |   |              |             |             |
|---|-------------|-------------|-------------|---|--------------|-------------|-------------|
| H | -5.34135400 | -5.37022100 | 0.14986700  | O | -0.66708000  | 1.84235800  | -1.57689000 |
| C | -3.88076100 | -3.39505300 | 1.29580700  | C | -1.40641700  | 2.23164000  | -2.79286600 |
| C | -2.05908400 | -2.13794500 | -0.53320200 | C | -7.73674800  | 0.76749000  | 1.12772400  |
| H | -2.35431700 | -3.03161000 | -3.04891500 | C | -7.67652400  | 1.64919000  | 0.03982200  |
| H | -3.83538000 | -4.87137300 | -3.84941600 | C | -8.73127100  | 0.95024900  | 2.09325700  |
| C | -2.29118400 | -1.58847900 | 0.79864000  | C | -8.58996600  | 2.69598900  | -0.07110500 |
| C | -3.12698300 | -2.34626000 | 1.71326100  | H | -6.91454900  | 1.50485600  | -0.72169900 |
| H | -1.42849200 | -1.07681500 | 1.21636400  | C | -9.65078200  | 1.99623500  | 1.98165900  |
| H | -3.16423700 | -2.02613600 | 2.75134900  | H | -8.79046700  | 0.26765100  | 2.93905300  |
| O | -1.10511200 | -1.73776000 | -1.25132600 | C | -9.57978900  | 2.87328300  | 0.89991000  |
| C | -4.61954300 | 0.59673400  | 2.21851100  | H | -8.53238200  | 3.37347000  | -0.91903800 |
| C | -3.27408600 | 0.76726700  | 1.82896100  | H | -10.41678100 | 2.12621100  | 2.74178900  |
| C | -2.37286800 | 1.35545800  | 2.71072000  | H | -10.29081200 | 3.69043700  | 0.81159400  |
| C | -2.82176700 | 1.76396300  | 3.97430700  | C | -1.96973200  | 1.00094300  | -3.51393600 |
| C | -4.15457100 | 1.58253800  | 4.34580700  | H | -2.75275900  | 0.51886700  | -2.92908600 |
| C | -5.07704900 | 0.99645100  | 3.46894100  | H | -2.37680800  | 1.30920800  | -4.48431000 |
| C | -4.56476700 | -0.19822900 | 0.06099900  | H | -1.17082300  | 0.27263600  | -3.69705100 |
| C | -3.13517000 | 0.23187000  | 0.43397600  | C | -0.31586100  | 2.88753800  | -3.64878900 |
| H | -1.33987500 | 1.48608200  | 2.41122400  | H | 0.08500500   | 3.78654100  | -3.17194300 |
| H | -2.12475300 | 2.22638100  | 4.66733400  | H | 0.51042800   | 2.18922600  | -3.82042600 |
| H | -4.49107800 | 1.90625300  | 5.32725700  | H | -0.73032100  | 3.17689700  | -4.62055100 |
| H | -6.11856000 | 0.88433400  | 3.75106400  | C | -2.49297300  | 3.25300400  | -2.44086700 |
| N | -5.35569600 | 0.00492600  | 1.17994900  | H | -2.05722300  | 4.10331500  | -1.90405300 |
| C | -6.75608000 | -0.38785000 | 1.23209000  | H | -2.95365200  | 3.63251300  | -3.36042400 |
| H | -6.89078600 | -1.07597300 | 0.39133400  | H | -3.26873700  | 2.79840900  | -1.82253200 |
| H | -6.93001800 | -0.94926700 | 2.15789300  | H | 1.94083400   | -4.51919400 | -4.34735800 |
| O | -4.95978700 | -0.62628400 | -1.00826100 | C | 1.11303500   | -6.03250400 | -3.12098900 |
| N | -2.47708700 | 0.81597200  | -0.59535800 | H | 0.75659400   | -6.29396400 | -2.12390900 |
| C | -1.20409600 | 1.16741000  | -0.52031400 | C | 1.01072700   | -6.92827500 | -4.10294000 |
| O | -0.37914900 | 0.92928100  | 0.41058000  | H | 1.34066300   | -6.70913200 | -5.11657200 |

H 0.59212400 -7.91584400 -3.93217800 H 0.68930700 -1.72881100 -1.91716000

### Transition State-2 (TS-2, Si face) for N1-benzylisatin ketimine

B3LYP/6-31G(d) level of theory:

Charge: 0

Spin Multiplicity: 1

Imaginary frequency: -282.30 cm-1

Electronic Energy (au): -3983.88001671

Electronic Energy (au): -3983.49851599 at M06-2X/6-311+G(d,p)// B3LYP/6-31G(d) level of theory

|   |            |             |             |   |            |             |             |
|---|------------|-------------|-------------|---|------------|-------------|-------------|
|   |            |             |             | C | 3.75971100 | -1.16064200 | 1.43563800  |
| C | 2.57999200 | -2.71730700 | -0.13675100 | C | 7.49458700 | -1.00451400 | 0.87253100  |
| C | 3.72912500 | -4.35638400 | -1.69444800 | H | 5.84584300 | -1.02324400 | -0.44764500 |
| C | 3.71805100 | -3.76938400 | -0.26718100 | C | 7.03717700 | -0.99424600 | 3.24403800  |
| H | 1.91837100 | -2.95272100 | 0.70209600  | H | 2.86257400 | -1.03955300 | 4.71654200  |
| H | 4.68103900 | -3.29938300 | -0.05180100 | C | 7.95099800 | -0.97883500 | 2.21581400  |
| H | 3.58980700 | -4.56376000 | 0.47424500  | H | 7.35700800 | -0.96264800 | 4.28064800  |
| C | 2.39693700 | -2.43426500 | -2.62662300 | H | 9.01085600 | -0.93655100 | 2.43839500  |
| H | 1.71345200 | -2.67053300 | -3.44562300 | N | 4.81122000 | -1.03853500 | 4.07747600  |
| H | 2.53408700 | -1.35198300 | -2.59144500 | N | 2.10016700 | -0.27158700 | -0.18978600 |
| C | 3.73557200 | -3.20398500 | -2.72001300 | H | 1.33839800 | -0.23257400 | 0.49194400  |
| H | 3.86735200 | -3.59650200 | -3.73351600 | C | 2.40092600 | 0.94551500  | -0.78220200 |
| H | 4.57454900 | -2.52652800 | -2.52849300 | S | 3.65263800 | 1.11652800  | -1.90518400 |
| H | 4.61238300 | -4.98775500 | -1.82859700 | N | 1.56024500 | 1.92371400  | -0.35080100 |
| C | 2.44246600 | -5.19313000 | -1.93225000 | H | 0.93556400 | 1.63147300  | 0.42043100  |
| C | 1.25174200 | -4.30808200 | -1.48875200 | C | 1.39521300 | 3.26939800  | -0.72420200 |
| H | 0.41340700 | -4.31945800 | -2.18440100 | C | 0.67244900 | 4.06111900  | 0.18295200  |
| H | 0.86336900 | -4.59830400 | -0.50956700 | C | 1.84954400 | 3.84084700  | -1.92164200 |
| N | 1.69169000 | -2.86309900 | -1.36347000 | C | 0.41679600 | 5.40041000  | -0.10152200 |
| C | 3.12770700 | -1.27753500 | 0.04121100  | H | 0.31313100 | 3.62250700  | 1.11046500  |

|   |             |             |             |   |             |             |             |
|---|-------------|-------------|-------------|---|-------------|-------------|-------------|
| C | 1.58415300  | 5.18456500  | -2.18427400 | H | -3.27397200 | -4.52937000 | 2.94449800  |
| H | 2.40058800  | 3.24503700  | -2.63414700 | H | -4.92967500 | -7.06337800 | -0.77085900 |
| C | 0.87050000  | 5.97796800  | -1.28612100 | H | -4.42157000 | -6.17547400 | 1.47911600  |
| H | 0.66915400  | 7.01890800  | -1.50561500 | C | -2.88128000 | -4.01692600 | 2.07053000  |
| C | 2.12568900  | 5.80771400  | -3.44528900 | C | -1.71085400 | -2.81445400 | -0.24993700 |
| C | -0.39404500 | 6.20466600  | 0.87979600  | H | -2.50191000 | -3.97342700 | -2.53886400 |
| F | 1.31484900  | 6.78785200  | -3.90490500 | H | -3.99052300 | -5.96439200 | -2.79872400 |
| F | 3.34007600  | 6.36841700  | -3.24229100 | C | -1.69047400 | -2.12613600 | 1.04090800  |
| F | 2.26931600  | 4.90252100  | -4.43679400 | C | -2.17101600 | -2.87109000 | 2.19955800  |
| F | -0.34387400 | 7.52740200  | 0.62118100  | H | -0.78992400 | -1.53289800 | 1.18115400  |
| F | -1.70001900 | 5.84390200  | 0.86220800  | H | -2.00638600 | -2.43648100 | 3.18094700  |
| F | 0.03995700  | 6.02472600  | 2.15010600  | O | -0.97161500 | -2.46183800 | -1.20592700 |
| C | 2.94804200  | -1.12981400 | 2.55147100  | C | -4.02531800 | -0.46417900 | -1.05856800 |
| C | 6.13839400  | -1.05870000 | 0.59532900  | C | -2.78006300 | -0.08139600 | -0.51804200 |
| C | 5.64246200  | -1.04443500 | 2.99685700  | C | -1.85050800 | 0.55352400  | -1.33256500 |
| C | 3.51647500  | -1.06405000 | 3.84605600  | C | -2.17133900 | 0.81192600  | -2.67163300 |
| C | 5.17861600  | -1.09058700 | 1.63584600  | C | -3.40753000 | 0.42506800  | -3.18893900 |
| H | 1.86456200  | -1.12617800 | 2.46247600  | C | -4.35633800 | -0.22216500 | -2.38663800 |
| H | 3.88586100  | -1.09310900 | -0.71829800 | C | -4.18631700 | -1.02016800 | 1.16520900  |
| O | 8.32311600  | -0.97786200 | -0.20929700 | C | -2.76240000 | -0.47434000 | 0.92930600  |
| C | 9.72068600  | -0.83097200 | -0.00018800 | H | -0.88575400 | 0.83213800  | -0.93113300 |
| H | 10.16589700 | -0.79368900 | -0.99583100 | H | -1.45011800 | 1.31639200  | -3.30833700 |
| H | 9.95356600  | 0.09849500  | 0.53464700  | H | -3.64819400 | 0.63369800  | -4.22818600 |
| H | 10.14075900 | -1.68272500 | 0.55058800  | H | -5.32835600 | -0.49441800 | -2.78381100 |
| C | -4.28813300 | -6.19195000 | -0.66658300 | N | -4.81784900 | -1.06474700 | -0.06810300 |
| C | -4.00391600 | -5.69477800 | 0.59771900  | C | -6.15450400 | -1.61348100 | -0.24705100 |
| C | -3.18367300 | -4.55963800 | 0.76343600  | H | -6.14304900 | -2.28689800 | -1.11212900 |
| C | -2.63878100 | -3.94810300 | -0.39977700 | H | -6.33679200 | -2.21871000 | 0.64656700  |
| C | -2.92746000 | -4.47066900 | -1.67244500 | O | -4.69295900 | -1.34555200 | 2.22281200  |
| C | -3.75456700 | -5.57622400 | -1.81161200 | N | -2.35889700 | 0.35830100  | 1.94217900  |

|   |              |             |             |   |             |             |             |
|---|--------------|-------------|-------------|---|-------------|-------------|-------------|
| C | -1.15125100  | 0.88313300  | 1.99764600  | C | -3.05095700 | 3.13313300  | 2.99812600  |
| O | -0.11775700  | 0.53082900  | 1.34624200  | H | -2.64929900 | 3.87341400  | 2.29833200  |
| O | -0.91479200  | 1.89354400  | 2.87619500  | H | -3.62668100 | 2.39119300  | 2.44305600  |
| C | -1.92000900  | 2.46705700  | 3.78903800  | H | -3.72256500 | 3.65396800  | 3.69093300  |
| C | -7.24834800  | -0.57112600 | -0.40552300 | C | -1.10441900 | 3.52161200  | 4.54568800  |
| C | -7.42500800  | 0.42201200  | 0.56779700  | H | -0.71518400 | 4.28123600  | 3.86120800  |
| C | -8.11368200  | -0.60497000 | -1.50325400 | H | -1.73479500 | 4.01992800  | 5.29002600  |
| C | -8.44252000  | 1.36537500  | 0.43610400  | H | -0.25948000 | 3.05565800  | 5.06356700  |
| H | -6.76515300  | 0.44547200  | 1.43107700  | H | 2.36288600  | -5.38383900 | -3.00984000 |
| C | -9.13734300  | 0.33674900  | -1.63460700 | C | 2.42900800  | -6.52551300 | -1.22927400 |
| H | -7.98880500  | -1.37575700 | -2.26163900 | H | 2.46812200  | -6.50017400 | -0.13938800 |
| C | -9.30168000  | 1.32618200  | -0.66582100 | C | 2.36983000  | -7.70432500 | -1.84892900 |
| H | -8.56845700  | 2.13120900  | 1.19697500  | H | 2.31743400  | -7.78080100 | -2.93316700 |
| H | -9.80043700  | 0.29831700  | -2.49504100 | H | 2.36984400  | -8.63946900 | -1.29644600 |
| H | -10.09428100 | 2.06294300  | -0.76636600 | H | 0.80182200  | -2.32352600 | -1.23386700 |
| C | -2.43985300  | 1.39937100  | 4.75898700  |   |             |             |             |
| H | -1.60073600  | 0.91475700  | 5.27187100  |   |             |             |             |
| H | -3.06944800  | 1.87615100  | 5.51953800  |   |             |             |             |
| H | -3.02464700  | 0.64115100  | 4.23655500  |   |             |             |             |

### Transition State (*Re* face) for N1-phenylisatin ketimine

B3LYP/6-31G(d) level of theory:

Charge: 0

Spin Multiplicity: 1

Imaginary frequency: -277.90 cm<sup>-1</sup>

Electronic Energy (au): -3944.56759875

Electronic Energy (au): -3944.19942896 at M06-2X/6-311+G(d,p)// B3LYP/6-31G(d) level of theory

|   |             |             |             |   |             |             |             |
|---|-------------|-------------|-------------|---|-------------|-------------|-------------|
| C | 0.85627200  | -3.12357200 | -0.83026700 | C | 2.84885100  | -0.06450500 | -0.22727300 |
| C | 1.60724100  | -4.76388200 | -2.60530200 | S | 4.36356500  | -0.63067100 | -0.74051600 |
| C | 1.31587100  | -4.58152800 | -1.10127100 | N | 2.54066600  | 1.22987600  | 0.03836100  |
| H | -0.12701300 | -3.09204000 | -0.36042100 | H | 1.52957300  | 1.40178000  | 0.19996700  |
| H | 2.21829900  | -4.79776900 | -0.52115100 | C | 3.31225200  | 2.40076700  | -0.08818700 |
| H | 0.55382300  | -5.29112200 | -0.76555900 | C | 2.60317100  | 3.57283000  | -0.38793700 |
| C | 1.88756400  | -2.28668900 | -2.97414600 | C | 4.69284800  | 2.47494500  | 0.14104900  |
| H | 1.58493400  | -1.89863400 | -3.95002700 | C | 3.26670300  | 4.79273800  | -0.48454200 |
| H | 2.51116000  | -1.54155600 | -2.47912200 | H | 1.53445600  | 3.51297700  | -0.56089600 |
| C | 2.58489600  | -3.66352400 | -3.06785300 | C | 5.34032000  | 3.70754600  | 0.03911300  |
| H | 2.90515100  | -3.84652400 | -4.09863400 | H | 5.25013500  | 1.58700500  | 0.40213600  |
| H | 3.48680600  | -3.66552600 | -2.44642400 | C | 4.64317900  | 4.87384700  | -0.27642700 |
| H | 2.03932600  | -5.75311400 | -2.78262700 | H | 5.15764700  | 5.82459200  | -0.34190600 |
| C | 0.29864700  | -4.61150200 | -3.42916200 | C | 6.83322600  | 3.76757800  | 0.23409600  |
| C | -0.37013100 | -3.28836000 | -2.97434100 | C | 2.48380200  | 6.01176100  | -0.89139400 |
| H | -0.69663700 | -2.67182300 | -3.81413600 | F | 7.23211200  | 4.98014000  | 0.68146300  |
| H | -1.23516600 | -3.44554900 | -2.33005000 | F | 7.26421400  | 2.84626400  | 1.12258800  |
| N | 0.61546700  | -2.45939400 | -2.17997000 | F | 7.49736700  | 3.53945600  | -0.92262100 |
| C | 1.87450600  | -2.33844000 | 0.03946800  | F | 3.09583800  | 7.15690900  | -0.52438100 |
| C | 1.74638500  | -2.82231300 | 1.48984800  | F | 2.31783400  | 6.06726900  | -2.23795700 |
| C | 5.07253300  | -4.39808200 | 2.34651900  | F | 1.24303400  | 6.01969500  | -0.35266300 |
| H | 4.37740000  | -3.35190600 | 0.64640700  | C | 0.56204700  | -2.63372000 | 2.17215300  |
| C | 3.57136200  | -4.61581900 | 4.22666900  | C | 4.09842800  | -3.72896400 | 1.62352500  |
| H | -0.52052700 | -2.93721700 | 4.02695800  | C | 2.55180900  | -3.93322300 | 3.51780700  |
| C | 4.80413800  | -4.85255200 | 3.66356100  | C | 0.42008100  | -3.09705800 | 3.50165600  |
| H | 3.34202600  | -4.94288200 | 5.23576700  | C | 2.81792300  | -3.48580300 | 2.17581900  |
| H | 5.56373300  | -5.37600500 | 4.23270100  | H | -0.28149100 | -2.13179600 | 1.70564600  |
| N | 1.36451300  | -3.73484600 | 4.15864300  | H | 2.87519300  | -2.56048100 | -0.32744900 |
| N | 1.74935700  | -0.89293400 | -0.09463200 | O | 6.26631300  | -4.57686800 | 1.71378900  |
| H | 0.88322100  | -0.43995600 | 0.21535800  | C | 7.33995000  | -5.17156200 | 2.42836700  |



|   |             |             |             |   |             |             |             |
|---|-------------|-------------|-------------|---|-------------|-------------|-------------|
| H | 8.18895500  | -5.16795500 | 1.74272200  | H | -1.50515400 | 2.92796100  | 4.68573400  |
| H | 7.59763600  | -4.59391600 | 3.32526800  | H | -3.86685700 | 3.27328800  | 5.35795700  |
| H | 7.11333200  | -6.20681800 | 2.71561100  | H | -5.71999900 | 2.70245300  | 3.80795400  |
| C | -5.97918000 | -3.45712000 | -2.07093600 | N | -5.25395200 | 1.64920400  | 1.22450200  |
| C | -5.91573500 | -3.13596000 | -0.72337100 | O | -5.01094400 | 0.99700600  | -0.99567700 |
| C | -4.84247100 | -2.38111600 | -0.20693800 | N | -2.24816800 | 1.69171800  | -0.55011800 |
| C | -3.80705400 | -1.97763100 | -1.09398200 | C | -0.92744600 | 1.67813700  | -0.47469600 |
| C | -3.89480500 | -2.30382100 | -2.45821100 | O | -0.20007200 | 1.20322500  | 0.44641400  |
| C | -4.96945800 | -3.03010300 | -2.94947100 | O | -0.22534900 | 2.20452800  | -1.51887800 |
| H | -5.55432500 | -2.37617500 | 1.85536400  | C | -0.82823400 | 2.81171700  | -2.72064100 |
| H | -6.82025300 | -4.03171900 | -2.45050400 | C | -1.71080600 | 1.80290100  | -3.46586000 |
| H | -6.70697500 | -3.45445000 | -0.04882100 | H | -2.59821600 | 1.54541400  | -2.88817300 |
| C | -4.77241200 | -2.01861800 | 1.19025800  | H | -2.01402200 | 2.23373400  | -4.42749200 |
| C | -2.63444700 | -1.25750000 | -0.56890300 | H | -1.14623400 | 0.88490700  | -3.66764900 |
| H | -3.11691500 | -1.94069500 | -3.12182400 | C | 0.40091000  | 3.16141500  | -3.56829700 |
| H | -5.03810000 | -3.25858000 | -4.00963000 | H | 1.03637300  | 3.89942200  | -3.07045800 |
| C | -2.73214900 | -0.71294200 | 0.78118700  | H | 1.00019600  | 2.26595700  | -3.76552200 |
| C | -3.76417900 | -1.23890200 | 1.65691500  | H | 0.08257600  | 3.58212000  | -4.52823100 |
| H | -1.77163800 | -0.46891400 | 1.22643700  | C | -1.59055700 | 4.08476200  | -2.33802200 |
| H | -3.73090800 | -0.95933600 | 2.70688900  | H | -0.93641400 | 4.77050000  | -1.78766600 |
| O | -1.59196000 | -1.11233400 | -1.26112600 | H | -1.93201500 | 4.59666300  | -3.24527100 |
| C | -4.37160300 | 1.99958500  | 2.27124700  | H | -2.45976000 | 3.84725400  | -1.72253300 |
| C | -3.03369400 | 1.80719600  | 1.87093300  | H | 0.58479600  | -4.52220400 | -4.48454500 |
| C | -1.99860400 | 2.14119200  | 2.74086700  | C | -0.65019500 | -5.77575100 | -3.30907400 |
| C | -2.30723900 | 2.66573800  | 4.00181300  | H | -1.07138800 | -5.96102300 | -2.32023500 |
| C | -3.63688300 | 2.85727400  | 4.38055600  | C | -0.99753900 | -6.56968200 | -4.32204700 |
| C | -4.68973900 | 2.52960800  | 3.51778500  | H | -0.61405200 | -6.41665900 | -5.32895500 |
| C | -4.53338300 | 1.27212800  | 0.08505200  | H | -1.68000200 | -7.40339600 | -4.18472600 |
| C | -3.04393000 | 1.28650600  | 0.46708900  | H | 0.14191300  | -1.56382400 | -1.97264800 |
| H | -0.97198100 | 1.99255400  | 2.42884800  | C | -6.67434800 | 1.62971500  | 1.30076900  |

|   |             |            |             |   |              |            |             |
|---|-------------|------------|-------------|---|--------------|------------|-------------|
| C | -7.43848400 | 2.21314800 | 0.28307200  | H | -6.71624800  | 0.52884300 | 3.15233100  |
| C | -7.31204400 | 1.00675900 | 2.38141200  | C | -9.46899100  | 1.57348400 | 1.44188900  |
| C | -8.83023700 | 2.17624200 | 0.35654200  | H | -9.41718400  | 2.62860300 | -0.43821200 |
| H | -6.94057000 | 2.67712600 | -0.55944000 | H | -9.19074900  | 0.50888900 | 3.29816400  |
| C | -8.70454800 | 0.98996700 | 2.45357100  | H | -10.55394800 | 1.55536900 | 1.49709000  |

### Transition State (*Si* face) for N1-phenylisatin ketimine

B3LYP/6-31G(d) level of theory:

Charge: 0

Spin Multiplicity: 1

Imaginary frequency: -283.32 cm<sup>-1</sup>

Electronic Energy (au): -3944.56369980

Electronic Energy (au): -3944.19250544 at M06-2X/6-311+G(d,p)// B3LYP/6-31G(d) level of theory

|   |             |             |             |   |             |             |             |
|---|-------------|-------------|-------------|---|-------------|-------------|-------------|
|   |             |             |             | H | -1.12825400 | -3.94408900 | -2.32061900 |
| C | 1.39929500  | -3.23851000 | -0.18197400 | H | -0.85988300 | -4.36940400 | -0.63744800 |
| C | 1.94416100  | -5.15006100 | -1.74863600 | N | 0.55311200  | -3.04588500 | -1.43394900 |
| C | 2.08851200  | -4.62636700 | -0.30549700 | C | 2.41523500  | -2.08698500 | 0.03384600  |
| H | 0.67239900  | -3.22978500 | 0.63549000  | C | 3.00364300  | -2.20489400 | 1.44688400  |
| H | 3.14471400  | -4.54023300 | -0.03846600 | C | 6.55833400  | -3.40747300 | 0.99054900  |
| H | 1.63935400  | -5.33908800 | 0.39291000  | H | 5.05304700  | -2.83445500 | -0.37588300 |
| C | 1.40106600  | -2.87357800 | -2.66931400 |   |             |             |             |
| H | 0.70349100  | -2.84416500 | -3.50977500 | C | 6.06604400  | -3.22683800 | 3.34828900  |
| H | 1.90810600  | -1.90924200 | -2.60559700 | H | 2.11299500  | -1.76413400 | 4.70194600  |
| C | 2.38578500  | -4.06253300 | -2.74886000 | C | 6.95358000  | -3.54477200 | 2.34638500  |
| H | 2.39932400  | -4.46467500 | -3.76724000 | H | 6.34531600  | -3.31019200 | 4.39370200  |
| H | 3.40368400  | -3.72582900 | -2.52597200 | H | 7.95029600  | -3.88717300 | 2.59963200  |
| H | 2.55496300  | -6.04948300 | -1.87765000 | N | 3.94992400  | -2.46439700 | 4.11815900  |
| C | 0.45074600  | -5.47776600 | -2.02072600 | N | 1.81753400  | -0.78143000 | -0.21343200 |
| C | -0.36599000 | -4.23894000 | -1.60064500 | H | 1.09188400  | -0.47941000 | 0.44129000  |

|   |            |             |             |   |             |             |             |
|---|------------|-------------|-------------|---|-------------|-------------|-------------|
| C | 2.54880000 | 0.25288100  | -0.77723600 | H | 9.17885200  | -4.18324900 | -0.79912500 |
| S | 3.82448400 | -0.02957800 | -1.85052300 | H | 9.25902300  | -3.27253000 | 0.73302000  |
| N | 2.08659600 | 1.46462900  | -0.36650200 | H | 8.78613600  | -5.00000100 | 0.73756300  |
| H | 1.36248000 | 1.40951300  | 0.37024000  | C | -6.15656600 | -4.20999900 | -0.88046700 |
| C | 2.42154700 | 2.78343300  | -0.72240300 | C | -5.77814600 | -3.82647100 | 0.39827500  |
| C | 1.93902300 | 3.78055500  | 0.14189300  | C | -4.64047400 | -3.01959800 | 0.60750100  |
| C | 3.15405900 | 3.15886200  | -1.85777900 | C | -3.88009600 | -2.62242000 | -0.52720200 |
| C | 2.19169600 | 5.12401200  | -0.12408500 | C | -4.27096200 | -3.02850100 | -1.81561900 |
| H | 1.37399100 | 3.49731900  | 1.02656000  | C | -5.40510500 | -3.80714700 | -1.99798300 |
| C | 3.39438000 | 4.51077800  | -2.10413500 | H | -4.80270600 | -2.95671600 | 2.78332100  |
| H | 3.54297300 | 2.40471000  | -2.52606100 | H | -7.04251100 | -4.82466100 | -1.01815900 |
| C | 2.92263700 | 5.50522300  | -1.24829100 | H | -6.36658600 | -4.13897600 | 1.25744700  |
| H | 3.12732200 | 6.54949800  | -1.44636500 | C | -4.22887900 | -2.60374000 | 1.93089400  |
| C | 4.12663800 | 4.90087700  | -3.36248500 | C | -2.64321300 | -1.84794600 | -0.33188100 |
| C | 1.64503000 | 6.15928600  | 0.82294700  | H | -3.67261300 | -2.69889400 | -2.65970600 |
| F | 5.05774700 | 3.98818400  | -3.71015400 | H | -5.71280400 | -4.10370200 | -2.99709800 |
| F | 3.27881700 | 5.01673000  | -4.41241300 | C | -2.44073300 | -1.21333600 | 0.97084800  |
| F | 4.75254100 | 6.09181500  | -3.23139300 | C | -3.18422500 | -1.75823700 | 2.10077700  |
| F | 0.29184300 | 6.21061100  | 0.77727300  | H | -1.39809400 | -0.95927400 | 1.14559500  |
| F | 1.97803300 | 5.88456200  | 2.10709900  | H | -2.92246600 | -1.40397800 | 3.09315200  |
| F | 2.10043000 | 7.39805500  | 0.54676100  | O | -1.80128600 | -1.74445600 | -1.26202000 |
| C | 2.22449600 | -1.88271900 | 2.53943700  | C | -4.08021700 | 1.16731400  | -1.11726000 |
| C | 5.28280800 | -2.96921400 | 0.67476700  | C | -2.77716000 | 1.08638500  | -0.58757000 |
| C | 4.75487100 | -2.77160800 | 3.06150200  | C | -1.68805900 | 1.37941000  | -1.40128800 |
| C | 2.73984700 | -2.02345700 | 3.85004800  | C | -1.90503600 | 1.76422300  | -2.72953800 |
| C | 4.34584200 | -2.65066600 | 1.68752400  | C | -3.20267900 | 1.84813500  | -3.23490600 |
| H | 1.21795400 | -1.49028000 | 2.41932600  | C | -4.31188300 | 1.55119500  | -2.43353400 |
| H | 3.21412400 | -2.17984300 | -0.69969000 | C | -4.40106200 | 0.69973700  | 1.11944500  |
| O | 7.37219100 | -3.68454200 | -0.06723200 | C | -2.88085600 | 0.711129500 | 0.85766300  |
| C | 8.72073100 | -4.05475200 | 0.18298900  | H | -0.68587100 | 1.30141000  | -1.00201900 |

|   |             |            |             |   |              |             |             |
|---|-------------|------------|-------------|---|--------------|-------------|-------------|
| H | -1.05724500 | 1.99888300 | -3.36679100 | H | 0.34659400   | -5.61489500 | -3.10784200 |
| H | -3.36366200 | 2.15548000 | -4.26499200 | C | 0.01159200   | -6.77377900 | -1.37915100 |
| H | -5.32021600 | 1.63966400 | -2.82250000 | H | 0.64077300   | -7.62347400 | -1.64887500 |
| N | -5.03442700 | 0.88237400 | -0.11449100 | C | -1.03057200  | -6.99026500 | -0.57545300 |
| O | -4.95905900 | 0.57049500 | 2.18841700  | H | -1.72890800  | -6.21521000 | -0.27123200 |
| N | -2.20449500 | 1.35437300 | 1.86303400  | H | -1.23853900  | -7.98631100 | -0.19555700 |
| C | -0.88934600 | 1.43019500 | 1.90844100  | H | -0.09206100  | -2.23020500 | -1.30653200 |
| O | -0.04671200 | 0.74699700 | 1.24576000  | C | -6.44656500  | 0.85646800  | -0.29255000 |
| O | -0.31330300 | 2.29358100 | 2.78683200  | C | -7.00717400  | 0.08085700  | -1.31503300 |
| C | -1.05387900 | 3.16308000 | 3.72004000  | C | -7.27638800  | 1.59150400  | 0.56233700  |
| C | -1.89420600 | 2.32231200 | 4.68812800  | C | -8.38995600  | 0.06366100  | -1.49544900 |
| H | -1.26310500 | 1.57656200 | 5.18572400  | H | -6.36176700  | -0.51816000 | -1.94942200 |
| H | -2.31794700 | 2.97487400 | 5.46050300  | C | -8.65864600  | 1.55324500  | 0.38391600  |
| H | -2.70581000 | 1.81272900 | 4.16731600  | H | -6.83696600  | 2.17430000  | 1.36276900  |
| C | -1.89933300 | 4.18276200 | 2.94984300  | C | -9.22046200  | 0.79850300  | -0.64768100 |
| H | -1.27646100 | 4.74872000 | 2.24941200  | H | -8.81766300  | -0.53756300 | -2.29340100 |
| H | -2.69847200 | 3.68644900 | 2.39744000  | H | -9.29799600  | 2.12366200  | 1.05226400  |
| H | -2.34662300 | 4.89363700 | 3.65461300  | H | -10.29798100 | 0.77916100  | -0.78647400 |
| C | 0.08057000  | 3.86759400 | 4.47240900  |   |              |             |             |
| H | 0.69785900  | 4.45611300 | 3.78731300  |   |              |             |             |
| H | -0.33320700 | 4.54301600 | 5.22898800  |   |              |             |             |
| H | 0.72135100  | 3.13570800 | 4.97528900  |   |              |             |             |

**Transition State (Re face) for N1-methylisatin ketimine**

B3LYP/6-31G(d) level of theory:

Charge: 0

Spin Multiplicity: 1

Imaginary frequency: -277.40 cm<sup>-1</sup>

Electronic Energy (au): -3752.83267660

Electronic Energy (au): -3752.49179172 at M06-2X/6-311+G(d,p)// B3LYP/6-31G(d) level of theory

|   |             |            |             |   |             |             |             |
|---|-------------|------------|-------------|---|-------------|-------------|-------------|
| C | 0.71356300  | 2.94544700 | -0.83594000 | H | -3.33538200 | 6.82772300  | 3.77219100  |
| C | 0.64159100  | 4.62880900 | -2.72453000 | N | 0.06985700  | 3.88880900  | 4.08379000  |
| C | 0.74586600  | 4.45593100 | -1.19461700 | N | -0.89766100 | 1.14351200  | -0.13605900 |
| H | 1.59846000  | 2.64759400 | -0.27263400 | H | -0.25427200 | 0.45526500  | 0.26759900  |
| H | -0.08846800 | 4.96833000 | -0.70588500 | C | -2.19491700 | 0.70626000  | -0.33835800 |
| H | 1.66078200  | 4.92025500 | -0.81468100 | S | -3.40112400 | 1.70011000  | -0.99775900 |
| C | -0.34175200 | 2.33111700 | -3.04285300 | N | -2.34493300 | -0.60101900 | -0.00822900 |
| H | -0.08840100 | 1.81768100 | -3.97387500 | H | -1.45926100 | -1.08222100 | 0.24100700  |
| H | -1.19914700 | 1.83313600 | -2.59022800 | C | -3.44753700 | -1.46316800 | -0.16238200 |
| C | -0.58328500 | 3.84557500 | -3.24122400 | C | -3.14517200 | -2.81440600 | -0.38123300 |
| H | -0.75165700 | 4.05717600 | -4.30205800 | C | -4.78723300 | -1.07230500 | -0.03213300 |
| H | -1.48880700 | 4.14949000 | -2.70528400 | C | -4.16529700 | -3.75496500 | -0.49485800 |
| H | 0.54508800  | 5.68976000 | -2.97307400 | H | -2.10770500 | -3.11345600 | -0.47918300 |
| C | 1.90317000  | 4.04282200 | -3.41790200 | C | -5.79574900 | -2.02993600 | -0.14944900 |
| C | 2.10345400  | 2.61182800 | -2.85508100 | H | -5.03655900 | -0.04007400 | 0.16584800  |
| H | 2.30010700  | 1.87491500 | -3.63606600 | C | -5.50179700 | -3.37347800 | -0.38452900 |
| H | 2.91770900  | 2.54750700 | -2.13342100 | H | -6.29467000 | -4.10709900 | -0.46376400 |
| N | 0.85153800  | 2.16228400 | -2.13445100 | C | -7.23596900 | -1.59580600 | -0.06232500 |
| C | -0.56275300 | 2.55871800 | -0.04025500 | C | -3.80241400 | -5.17947400 | -0.81681600 |
| C | -0.39200600 | 3.03804700 | 1.40742400  | F | -7.39194500 | -0.51073200 | 0.72613800  |
| C | -3.05823200 | 5.66050200 | 1.95100600  | F | -7.73463700 | -1.27470800 | -1.27869000 |
| H | -2.62610800 | 4.36998300 | 0.33365200  | F | -8.02401900 | -2.57610300 | 0.43587700  |
| C | -1.71674000 | 5.45080800 | 3.94899400  | F | -4.77517900 | -6.04604200 | -0.46525400 |
| H | 1.58878400  | 2.51093600 | 4.12543000  | F | -3.58758300 | -5.34629200 | -2.14717000 |
| C | -2.75358200 | 6.05776600 | 3.27868400  | F | -2.66520000 | -5.56546500 | -0.19441900 |
| H | -1.46787000 | 5.72736200 | 4.96852600  | C | 0.60903600  | 2.50102800  | 2.19050000  |

|   |             |             |             |   |             |             |             |
|---|-------------|-------------|-------------|---|-------------|-------------|-------------|
| C | -2.31220100 | 4.67497700  | 1.32527400  | C | 2.60917700  | -2.90149100 | 2.22642200  |
| C | -0.93265600 | 4.43922100  | 3.34097100  | C | 1.48861300  | -2.84175300 | 3.04825500  |
| C | 0.79635500  | 2.94840500  | 3.51973900  | C | 1.55835600  | -3.38434900 | 4.33960900  |
| C | -1.23093800 | 4.04649300  | 1.98855000  | C | 2.73718700  | -3.97213200 | 4.79989000  |
| H | 1.27160500  | 1.73071400  | 1.80474600  | C | 3.87496300  | -4.04392500 | 3.98463400  |
| H | -1.41135800 | 3.06901200  | -0.49249700 | C | 4.31524100  | -2.91893600 | 0.54490100  |
| O | -4.07229200 | 6.19696100  | 1.21527200  | C | 2.87638700  | -2.44446000 | 0.82257600  |
| C | -4.93531300 | 7.14654400  | 1.82396500  | H | 0.58086100  | -2.37700100 | 2.68251000  |
| H | -5.68263600 | 7.39340400  | 1.06798400  | H | 0.68625600  | -3.34318800 | 4.98587300  |
| H | -5.43803400 | 6.72915400  | 2.70571200  | H | 2.77887900  | -4.38550800 | 5.80423000  |
| H | -4.39764600 | 8.06002200  | 2.11042000  | H | 4.78792600  | -4.51055400 | 4.34169000  |
| C | 7.40370100  | 1.07894100  | -1.37067900 | N | 4.78212500  | -3.49420400 | 1.71656800  |
| C | 7.11323500  | 0.81903600  | -0.03982600 | C | 6.11218000  | -4.04440800 | 1.85345200  |
| C | 5.81286900  | 0.44805900  | 0.36095400  | H | 6.62100900  | -3.89843900 | 0.89906400  |
| C | 4.79335300  | 0.37306700  | -0.62762700 | H | 6.66974500  | -3.53154700 | 2.64644500  |
| C | 5.11035400  | 0.62916600  | -1.97259700 | O | 4.94000100  | -2.83149400 | -0.49479000 |
| C | 6.40049400  | 0.97268700  | -2.34843100 | N | 2.05806600  | -2.59537400 | -0.24401000 |
| H | 6.28536700  | 0.25917400  | 2.48293400  | C | 0.80761100  | -2.16326500 | -0.25213800 |
| H | 8.41462100  | 1.35545500  | -1.65936500 | O | 0.22034300  | -1.44905600 | 0.61275000  |
| H | 7.89529600  | 0.88980200  | 0.71274600  | O | 0.03391000  | -2.47596500 | -1.33096500 |
| C | 5.49875800  | 0.15222500  | 1.73999700  | C | 0.48012100  | -3.28300500 | -2.48299700 |
| C | 3.40810000  | 0.07011500  | -0.22775400 | C | 1.67116000  | -2.62294400 | -3.18806300 |
| H | 4.32523900  | 0.51623000  | -2.71285300 | H | 2.55692700  | -2.61807200 | -2.55322000 |
| H | 6.63870400  | 1.14826500  | -3.39402000 | H | 1.88891500  | -3.16958100 | -4.11329300 |
| C | 3.19759000  | -0.44388300 | 1.12056800  | H | 1.42507300  | -1.58831000 | -3.45569800 |
| C | 4.25516900  | -0.25810000 | 2.09737500  | C | -0.74994200 | -3.26435400 | -3.39879500 |
| H | 2.17193700  | -0.35898000 | 1.46877500  | H | -1.60681800 | -3.75988000 | -2.93314600 |
| H | 4.03558400  | -0.49312400 | 3.13569000  | H | -1.03514000 | -2.23471900 | -3.64025100 |
| O | 2.44593500  | 0.24432700  | -1.02253400 | H | -0.52400600 | -3.78798000 | -4.33388400 |
| C | 3.78979000  | -3.50914600 | 2.70426700  | C | 0.78540200  | -4.71562600 | -2.03294000 |

|   |             |             |             |   |            |             |             |
|---|-------------|-------------|-------------|---|------------|-------------|-------------|
| H | -0.07494400 | -5.13842600 | -1.50157500 | C | 3.79759000 | 5.46540500  | -4.25506500 |
| H | 0.98356300  | -5.34280600 | -2.90993100 | H | 3.46580700 | 5.37215100  | -5.28732000 |
| H | 1.65873200  | -4.74061400 | -1.37935100 | H | 4.68785900 | 6.06366800  | -4.08417800 |
| H | 1.68681600  | 3.97754000  | -4.49151600 | H | 1.01520100 | 1.17898700  | -1.85592200 |
| C | 3.14773000  | 4.87562600  | -3.25157500 | H | 6.07223200 | -5.11586300 | 2.08448200  |
| H | 3.52663900  | 4.98698400  | -2.23492300 |   |            |             |             |

### Transition State (*Si* face) for N1-methylisatin ketimine

B3LYP/6-31G(d) level of theory:

Charge: 0

Spin Multiplicity: 1

Imaginary frequency: -281.33 cm<sup>-1</sup>

Electronic Energy (au): -3752.82839035

Electronic Energy (au): -3752.48472009 at M06-2X/6-311+G(d,p)// B3LYP/6-31G(d) level of theory

|   |             |            |             |   |             |            |             |
|---|-------------|------------|-------------|---|-------------|------------|-------------|
| C | 1.28539300  | 3.03019100 | -0.22363300 | C | 3.29283400  | 4.27066600 | -2.16014600 |
| C | 1.93039400  | 4.91421100 | -1.78516000 | C | 3.21229300  | 2.78388300 | -1.75929400 |
| C | 1.59097000  | 4.55077100 | -0.32504600 | H | 3.59868200  | 2.09821000 | -2.51224500 |
| H | 1.89482500  | 2.55486100 | 0.55030900  | H | 3.73526100  | 2.57204000 | -0.82651700 |
| H | 0.72666900  | 5.12525900 | 0.01751900  | N | 1.76724700  | 2.39104500 | -1.52034000 |
| H | 2.42949500  | 4.81662200 | 0.32600700  | C | -0.21283800 | 2.74950500 | 0.06599800  |
| C | 0.92258800  | 2.80024600 | -2.70064100 | C | -0.52156700 | 3.16500800 | 1.51124700  |
| H | 1.41148500  | 2.37718300 | -3.58153700 | C | -2.60991900 | 6.30666000 | 1.26287000  |
| H | -0.06177000 | 2.34116500 | -2.59574800 | H | -1.85024100 | 4.97292700 | -0.18805900 |
| C | 0.85721100  | 4.34456300 | -2.73434100 | C | -2.20267900 | 5.79248800 | 3.58726900  |
| H | 1.02595800  | 4.69968100 | -3.75632500 | H | 0.09613200  | 2.17988900 | 4.71013900  |
| H | -0.14041900 | 4.68617500 | -2.43902300 | C | -2.76284300 | 6.61677300 | 2.63898700  |
| H | 1.98746100  | 6.00246200 | -1.89116100 | H | -2.31333700 | 5.99859800 | 4.64703700  |

|   |             |             |             |   |             |             |             |
|---|-------------|-------------|-------------|---|-------------|-------------|-------------|
| H | -3.32415500 | 7.49024700  | 2.94992500  | H | 0.50920400  | 1.48349300  | 2.38034000  |
| N | -0.95846800 | 3.87280700  | 4.23309600  | H | -0.81798500 | 3.34140200  | -0.61841700 |
| N | -0.57892300 | 1.36485500  | -0.20474300 | O | -3.13868300 | 7.05597900  | 0.25446200  |
| H | -0.18225500 | 0.65691100  | 0.41812300  | C | -3.96270000 | 8.16550100  | 0.58316100  |
| C | -1.82302000 | 1.03766600  | -0.72524300 | H | -4.29852300 | 8.57672000  | -0.37028800 |
| S | -2.67855300 | 2.09128500  | -1.73470900 | H | -4.83649400 | 7.85933300  | 1.17218500  |
| N | -2.21291100 | -0.20432000 | -0.33120600 | H | -3.40615000 | 8.93656300  | 1.13188800  |
| H | -1.58558800 | -0.63878300 | 0.36803000  | C | 7.83534400  | -0.80013600 | -0.91324500 |
| C | -3.31263700 | -1.01258600 | -0.67053800 | C | 7.27092600  | -0.89087600 | 0.35138000  |
| C | -3.50602000 | -2.13833500 | 0.14814400  | C | 5.87295600  | -0.83205500 | 0.52853200  |
| C | -4.18375600 | -0.79422600 | -1.74762500 | C | 5.05561600  | -0.65859300 | -0.62321200 |
| C | -4.55305700 | -3.02082100 | -0.10550000 | C | 5.64408300  | -0.55891300 | -1.89630200 |
| H | -2.83893000 | -2.31307500 | 0.98876500  | C | 7.02107900  | -0.63949500 | -2.04753400 |
| C | -5.22522100 | -1.69215600 | -1.98248100 | H | 5.91187800  | -1.02312500 | 2.70257400  |
| H | -4.05793300 | 0.07307600  | -2.37878600 | H | 8.91511900  | -0.85593400 | -1.02656500 |
| C | -5.42553000 | -2.80855400 | -1.17195200 | H | 7.90663900  | -1.01779200 | 1.22437500  |
| H | -6.24528100 | -3.48981800 | -1.36003000 | C | 5.26235700  | -0.93318600 | 1.83618500  |
| C | -6.11182800 | -1.47481900 | -3.18186200 | C | 3.59937000  | -0.51233100 | -0.45819400 |
| C | -4.71983800 | -4.21510500 | 0.79644700  | H | 4.99028800  | -0.43935500 | -2.75495600 |
| F | -6.30879100 | -0.16368200 | -3.43390300 | H | 7.46900700  | -0.58121900 | -3.03582200 |
| F | -5.57121700 | -2.01262600 | -4.30133200 | C | 3.02142100  | -0.91693700 | 0.82256600  |
| F | -7.32643700 | -2.04537900 | -3.02000300 | C | 3.91529600  | -0.96741100 | 1.97300600  |
| F | -3.66613100 | -5.06149200 | 0.70254200  | H | 2.03527300  | -0.48908800 | 0.98639700  |
| F | -4.80520700 | -3.84770500 | 2.09780100  | H | 3.46765200  | -1.11022200 | 2.95194600  |
| F | -5.82895500 | -4.92532100 | 0.50709200  | O | 2.89202000  | -0.05637300 | -1.39458400 |
| C | -0.04150200 | 2.40380000  | 2.55741500  | C | 2.82185700  | -3.69179700 | -1.38842000 |
| C | -1.89108000 | 5.18837800  | 0.87339300  | C | 1.84296500  | -2.87030300 | -0.79071500 |
| C | -1.46407300 | 4.63850300  | 3.22477800  | C | 0.78819800  | -2.40048200 | -1.56363600 |
| C | -0.28817100 | 2.79235200  | 3.89583700  | C | 0.71225200  | -2.75818000 | -2.91671700 |
| C | -1.29269900 | 4.33232800  | 1.82950600  | C | 1.69282900  | -3.56681300 | -3.49118400 |



|   |             |             |             |   |            |             |             |
|---|-------------|-------------|-------------|---|------------|-------------|-------------|
| C | 2.76837900  | -4.04587400 | -2.73153000 | H | 5.60118200 | 3.48122100  | -0.61667400 |
| C | 3.43360800  | -3.62418600 | 0.82501800  | H | 6.29118700 | 5.18451100  | -0.53317900 |
| C | 2.20208100  | -2.70765900 | 0.65606900  | H | 1.79289100 | 1.34929500  | -1.41315700 |
| H | 0.03987600  | -1.75891000 | -1.11828300 | C | 4.89049700 | -4.96885200 | -0.68608900 |
| H | -0.11640500 | -2.39901900 | -3.52037100 | H | 4.55037800 | -5.93455900 | -1.08007900 |
| H | 1.62476700  | -3.83627100 | -4.54203400 | H | 5.59168700 | -4.52018200 | -1.39960300 |
| H | 3.52531500  | -4.68412100 | -3.17695000 | H | 5.39429000 | -5.12641700 | 0.26909000  |
| N | 3.77183700  | -4.08631900 | -0.43906600 |   |            |             |             |
| O | 4.01057500  | -3.91081200 | 1.85555300  |   |            |             |             |
| N | 1.30999400  | -2.85106800 | 1.68818200  |   |            |             |             |
| C | 0.22023900  | -2.11615000 | 1.78983800  |   |            |             |             |
| O | -0.05358800 | -1.04143400 | 1.16817700  |   |            |             |             |
| O | -0.73580000 | -2.47962000 | 2.68505000  |   |            |             |             |
| C | -0.65145200 | -3.64930500 | 3.57896600  |   |            |             |             |
| C | 0.55474300  | -3.52594400 | 4.51728200  |   |            |             |             |
| H | 0.52437700  | -2.56660800 | 5.04725200  |   |            |             |             |
| H | 0.51396300  | -4.32599600 | 5.26568100  |   |            |             |             |
| H | 1.49339400  | -3.60107400 | 3.96670200  |   |            |             |             |
| C | -0.62593100 | -4.94814900 | 2.76651300  |   |            |             |             |
| H | -1.48261500 | -4.99167300 | 2.08602700  |   |            |             |             |
| H | 0.29606000  | -5.02853200 | 2.18891900  |   |            |             |             |
| H | -0.69055300 | -5.80557400 | 3.44669100  |   |            |             |             |
| C | -1.95788600 | -3.54124200 | 4.37342400  |   |            |             |             |
| H | -2.82595300 | -3.61075200 | 3.71112100  |   |            |             |             |
| H | -2.01891500 | -4.35242700 | 5.10702200  |   |            |             |             |
| H | -2.00498000 | -2.58667200 | 4.90804100  |   |            |             |             |
| H | 3.38562900  | 4.33468100  | -3.25508300 |   |            |             |             |
| C | 4.47271800  | 5.01756300  | -1.58243400 |   |            |             |             |
| H | 4.46625500  | 6.08356400  | -1.81519000 |   |            |             |             |
| C | 5.49342400  | 4.53132300  | -0.87469000 |   |            |             |             |

## References

1. M. Montesinos-Magraner, C. Vila, R. Canton, G. Blay, I. Fernandez, M. C. Munoz, J. R. Pedro, *Angew. Chem. Int. Ed.*, 2015, **54**, 632
